# Supplementary material for: A prion accelerates proliferation at the expense of lifespan
Source: eLife. 2021 Sep 21;10:e60917. doi: 10.7554/eLife.60917 (PMC8455135; doi:10.7554/eLife.60917)
Supplement: Supplementary file 2. — See .xlsx file for transcripts per kilobase million for each gene in four replicates of naïve and four replicates of [BIG+]. Genes that showed significant differences are listed in a separate tab. [file elife-60917-supp2.xlsx]

## Sheet: differentially expressed genes
Upregulated in BIG+		GO term enrichments in upregulated genes (stringDB)
Systematic name		term ID	term description	observed gene count	background gene count	strength	false discovery rate	matching proteins in your network (IDs)	matching proteins in your network (labels)
YNL336W		GO:0006833	water transport	2	4	2.25	0.0336	4932.YLL052C,4932.YLL053C	AQY2,YLL053C
YHR157W		GO:0015250	water channel activity	2	4	2.25	0.0052	4932.YLL052C,4932.YLL053C	AQY2,YLL053C
YGL033W
YNL018C
YHR079C-A
YIL014C-A
YLR307C-A
YGR259C
YNL202W
YEL039C
YDR259C
YLL053C
YML131W
YIR034C
YIL011W
YLL052C
YML058W-A
YGR142W
YHR125W
Downregulated in BIG+		GO term enrichments in downregulated genes (stringDB)
Systematic name		term ID	term description	observed gene count	background gene count	strength	false discovery rate	matching proteins in your network (IDs)	matching proteins in your network (labels)
YPL036W		GO:0071944	cell periphery	14	790	0.63	5.64e-05	4932.YAR029W,4932.YCL048W-A,4932.YCR010C,4932.YDL222C,4932.YDR534C,4932.YGR256W,4932.YHR139C,4932.YIL120W,4932.YIR019C,4932.YKL220C,4932.YKR102W,4932.YKR106W,4932.YOR348C,4932.YPL036W	YAR029W,YCL048W-A,ADY2,FMP45,FIT1,GND2,SPS100,QDR1,FLO11,FRE2,FLO10,GEX2,PUT4,PMA2
YMR169C		GO:0005886	plasma membrane	11	528	0.7	0.00016	4932.YAR029W,4932.YCL048W-A,4932.YCR010C,4932.YDL222C,4932.YGR256W,4932.YIL120W,4932.YIR019C,4932.YKL220C,4932.YKR106W,4932.YOR348C,4932.YPL036W	YAR029W,YCL048W-A,ADY2,FMP45,GND2,QDR1,FLO11,FRE2,GEX2,PUT4,PMA2
YCR010C		GO:0031225	anchored component of membrane	4	68	1.15	0.0044	4932.YCL048W-A,4932.YDR534C,4932.YIR019C,4932.YKR102W	YCL048W-A,FIT1,FLO11,FLO10
YDR534C		GO:0031224	intrinsic component of membrane	14	1436	0.37	0.0131	4932.YAR029W,4932.YCL048W-A,4932.YCR010C,4932.YDL222C,4932.YDR534C,4932.YGR236C,4932.YIL120W,4932.YIR019C,4932.YKL220C,4932.YKR102W,4932.YKR106W,4932.YLR312C,4932.YOR348C,4932.YPL036W	YAR029W,YCL048W-A,ADY2,FMP45,FIT1,SPG1,QDR1,FLO11,FRE2,FLO10,GEX2,ATG39,PUT4,PMA2
YGR088W		GO:0005618	cell wall	4	118	0.91	0.0194	4932.YDR534C,4932.YHR139C,4932.YIR019C,4932.YKR102W	FIT1,SPS100,FLO11,FLO10
YDL222C		GO:0016020	membrane	16	2099	0.26	0.0393	4932.YAR029W,4932.YCL048W-A,4932.YCR010C,4932.YDL222C,4932.YDR534C,4932.YGR236C,4932.YGR256W,4932.YIL120W,4932.YIR019C,4932.YKL220C,4932.YKR102W,4932.YKR106W,4932.YLR312C,4932.YMR018W,4932.YOR348C,4932.YPL036W	YAR029W,YCL048W-A,ADY2,FMP45,FIT1,SPG1,GND2,QDR1,FLO11,FRE2,FLO10,GEX2,ATG39,PEX9,PUT4,PMA2
YGL205W		GO:0005777	peroxisome	3	83	0.94	0.0421	4932.YGL205W,4932.YGR088W,4932.YMR018W	POX1,CTT1,PEX9
YGR236C
YLR312C
YOR348C
YDR070C
YMR251W
YOL052C-A
YKR106W
YMR175W
YHR139C
YGR256W
YCL048W-A
YIL120W
YMR018W
YKL220C
YAR029W
YGR043C
YPL223C
YJL216C
YIR019C
YKR102W
YGL121C

## Sheet: results summary table
ORF	YDJ128_1	YDJ128_2	YDJ128_3	YDJ128_4	YDJ1952_1	YDJ1952_2	YDJ1952_3	YDJ1952_4
YBR024W	21.1061	18.8127	19.593	20.4985	20.5788	19.6223	20.4692	23.6935
YDL245C	4.6564	5.27091	4.6793	4.62261	4.54587	3.44261	3.28254	3.0747
YBR232C	18.9439	17.4282	16.4302	16.5692	18.2884	15.5879	13.9342	18.1828
YDR320W-B	2.87605	4.69467	4.30327	1.7271	4.5297	8.00829	3.59384	2.6767
YBR021W	9.33844	9.48759	9.14441	10.1392	12.3086	11.7012	11.438	12.1672
YGR014W	18.9059	17.4121	17.7766	16.7086	13.5174	15.243	15.5097	14.6701
YKL119C	30.7948	33.8942	31.4883	31.9395	36.6658	29.849	31.9356	30.6036
YPR031W	7.95626	8.0474	8.37995	7.97061	7.66001	7.86516	7.71147	7.85898
YKL066W	69.0013	82.5677	86.1765	72.3006	76.6974	69.3498	79.4486	61.7937
YJL076W	24.5693	23.0348	23.3163	24.0694	23.8478	22.6318	21.8465	22.5094
YPL174C	4.85733	5.27854	5.66329	4.98444	4.78301	4.52585	4.16237	4.61567
YIL003W	19.256	20.6543	21.2859	20.8374	23.257	24.8408	23.7034	26.6098
YML066C	3.85228	4.3045	4.16901	4.14867	3.63592	2.67694	3.10426	2.071
YMR129W	9.19451	9.13316	8.99682	9.20518	8.76342	8.80025	8.91128	8.88793
YBR140C	6.01809	5.9359	5.77968	5.63571	5.33056	4.84554	5.02981	5.34191
YGR242W	14.0651	13.705	11.4951	11.1884	14.1821	11.0147	15.6637	13.0866
YKR047W	39.1913	42.3312	43.7483	33.439	42.2491	45.137	38.4815	42.5914
YKL029C	98.2167	95.0381	91.8855	84.3698	105.145	88.3265	87.7799	83.5601
YLR154C-G	2717.53	2436.93	3131.61	7335.41	3300.34	2664.01	3033.89	3912.73
YPL028W	141.538	142.307	136.268	139.825	157.157	125.14	131.501	130.899
YDL235C	141.588	144.663	147.731	158.316	168.569	146.977	142.097	155.847
YER091C	27.159	26.4061	24.8696	24.8916	22.5232	21.4695	21.6339	19.5009
YMR121C	54.1362	51.4373	49.5683	47.1672	46.2834	50.8342	46.169	42.2763
YDR356W	8.32808	8.15059	8.15437	7.61652	7.0961	7.65617	6.90414	6.41533
YDR337W	45.2164	48.0574	48.9344	48.3502	49.2825	49.6641	47.7189	49.1632
YKL008C	22.4996	20.6799	21.0991	20.917	22.7711	22.6237	24.0973	21.8478
YER055C	268.366	273.069	261.347	263.653	322.612	231.906	241.075	241.543
YFR004W	83.6427	85.7804	86.6528	87.2145	104.769	92.9839	91.103	94.6124
YDR108W	7.804	7.25987	7.43473	7.1722	7.84455	6.60827	6.51874	6.0788
YDL200C	20.3547	22.0599	21.4016	24.4639	22.2985	25.3712	23.1104	24.6316
YJR134C	15.1781	15.201	16.2322	16.2625	17.6229	15.973	15.0385	15.078
YMR135C	18.9596	19.2714	17.774	19.3243	17.2394	17.5643	16.0947	15.1603
YGR012W	19.7877	21.1603	18.5836	20.3317	26.3469	21.3421	21.7647	21.4872
YNL244C	1166.6	1220.58	1191.7	1242.29	1323.67	1276.41	1288.76	1311.59
YCR024C-A	5011.56	4732.36	4814.86	4888.53	4167.5	4475.9	4194.74	4287.2
YOR027W	107.155	129.921	119.431	140.925	245.926	107.52	129.861	165.597
YBL101C	6.24197	5.77176	6.18468	5.82369	5.25503	5.18943	5.07092	4.95857
YLL040C	8.65731	9.02544	8.95562	8.7067	8.11478	7.56571	7.85851	8.19019
YDR181C	10.8655	11.3467	12.294	12.1053	12.136	11.3789	10.9659	10.9924
YML116W-A	44.4435	44.7882	46.1277	40.3455	44.0281	39.3442	34.885	39.7268
YPR096C	7.04834	6.54969	4.63514	4.10875	4.17123	6.12092	6.21714	5.29034
YJL210W	30.2902	28.967	30.2611	28.701	27.0047	29.983	26.9654	26.9524
YLR216C	128.822	155.243	141.282	157.291	226.251	137.404	153.742	182.23
YGL118C	0	0	0	0	0	0	0	0
YMR021C	13.4738	14.2871	13.9124	13.461	14.4391	14.6416	14.2728	14.0117
YNL079C	620.488	654.939	696.262	702.073	774.43	679.02	692.975	719.431
YBL058W	80.0811	84.2509	79.4574	83.363	100.342	79.0365	83.96	91.5123
YJR127C	16.7957	14.8455	16.1537	14.5252	10.9565	13.3769	12.3598	11.8425
YLR088W	13.1042	11.8576	11.6661	11.8504	13.4506	12.0548	13.6772	13.2588
YKL128C	59.3637	63.7572	61.4122	61.2905	79.8822	59.3791	63.4573	62.867
YLR100W	74.8291	78.0176	76.175	77.5087	79.1384	65.5748	66.8228	65.735
YKL106C-A	8.09689	3.59137	2.38144	1.11586	6.92427	0	1.07261	4.6865
YBR080C	31.0137	31.2907	31.7172	32.2165	34.7361	29.839	29.3099	31.2224
YOR292C	8.26456	9.14139	9.00638	8.18939	8.08658	8.07866	7.52367	7.55123
YNL219C	22.0215	22.3711	21.3367	20.6284	25.4377	20.9621	22.1527	23.2093
YPR179C	8.62264	8.95713	9.34599	9.02922	9.28311	9.83279	8.78662	8.08634
YOL062C	21.1538	23.5715	21.7613	22.8568	24.8715	22.1593	21.461	22.8063
YDR540C	8.50761	10.4807	11.4331	10.3573	14.1389	12.0511	11.5248	11.1894
YER087W	5.66307	5.63429	5.80448	5.84768	6.69501	5.71622	5.9303	5.71543
YOL140W	12.3993	11.5707	12.3893	11.8127	11.2627	11.3269	11.2137	11.605
YFL009W	14.4109	14.5379	13.7591	13.7283	15.1981	13.1383	12.5656	12.4819
YLL004W	6.58204	6.69587	6.8722	7.02789	6.79814	6.56695	6.13273	6.5821
YKL057C	13.3652	13.0846	12.7683	12.6073	12.6941	12.0403	12.336	12.0847
YPL130W	0	0	0	0	0	0	0	0
YDL046W	221.656	238.061	223.818	246.797	274.981	219.805	242.943	239.753
YPL072W	6.45979	6.81058	6.973	6.45006	6.71165	9.08189	8.2528	8.17974
YPR150W	1.24641	2.07252	1.21848	1.37108	1.5722	0	1.58177	1.32305
YER180C	19.2368	19.1188	18.4278	18.1283	17.7379	18.5386	15.8268	14.8036
YGL157W	64.882	66.2656	68.5342	66.9467	69.4049	54.8386	52.9504	56.879
YDR252W	12.2558	9.10305	11.1927	11.4643	12.0443	11.2458	11.0203	12.2248
YLR037C	22.2737	19.8091	19.8891	18.7422	22.0446	24.8286	21.2746	20.8347
YMR307W	285.762	264.791	254.696	255.051	268.425	244.485	277.511	248.331
YIL116W	77.4739	78.9987	76.8232	74.8345	90.9051	68.6765	71.6366	70.55
YAL040C	23.546	19.9877	21.731	18.6337	15.1885	16.0282	17.2828	15.0402
YGL232W	55.6315	57.7149	59.0583	55.1731	62.4093	60.6404	61.8031	62.8325
YHR181W	47.5549	51.0579	48.9941	52.0348	67.4004	56.1482	62.244	57.3783
YBR051W	0	1.18792	0	1.8966	1.65915	1.18328	1.42585	0
YPL259C	20.0996	19.371	20.2852	20.4713	20.2627	20.1404	20.3091	19.7197
YDR461C-A	164.233	202.046	182.322	207.331	179.388	222.512	218.223	277.338
YJL087C	5.60061	5.70637	5.77562	5.28105	5.66723	5.43737	5.33027	4.87843
YIR005W	23.7418	26.7076	25.762	27.0394	27.6267	31.398	28.7294	33.2462
YDL080C	13.4336	12.4692	13.3689	12.8792	12.5687	12.8914	11.9832	11.5086
YJL209W	9.15945	9.64042	9.24937	9.43465	9.08038	8.73168	8.54172	8.67934
YLR286C	261.806	229.166	241.577	247.532	261.749	273.319	311.887	274.143
YEL044W	85.9408	92.9894	91.5866	87.6139	98.921	89.93	87.6591	87.2962
YOR371C	6.53257	6.68299	6.88482	6.78335	6.51471	5.67745	6.03733	6.23825
YLR071C	10.4589	10.5184	10.5855	10.4919	11.0518	10.4198	10.6071	10.4643
YBL050W	75.1389	80.4473	78.8518	80.0783	89.892	75.1683	83.242	80.8653
YOR025W	17.4492	17.8449	18.142	18.4079	18.4505	17.5299	16.1032	16.6319
YHL001W	755.761	700.381	704.986	670.368	630.482	690.92	674.724	598.816
YJR042W	19.6431	19.7222	18.9609	18.7674	20.345	18.1208	18.2251	18.2089
YNL185C	62.1405	65.8034	63.8321	70.0166	74.8879	70.9855	70.4907	71.167
YBR129C	23.2703	24.1635	24.7269	24.7506	22.7321	21.7473	20.9985	20.3726
YKL145W	104.76	112.98	104.099	111.942	138.824	114.819	117.58	126.851
YIL015W	37.9968	38.4013	36.1758	37.7098	47.0897	48.5153	52.5869	51.3056
YPL018W	4.69051	5.00691	5.09733	4.87883	5.32086	6.52712	6.17478	5.8931
YLR160C	53.9839	61.5507	57.1796	55.338	57.6631	47.1169	47.397	49.2466
YIL047C	19.4886	17.4329	17.3627	17.1078	15.1982	16.5065	14.7635	14.1642
YBL039C-A	0	0	0	0	0	0	0	0
YOR061W	67.214	68.8283	69.1559	72.3623	86.3292	74.7366	72.9735	72.3441
YJR005C-A	3.09327	4.50001	2.87216	3.50182	3.19455	2.62109	1.95244	2.62977
YLR352W	4.86613	4.87387	5.01205	5.04196	5.56066	4.58463	5.29597	4.82544
YDR068W	36.2271	35.0511	38.0818	37.5464	41.2806	36.9745	36.8332	34.2694
YJL128C	21.2013	21.524	20.9255	20.9016	22.4157	20.2559	19.5698	19.9507
YPL228W	15.8239	16.0859	14.6589	15.645	17.2552	16.3518	15.9168	16.5262
YML036W	43.3566	46.7507	46.4521	45.3583	49.9945	46.415	46.9499	47.558
YKL114C	31.7605	32.9607	31.2648	33.2468	37.7631	33.9362	36.0568	36.2733
YDR078C	5.43903	5.63371	4.56546	4.78825	5.30701	5.25291	4.6547	4.22154
YCR105W	4.19568	4.58779	4.40447	4.50201	5.50267	2.66549	1.31723	2.69842
YJR083C	17.7766	19.2486	19.4892	18.291	22.3544	19.0706	18.9251	20.0875
YDR248C	47.6314	52.0577	53.9209	53.3351	62.9905	65.915	66.6435	64.8304
YPL199C	82.4146	84.5562	86.4509	82.3096	93.7139	41.754	42.861	39.5106
YNL136W	14.089	13.2846	14.6671	14.5671	15.2966	14.7856	13.8248	14.393
YLL045C	1407.67	1366.38	1320.06	1264.62	1355.98	1272.99	1286.57	1211.85
YOR316C-A	12.5464	10.3796	8.80141	10.5086	12.3889	10.258	9.48716	10.6548
YNL264C	37.8448	39.7965	39.2982	40.1503	42.4643	36.0801	37.1875	36.8266
YLR320W	2.69122	2.72747	2.88715	3.05044	2.5141	2.72488	2.60368	2.61628
YBR028C	20.0025	20.3033	19.7511	19.2709	18.9909	22.0489	22.1967	21.6074
YKL098W	22.4391	22.448	21.695	20.1624	19.1566	19.3138	18.5209	19.3435
YBR063C	9.07421	9.40595	9.70152	9.76665	8.99035	11.0903	10.8179	10.8017
YJL052C-A	1.34948	2.39424	4.76289	4.46345	3.46214	2.27614	4.29045	0
YPR060C	61.0032	59.7028	64.9154	61.9061	79.1406	66.1359	64.3672	67.4312
YLL013C	8.68945	7.85093	7.91357	7.82123	7.55426	6.0116	6.87863	7.32608
YKR067W	8.15834	9.47679	8.2316	9.77272	9.42458	8.07054	8.85155	8.75772
YLR040C	17.1446	15.7914	16.9553	16.6759	19.9156	28.5643	30.6574	29.0596
YMR093W	33.0747	33.0549	32.3092	31.2351	39.5103	31.4846	31.1812	32.4375
YIL058W	16.6246	16.602	21.9495	20.5269	17.0537	14.7196	11.2736	13.3058
YHR136C	10.2703	8.94673	7.40579	8.2904	12.9852	18.3885	19.0269	17.7902
YBR078W	554.817	534.156	489.965	530.109	555.708	525.247	592.659	571.103
YCL054W	23.8575	22.9551	23.852	22.0169	25.3374	22.1762	22.6422	22.0696
YIL072W	1.96909	1.95361	2.06992	1.91582	1.67969	1.47902	1.23845	1.43397
YOR231C-A	0	0	0	0	0	0	0	0
YCR016W	48.8754	51.8771	57.6005	54.0623	62.0558	57.2014	51.2513	53.8256
YEL020C	8.74962	8.73634	8.2229	8.31855	8.34242	7.63941	7.52241	8.60856
YPL025C	2.70601	2.11005	2.39521	1.91087	2.41947	2.22596	1.86638	1.77672
YDL136W	1939.3	1914.77	2062.66	1816.71	1963.84	2067.01	2016.03	1848.28
YBR211C	11.0935	12.3538	11.8126	11.887	12.4302	12.2111	10.6138	10.4545
YJL077W-A	0	0	0	0	0	0	0	0
YOR076C	7.41465	7.05782	7.4208	7.82159	8.24507	7.74524	7.34902	7.54977
YDR104C	3.30138	3.14163	3.41304	3.36223	3.03767	2.80077	2.88928	2.98199
YBR279W	38.871	40.7158	40.9893	41.613	46.7817	42.2983	42.8152	40.7656
YLR067C	4.24226	4.03533	4.47921	4.15047	4.28948	4.16285	4.14788	4.03168
YHR219W	5.72322	6.68603	6.2848	3.62147	6.17195	8.27158	5.4863	2.88308
YGR249W	7.40156	6.11412	6.98872	5.2262	2.6552	7.069	4.9858	3.33014
YLR456W	12.2383	15.5096	15.0183	16.827	16.5376	18.9018	14.4185	15.2535
YGR283C	19.4285	20.0239	18.8373	17.8785	21.649	19.5582	18.9189	18.6218
YDL027C	16.5065	16.1282	17.7208	17.7975	18.3528	15.0046	17.5751	16.4842
YKR023W	9.02743	8.25483	9.20814	8.55042	9.72771	9.68478	8.63747	9.06919
YGR028W	19.6836	22.0871	20.3229	21.5829	20.9915	22.52	21.263	22.9275
YCL001W-A	3.89825	4.2517	3.94133	4.08186	3.43548	4.06639	3.74413	4.52297
YDR052C	17.8981	16.3585	18.6741	16.8175	17.4779	16.7625	16.3972	15.6118
YFR035C	93.128	101.116	91.8306	88.8218	97.0472	112.447	115.271	115.1
YJL102W	5.82465	5.49894	5.73586	5.99815	5.66365	7.62883	7.57704	6.98757
YNL336W	8.21593	13.0858	10.9813	10.2412	27.6754	18.0933	23.0661	22.9264
YGL006W	8.73784	8.83559	8.61151	8.84513	8.2581	8.30889	8.10735	8.68566
YDR217C	4.70964	5.16537	4.81861	4.82444	5.00089	4.91291	4.35169	4.32184
YMR194C-A	19.0125	18.1399	19.9983	13.1093	17.9671	19.5101	14.5942	12.4538
YKL033W	4.82486	4.70316	4.86358	4.57275	4.41773	4.85613	4.53162	4.16157
YOR223W	13.9253	16.6159	14.118	16.2306	15.566	16.1679	16.4851	15.9105
YOR032W-A	2.99859	6.34093	3.14863	4.55102	3.33925	3.66625	2.91325	2.21559
YBR260C	14.4687	14.3668	14.113	14.7841	16.3236	16.0997	16.732	16.612
YLR359W	246.749	246.443	229.526	225.315	260.119	227.698	230.867	211.949
YHR062C	32.7853	33.1094	32.0871	32.025	39.537	33.7852	34.0878	36.8392
YDR022C	17.5321	18.1032	19.0228	20.2839	18.9063	27.2897	24.6877	26.5437
YDR459C	13.4205	13.0404	12.8335	12.5178	12.0553	11.491	11.3345	11.5272
YNL184C	7.7075	9.69294	9.04734	9.28548	8.77892	8.13556	12.0754	10.584
YDR293C	17.99	17.2866	18.0572	16.6686	15.3814	13.8187	14.5184	14.7826
YPL195W	20.717	21.1472	20.9504	21.1751	22.7238	19.9344	20.0689	19.9261
YMR173W	174.59	190.159	195.195	193.015	138.518	166.888	164.508	193.803
YDR374W-A	122.156	129.158	130.661	163.412	146.686	150.551	155.174	175.188
YAL007C	157.919	164.683	153.458	170.081	185.691	175.762	187.328	181.915
YGL235W	1.7687	2.18997	2.05799	1.94609	2.25151	2.12396	2.35669	1.90598
YGL134W	14.8243	14.571	15.0824	13.8624	13.4256	13.303	12.8817	12.0504
YER001W	21.2991	19.5805	21.0496	19.3009	14.1496	19.3441	18.886	16.4591
YDR366C	453.658	405.645	461.09	473.308	369.225	371.773	350.308	348.162
YHR023W	7.57421	7.55819	8.03471	7.53846	7.31554	7.79488	7.52023	7.81414
YDR430C	9.25408	10.0417	9.41332	9.74151	10.3486	11.9473	12.5988	12.6707
YGR002C	13.38	14.9852	14.0254	14.9768	16.0134	14.3924	14.9083	14.0953
YNL220W	117.124	115.096	110.002	105.136	128.421	112.619	114.544	106.218
YBR109W-A	7.48979	7.0859	7.46605	7.64711	7.41501	8.48266	11.8406	9.05728
YHR110W	98.5243	109.867	100.509	114.366	114.109	98.6503	98.7224	107.58
YKL136W	16.3381	14.6713	17.285	14.2519	12.3445	17.4553	13.5287	12.4924
YLL067C	0	0	0	0	0	0	0	0
YPL078C	238.571	249.527	260.895	258.689	259.816	266.39	273.658	268.607
YBR073W	22.4456	22.2493	22.2816	21.9801	23.2471	19.4348	18.9292	19.0479
YPL119C	1.8576	2.12889	2.20951	2.16334	2.09989	1.76306	1.82167	1.68866
YOR135C	133.279	155.735	147.448	165.79	171.615	195.115	182.393	175.797
YPL212C	39.1747	40.9096	39.2351	40.0018	46.3216	39.1613	39.6021	39.0728
YGL179C	5.74944	4.94802	5.02453	4.46756	4.53463	5.01557	4.18944	3.94387
YNL159C	16.8109	15.3711	15.1844	14.4344	17.6862	15.7124	16.8011	14.3145
YFR048W	7.99692	9.06244	8.30446	7.84351	9.20064	8.1543	8.24717	8.17862
YDR016C	128.127	136.723	136.367	151.997	144.465	112.477	104.638	126.004
YKL215C	6.71977	6.45661	7.04175	6.68044	6.011	5.38428	5.56735	5.51785
YML035C	19.1182	19.0649	18.1892	18.4478	19.8079	16.8202	17.9307	18.0154
YDL059C	7.8331	9.29993	7.93295	8.53728	9.73938	8.25019	7.5315	7.51791
YOR257W	58.7315	52.9809	57.5168	60.1367	73.123	61.6645	60.2935	60.0692
YNL144C	8.42639	7.29303	8.56287	6.81029	6.6632	9.49466	8.0828	7.04048
YIL172C	0	0	0	0	0	0	0	0
YOR301W	22.8905	23.8378	20.5628	22.1394	21.5849	24.0771	22.5792	21.6635
YHR157W	3.05965	2.96435	2.86089	3.12144	3.3259	8.26117	6.19082	8.00496
YPR152C	8.23428	8.68389	8.39044	8.46935	9.49251	9.78661	9.23387	9.6872
YDR442W	10.5429	9.70953	10.4448	10.5109	12.0832	12.103	9.64841	11.6599
YPL008W	7.87147	7.74051	8.34286	8.10586	7.92093	7.3742	7.66211	7.09003
YMR086C-A	5.5105	5.28243	6.24305	6.42658	3.95914	5.76862	6.06401	3.9095
YGL032C	563.705	589.995	602.877	656.043	697.006	598.386	584.921	576.608
YEL077C	5.47775	5.44033	5.13572	4.78954	5.40766	4.76788	4.49011	4.55153
YGR174W-A	20.5166	22.3343	23.5712	24.6086	20.662	28.3927	21.3862	33.1086
YOR148C	32.2428	32.5223	35.1008	32.2242	31.9097	40.0673	35.9822	35.1877
YHL048W	13.6176	21.9842	10.6864	21.6543	17.1182	20.6863	19.2576	17.1304
YDR114C	0	0	0	0	0	0	0	0
YDR194W-A	2.16766	0	1.34638	0	0	0	2.11046	0
YML062C	14.3812	15.015	14.5021	14.1102	16.0151	17.1419	17.0205	15.9227
YPR085C	11.838	11.0724	12.093	11.2699	11.8575	11.582	10.5612	10.337
YBL095W	9.73335	9.25452	8.21105	8.82852	7.35838	8.42427	7.67289	8.35809
YAR028W	23.6777	25.0226	25.9689	28.9451	27.8637	12.4203	14.3245	12.5267
YGR054W	61.2769	61.6338	59.5578	62.4462	68.6297	57.9236	60.6357	61.8408
YOR096W	1407.27	1392.18	1388.07	1391.72	1347.02	1372.25	1380.89	1287.44
YMR022W	108.631	114.882	115.211	123.371	136.751	115.358	120.702	128.22
YCR027C	31.5316	31.4989	30.4835	34.5158	33.6436	34.2163	35.3862	34.5738
YDL183C	5.45375	4.87757	5.30448	5.02598	4.59764	4.38556	4.41374	3.90229
YJL225W-A	4.33915	2.7204	3.65474	3.9457	2.97627	1.84859	1.40697	2.37287
YNL278W	5.63762	5.30701	5.6045	5.09043	4.99218	4.60334	4.98883	4.66662
YLR395C	881.765	830.561	878.769	907.761	788.081	912.985	866.89	855.092
YDR446W	0	0	0	0	0	0	0	0
YKL023W	22.3491	24.343	25.4998	23.9242	25.1412	28.591	27.2211	26.9273
YPL106C	216.456	240.364	215.767	233.629	296.029	211.723	227.805	255.894
YOR366W	1.33831	0	1.36136	0	1.22586	1.26909	1.28738	0
YIR021W	10.9714	11.9267	10.3517	11.408	11.4272	9.98608	10.3826	10.7297
YJL175W	7.73236	8.73929	8.184	9.17364	9.38035	6.45077	8.07502	8.40612
YLL022C	32.937	33.7515	33.8445	32.4566	36.9312	31.1538	28.6258	28.8243
YDR441C	33.9539	34.3155	29.9909	31.4988	37.5668	32.8052	30.9555	27.0991
YPR002C-A	331.964	314.052	357.777	315.188	318.199	488.735	426.422	461.677
YOR299W	12.6188	12.259	12.521	12.372	12.4528	11.2765	11.65	11.1994
YLR047C	4.67258	4.83975	4.93513	5.23909	4.33526	4.96232	4.73965	4.52471
YMR082C	0	0	0	0	0	0	0	0
YEL023C	5.14011	5.10146	5.33098	4.81239	4.47651	4.56637	4.07604	4.4882
YDR411C	20.569	20.4605	19.3584	19.6737	21.649	19.8681	21.6906	20.2556
YKL025C	17.7713	16.8033	17.658	17.784	20.4136	15.9513	17.4726	16.5072
YLR225C	22.3906	24.2758	22.8938	23.3832	25.9512	42.5714	41.7757	42.9621
YPR029C	21.188	21.6153	21.1581	21.5113	24.4135	18.7113	17.8993	18.849
YDR088C	13.5059	12.3302	14.7384	13.1812	14.1452	15.7264	13.7139	14.3966
YFL004W	29.4916	30.0909	29.2206	31.0896	36.634	33.0055	33.5559	34.584
YDR369C	4.01518	4.09157	4.5249	4.36684	4.76638	4.58767	4.52714	4.67213
YGL090W	6.99511	7.23981	7.40959	6.8089	7.18306	7.33609	6.44418	6.84743
YLR297W	70.6613	66.0223	77.6507	64.9816	42.2038	56.2473	52.0324	42.2283
YDR094W	21.0196	17.0571	17.9383	17.2577	17.0192	16.385	15.7734	17.5296
YNL027W	10.5764	10.1448	10.4907	10.3884	11.514	10.5025	10.4858	10.472
YAL064C-A	3.96641	4.84256	3.65982	4.39107	3.58239	4.05736	3.08883	4.38219
YJL083W	6.26878	5.76016	5.38805	5.19264	4.88917	5.30665	5.60708	4.81086
YKL171W	6.5155	6.354	6.12914	6.00169	5.88268	5.80117	6.14428	5.72472
YOR353C	7.53498	7.269	7.13721	7.00706	8.55514	8.02775	7.20356	7.76272
YJR132W	11.0683	11.3548	10.8494	10.6094	11.0977	11.8544	11.664	11.8766
YLR255C	1.99157	2.87904	2.75701	3.03146	1.55195	2.18276	2.27381	1.68358
YMR013W-A	7.61591	5.21232	5.87641	9.00954	4.89092	9.92056	6.26886	8.90797
YNL144W-A	0	0	0	0	0	0	0	0
YPL060W	4.85455	5.50399	5.18208	4.79978	5.74051	6.32537	5.82836	5.77252
YNL333W	9.38797	10.3983	8.86078	9.44536	11.3936	6.9652	8.25271	7.72092
YCL038C	5.51936	4.91294	5.44078	5.44043	5.51159	5.11721	5.48536	5.2427
YBL035C	13.5069	13.5069	12.3718	12.7517	12.4167	12.1908	11.4119	10.9186
YJL092W	9.19095	8.38452	8.35147	8.28619	7.46417	8.35964	7.44376	7.11626
YGL010W	18.2677	20.5597	20.53	21.0849	18.7266	19.4305	15.6541	18.5553
YML076C	6.93565	7.03971	6.66573	7.17071	6.99971	6.68574	6.94756	6.54525
YDR379W	7.3748	7.27173	7.30472	7.3004	6.83937	6.40242	6.46755	7.01341
YDL029W	110.836	120.154	113.106	118.427	139.641	110.53	115.047	121.626
YDR205W	5.04825	4.67626	4.62576	4.89619	4.7105	4.78773	4.89836	4.5096
YJL031C	21.9578	25.5939	26.4818	26.9338	31.8532	27.7472	26.6572	28.1383
YLR016C	29.2141	31.5335	28.7632	29.6334	28.7149	30.5592	27.0067	25.7332
YOL116W	15.2497	16.8202	15.7091	16.393	18.0556	21.2853	21.8646	21.595
YGR019W	32.127	33.2911	31.7005	31.3913	26.3845	32.9894	32.6686	32.0108
YKL096C-B	1.52499	0	1.41414	4.29557	2.28925	1.45495	1.47778	0
YMR137C	4.98727	4.74057	5.34882	4.85816	4.56308	4.9042	4.36596	4.38239
YLR034C	17.7336	16.2889	15.5713	16.6136	18.9262	15.8365	16.7112	15.2632
YOL041C	46.1553	45.0823	48.4152	46.366	49.1195	45.5947	44.7226	44.4886
YDL198C	53.8259	55.5365	56.4474	53.8145	61.3813	51.63	54.7324	51.918
YPR076W	40.1945	35.2175	34.4972	40.0831	43.933	40.0831	39.4599	41.0427
YHR118C	11.9206	11.5196	11.5545	11.9933	12.6688	11.9302	10.8192	11.8742
YJL097W	104.01	114.191	106.997	112.655	145.015	119.087	133.097	128.202
YDL120W	91.3383	96.6864	97.7938	92.2165	95.8479	96.2541	95.4083	94.1634
YLR292C	138.041	142.718	145.378	143.079	163.288	146.527	149.704	148.282
YPR170W-B	566.122	542.131	532.055	584.673	586.784	613.286	574.432	566.169
YKR091W	15.6555	17.1659	15.5504	18.7247	20.8528	20.4622	18.8949	21.1681
YPR016C	158.745	149.989	147.416	144.459	165.412	146.616	148.139	147.125
YNL103W	21.2119	18.735	18.9467	18.1476	17.4957	18.0181	17.9778	16.9418
YAL012W	320.291	342.358	321.526	326.304	425.857	316.217	346.123	364.58
YJL148W	119.562	119.455	122.183	121.723	138.157	122.995	118.186	123.815
YER039C-A	13.4596	7.56104	11.1287	13.9264	8.51204	18.6464	14.7146	11.1533
YKL162C-A	27.457	22.3473	35.6791	34.9431	36.3589	16.0649	14.7732	18.8423
YDR421W	3.96147	4.1285	4.46917	3.92904	4.14463	4.245	3.9422	3.91651
YGL051W	7.32163	7.23386	7.67407	7.27238	7.97632	7.69105	7.15425	8.94697
YER058W	39.3676	37.8332	43.2725	38.9763	41.938	45.8415	45.3403	51.1415
YNL243W	37.5164	39.0458	37.7039	38.1326	41.4592	34.0346	33.6702	36.6876
YGL220W	203.031	223.146	203.37	240.69	248.747	268.248	272.256	275.11
YDL186W	2.65722	2.26457	2.27286	1.81945	2.55243	2.80744	2.97883	2.66847
YER110C	41.2006	39.3219	39.0268	36.4893	35.8383	35.7773	33.7429	35.7832
YLL027W	57.3805	62.2744	59.1521	58.732	63.5002	50.8451	53.2881	51.2401
YER135C	1.95515	1.5099	2.08814	1.55101	1.59926	4.08338	2.80434	2.48889
YOL060C	15.6731	15.2418	15.2714	15.8367	16.2117	12.7083	15.3087	14.4823
YCL051W	11.2354	10.5215	10.6247	10.4834	10.571	10.0447	9.69021	9.66013
YBL049W	17.2242	18.5541	17.7369	15.2643	18.3425	17.8006	13.8851	15.479
YOL102C	43.3546	47.5384	46.9729	43.8431	52.0274	42.5038	42.9695	46.3995
YGR065C	6.64552	6.71901	6.21651	6.88332	7.72637	6.83648	6.13075	6.62936
YMR292W	87.4108	89.5405	86.4582	91.5856	107.349	87.0095	83.239	84.2746
YBL021C	54.8066	61.9183	56.5524	61.505	60.9365	54.5424	55.8662	60.8786
YPR026W	3.24933	3.30163	2.99542	3.33687	3.16539	3.35692	3.3527	3.38975
YLR421C	163.26	162.757	165.717	185.042	181.705	169.536	161.46	165.173
YHR054W-A	783.07	830.171	717.104	778.75	987.994	956.362	955.512	931.833
YPR154W	130.485	127.122	129.001	133.878	143.393	120.926	132.443	143.51
YAL058W	11.7178	12.3721	10.8839	12.1736	14.8076	13.3292	13.2994	14.3247
YDR119W-A	42.7299	35.8076	39.1829	40.259	36.3607	66.3592	60.8141	54.6513
YJR055W	15.9559	15.6257	16.1275	17.9033	16.93	15.0941	13.1492	15.9422
YMR273C	10.7914	10.9171	10.7695	10.4555	10.5094	9.65526	10.0261	9.65779
YHL008C	9.78436	9.54047	9.30624	8.79983	8.75528	11.0724	10.3348	9.03533
YNL212W	11.8471	11.2539	10.8089	10.3692	11.2567	10.2274	10.3159	10.2869
YDR429C	216.739	215.61	219.718	215.947	254.635	226.153	231.818	232.244
YCL027W	5.70621	5.90891	5.47706	5.31294	10.1102	6.54382	7.43266	7.7254
YCR030C	12.1599	11.9625	12.4497	12.2258	13.6412	12.214	15.7282	13.9893
YGR048W	20.6486	23.1794	20.9819	22.9534	28.0782	22.5123	24.1434	23.4209
YPL249C	9.48031	9.1977	9.87648	9.27557	9.45867	9.24666	8.79392	8.68311
YLR165C	13.5963	13.5602	14.0313	13.0091	11.7146	15.0169	13.0011	10.987
YDR220C	2.35111	4.25132	4.64957	5.46146	3.37405	4.77428	4.87367	4.48464
YDR263C	3.98889	3.70276	3.92817	3.41541	2.96396	5.39565	5.65268	5.52923
YBR187W	85.4719	76.7486	75.7733	75.9016	81.1309	83.2115	84.4601	76.026
YOR244W	15.3633	15.3188	15.3558	14.7655	16.9768	15.501	14.7611	14.7041
YBR201C-A	54.7655	52.9082	45.3661	53.0864	63.3744	68.641	86.9964	82.1271
YBR074W	10.1491	9.91541	10.1348	10.28	10.8024	10.6058	10.7052	9.7451
YDL195W	50.2495	46.7949	48.932	47.4375	47.0259	40.2937	45.9545	46.0818
YDR007W	53.9492	57.1225	56.0701	54.2601	55.2538	47.4805	50.0749	53.4154
YOL014W	39.5149	42.2778	35.9941	41.7889	70.6534	73.6934	77.1862	63.348
YLR059C	69.4768	73.8387	71.0016	78.0025	82.9445	70.7578	74.2264	75.021
YML130C	23.6608	23.3392	21.9963	23.6983	28.5955	21.3847	23.6201	24.7172
YBR223C	5.46972	6.80989	6.16579	6.74996	5.75158	5.8728	6.1175	5.92651
YCR018C-A	172.809	140.182	162.517	191.162	147.864	257.611	219.212	205.911
YER019W	27.1671	27.707	24.593	23.2196	24.6661	24.4629	23.5367	21.1098
YIR016W	24.9376	25.4829	24.967	25.9428	21.0084	19.5886	19.0563	20.2047
YIL069C	1265.35	1182.09	1257.62	1107.9	1074.48	1226.61	1190.79	1006.9
YLR440C	11.2706	11.5562	11.0911	10.8051	10.5158	10.8837	10.5646	9.9653
YIL102C	1.58168	2.23039	1.60095	2.63049	2.11001	1.76725	1.7577	1.7669
YER042W	31.8269	30.7164	38.8312	35.5262	37.4341	34.3715	34.6255	34.1802
YBL069W	24.0225	24.4988	23.3446	22.4781	21.6399	25.4204	23.2345	23.6767
YML116W	6.62461	5.80001	5.48335	5.7928	5.36	6.21228	5.99806	4.80986
YHR058C	17.951	17.5183	18.6118	16.1674	18.6062	18.8494	19.9367	18.4693
YMR265C	13.4674	14.4632	13.3729	13.1577	13.8405	14.3115	13.7981	14.0019
YDL169C	4.5383	5.4946	6.56901	6.44948	3.58396	4.70506	4.29413	4.61424
YPL109C	4.44704	4.39417	4.6011	4.38534	3.85105	4.17082	4.05087	3.86172
YPL204W	55.5549	53.3906	56.4091	53.546	56.7475	53.0305	52.631	50.7504
YLR365W	1.07375	0	1.00516	0	0	0	0	0
YOR047C	30.1802	27.7305	29.0377	28.5896	28.0812	27.5296	25.9951	22.344
YLR222C	22.071	21.6112	21.0064	19.692	23.0429	20.5768	19.4439	19.3415
YPR183W	256.662	285.641	262.206	286.569	310.266	277.378	300.25	311.538
YOR396C-A	3.44094	1.33817	1.6545	1.06507	1.6946	0	0	0
YER077C	8.19826	8.10463	7.84944	7.76907	7.8592	9.06017	8.49892	8.03159
YDR348C	30.4379	29.26	30.4861	29.9825	29.2272	29.0417	29.8739	28.6015
YKL030W	48.5841	49.5808	52.6	46.3048	52.6936	48.3015	44.9124	42.5756
YGR295C	41.182	40.0991	39.1072	38.8874	44.7294	31.6226	34.6194	30.5927
YER039C	4.42382	4.41217	3.76291	3.80027	3.31578	3.96089	3.72356	4.2184
YPL230W	17.2677	14.0538	17.2206	14.757	6.92503	12.0382	9.79428	8.97447
YFL007W	10.5733	10.6705	10.3936	10.6419	9.89279	9.20256	9.10615	9.69387
YLR371W	6.61706	6.68977	7.21409	6.72392	6.12758	6.04958	6.19867	6.31103
YMR061W	18.0764	19.5281	19.5493	19.3596	21.9704	18.2446	17.9552	16.9108
YPL159C	32.6508	35.9648	35.6397	35.5164	36.8351	30.1165	31.7998	31.9058
YMR288W	5.67027	6.13644	5.96066	5.68188	5.93345	5.7936	5.37946	5.54739
YMR166C	13.3132	14.691	14.4116	15.4185	15.2684	13.6782	15.6577	15.9645
YHR142W	30.458	29.0136	28.0376	29.0136	32.423	31.9195	33.8934	29.8011
YJR111C	16.9307	16.1988	15.444	15.2872	17.4351	16.2927	13.6556	16.1294
YPL152W	11.9953	13.3068	12.2642	11.9587	15.1141	12.025	11.4524	11.9715
YJR113C	61.2744	61.7768	59.6697	67.4714	67.7542	58.5541	56.7818	60.3522
YDR230W	42.1842	53.3713	44.9647	46.7583	47.878	48.8146	51.9708	51.2718
YDR131C	8.39238	8.51818	9.00813	8.86619	8.92488	8.44495	8.75968	8.40924
YEL020W-A	180.234	184.249	187.802	195.605	215.968	221.308	212.536	243.136
YLR116W	18.8925	17.7001	18.5678	18.0039	18.5122	17.2051	17.9198	17.9824
YIR040C	2.53884	2.12741	1.39051	1.57715	1.90396	0	0	1.3022
YLR013W	0	0	0	0	0	0	0	0
YBR125C	16.1539	16.421	15.6452	15.9705	16.7214	15.7273	15.7181	14.3767
YPL216W	4.23553	4.73904	4.33178	4.20253	3.98942	3.82634	3.78965	3.65411
YOR290C	11.6529	11.5995	12.3667	11.7653	11.3804	10.3233	9.90558	11.1353
YEL012W	28.5318	29.4194	29.8034	32.7374	29.2367	27.5144	26.4892	25.9696
YLR179C	297.724	311.47	285.649	285.25	367.987	372.923	396.027	382.325
YDR297W	82.7412	79.9322	81.318	81.9597	84.2051	103.404	108.11	99.9068
YBR191W	2605.94	2801.4	2795.5	2553.52	2708.53	2814.74	2708.98	2441.72
YKL060C	6275.52	6559.7	6074.02	5795.06	6692.95	5960.1	6337.05	6350.24
YDL215C	7.72566	7.82652	7.52961	7.83416	7.12915	6.3137	6.30011	6.15297
YJL205C	516.372	551.122	547.569	503.087	517.507	577.604	551.257	557.367
YGL133W	8.21656	7.93668	8.52844	7.56976	7.0318	11.3648	10.9321	10.2478
YOR355W	44.8449	39.1508	41.3739	37.6147	29.9445	38.1658	32.8217	29.1381
YIL061C	13.8846	12.5488	13.6736	12.4869	14.2924	11.1418	12.0192	11.297
YGR078C	116.277	126.242	124.288	134.356	151.982	118.969	125.262	130.513
YJR020W	14.3049	14.4355	16.7441	17.6578	15.5411	15.2168	14.7445	11.575
YAR068W	5.98095	3.35492	5.49363	5.12795	4.77311	3.5935	2.13746	3.05573
YLR417W	8.91364	9.74451	9.63224	9.05637	9.75306	8.45437	8.4308	7.92492
YDL129W	12.3747	11.9109	11.8103	12.5938	12.8343	14.2973	13.0514	13.7313
YPR064W	2.76916	2.96597	4.18008	3.22737	2.89367	3.16091	2.26029	3.67699
YPL082C	8.8006	7.74758	8.17195	7.79455	6.49878	7.00169	6.40414	6.15929
YMR101C	1.58123	1.43824	1.6076	1.96379	2.0579	0	0	0
YBR299W	1.01083	1.19442	1.02222	0	1.24472	0	0	0
YDL088C	22.3808	21.3406	21.73	21.7725	23.8101	20.5012	20.6722	21.2572
YKR034W	0	0	0	0	0	0	0	0
YOR199W	26.3937	19.3723	18.5385	23.2248	24.031	19.5787	22.0091	23.2583
YOR005C	3.40655	3.50432	3.59057	3.28257	3.40543	3.45326	3.33181	2.85054
YCR081W	3.61409	3.29956	3.45042	3.33222	3.64566	3.15727	3.0493	3.2725
YHR143W-A	901.931	844.7	912.4	970.264	1023.06	915.671	847.476	986.806
YMR296C	54.8371	56.069	52.5847	55.6173	64.9422	58.3357	59.7723	57.1251
YMR212C	11.1706	11.4901	11.15	10.675	12.0415	11.0264	11.5103	10.7338
YDR039C	3.39798	3.08051	2.99829	2.73464	3.42792	2.45035	2.71869	2.51456
YFL027C	13.363	12.6597	12.9472	12.9962	14.4578	13.2341	13.042	13.0151
YJL075C	21.5707	18.1777	21.7579	24.1382	18.2177	22.099	21.9061	19.9134
YBR219C	1.2355	0	1.50417	1.43232	0	1.74084	1.05041	0
YBL032W	103.298	100.947	99.2146	96.7456	101.789	87.3526	85.5641	80.5681
YFR039C	11.4155	10.8634	11.0842	11.5301	12.4504	11.4503	12.2907	11.0617
YER184C	2.80932	2.70527	2.63481	2.76111	2.55814	2.43935	2.15353	2.30244
YBR114W	7.30753	6.80433	7.1471	6.39828	5.54378	5.8677	5.54022	5.66875
YBR267W	37.329	37.0807	35.6824	35.6879	39.931	34.8664	36.0923	34.1799
YIL009C-A	49.1976	51.1647	48.3462	49.5882	54.0111	48.1882	48.3876	47.7823
YMR153C-A	33.0142	33.6693	32.3769	29.9501	32.7306	33.4987	31.2397	30.2387
YPL035C	32.5063	29.1428	33.1077	35.9787	31.1942	34.5412	30.0716	29.3737
YDR075W	22.7496	21.4933	23.0442	22.1672	22.3364	21.1008	19.4061	19.1152
YER060W-A	7.82017	7.55166	7.85041	6.22929	5.3847	7.31159	6.70662	5.70569
YNL135C	1662.55	1748.42	1744.37	1895.65	2113.52	1777.49	1829.02	2049
YPR107C	23.9328	22.2623	25.5003	24.974	25.9855	25.6062	26.4183	24.8567
YOL001W	10.9761	10.0026	10.7559	10.6973	9.70626	10.0957	9.86514	9.35062
YNL032W	32.0873	31.4807	31.4414	32.2327	31.4625	30.7878	29.6665	30.515
YHR060W	52.2843	56.8602	60.9289	60.6128	69.6993	60.069	59.6645	58.1015
YOR187W	126.852	125.518	114.711	114.806	148.93	120.458	140.96	133.231
YMR127C	17.8549	17.2754	16.6568	18.1538	17.401	17.4912	15.1792	15.9567
YDL223C	5.05978	4.58126	4.95344	4.75817	3.33394	3.28526	3.05691	3.49053
YDR156W	172.204	186.895	179.443	175.787	219.255	194.454	176.9	194.086
YDR167W	61.8668	65.4411	64.4392	64.2545	79.3588	61.9994	64.4269	68.0068
YLL065W	0	0	0	0	0	0	0	0
YGR281W	6.28112	6.24747	6.80664	6.77753	6.00654	5.93056	6.06251	5.70785
YIL060W	7.0926	8.75939	11.0113	6.89458	7.82744	8.42616	7.72652	7.18249
YJL015C	4.78695	4.10692	4.50305	3.42114	2.35638	3.03992	2.8581	1.60311
YPL146C	30.3624	29.2325	31.2026	28.9542	28.6482	29.4663	26.1349	25.8328
YGL148W	171.032	181.352	168.422	172.964	213.957	183.997	187.444	184.536
YPR133W-A	3497.88	3809.13	3978.56	4113.7	4525.23	4294.92	4168.87	4432.28
YAL044C	508.301	500.303	486.064	487.691	541.909	548.693	554.823	537.557
YOR151C	30.1593	31.0581	31.0037	30.3444	29.3914	27.7709	27.4288	28.2982
YNL046W	64.4565	62.2771	57.384	57.3465	57.9154	54.5102	49.9095	50.9372
YJL003W	54.6236	59.0156	54.2071	59.4622	54.5412	55.2239	54.1767	55.4389
YEL058W	39.9991	43.2709	40.7546	42.5718	53.3197	42.3006	43.0132	47.0161
YNL325C	3.43209	3.46459	3.44584	3.36651	3.58268	3.19907	3.36026	2.99458
YLR369W	11.391	11.8624	10.9255	11.0055	11.9337	11.1138	11.1356	10.5703
YGL004C	15.8579	17.3031	15.6879	17.1192	21.2609	16.9774	17.852	19.4421
YJL196C	85.6538	87.9074	78.054	80.495	87.6358	76.1712	83.7194	83.453
YPR015C	3.89951	3.98122	4.34902	4.47172	5.281	5.04495	5.56297	4.78789
YMR013C	5.87946	5.67303	5.50449	5.42845	5.16006	5.51695	5.52733	4.52731
YHL013C	20.1043	19.2725	20.9289	20.8778	25.0437	21.6063	21.4637	20.8497
YER165W	243.902	247.229	237.48	236.584	260.398	231.505	234.23	247.925
YIL089W	9.3282	10.0558	10.484	9.71768	8.38383	7.26407	6.82284	6.99713
YNL062C	30.3084	30.4738	29.0779	30.7902	36.0105	29.48	29.8197	30.6235
YML059C	5.19034	5.23166	4.93288	4.81691	4.44511	4.99867	5.04076	4.85371
YML086C	35.1828	35.1095	33.0535	34.557	42.1643	31.0329	36.57	35.1004
YPL036W	1.89289	1.62857	1.58726	1.61877	1.09282	1.25813	0	0
YOR161C-C	19.6154	21.6313	10.4515	10.5573	14.3258	8.43658	10.9135	18.1868
YBL061C	16.1126	16.3424	16.3649	16.8657	20.2591	16.4094	17.1301	18.1578
YIL166C	4.2239	3.61068	4.03754	3.77791	3.69345	4.20088	3.63097	3.32415
YHR216W	13.7468	11.6666	12.0943	10.3663	18.3172	24.3079	17.6891	12.6407
YER182W	37.4941	40.3304	37.6136	39.7146	40.8751	41.79	40.8466	40.5706
YGR190C	41.937	43.2403	41.0092	43.6271	40.3185	41.5147	39.3507	40.2079
YKR005C	1.63262	1.74741	1.6774	1.81821	1.81033	1.07582	1.25537	1.01995
YJR162C	0	0	0	0	0	0	0	0
YMR186W	293.615	344.819	302.339	344.343	530.15	316.691	357.933	432.289
YJL152W	53.3827	54.9328	51.2999	52.7211	56.4001	40.3389	47.5599	58.3639
YMR169C	10.5087	10.5125	11.1959	9.61035	3.1433	4.57324	3.47935	4.21324
YDR274C	35.7151	30.2683	36.107	32.552	27.8358	22.8343	20.0145	21.1328
YBL083C	12.4228	12.2521	10.4452	16.2172	11.1767	11.9027	12.901	11.3619
YCL056C	31.1178	29.4982	35.7523	35.2799	34.9898	33.9492	28.595	32.4598
YGL223C	22.441	22.5578	22.7605	22.7637	25.5437	22.4466	21.7948	23.1737
YJL098W	12.507	12.2852	12.3179	10.7671	10.4681	10.4123	10.2644	9.75116
YOR396W	9.00173	8.81191	8.17869	8.21105	7.44632	6.12278	5.94266	5.84432
YJL120W	2.02674	1.73093	1.41968	0	0	1.3166	1.19507	1.79654
YLR332W	16.4657	12.9832	13.5506	13.0259	16.886	13.9	16.7978	15.0245
YNL285W	30.9784	28.0331	28.2421	29.7253	26.4299	36.8035	33.8638	32.7738
YIL029W-A	5.87826	6.3872	5.08284	5.84213	7.3581	5.22861	5.97575	5.99923
YOL066C	13.4445	14.3726	13.6161	13.1353	16.0323	17.0286	17.4822	17.5038
YNL247W	61.6817	62.3148	62.1886	61.4694	74.8153	63.4078	63.7253	65.2494
YPR102C	1444.03	1398.67	1377.25	1306.46	1355.36	1358.35	1362.85	1292.08
YBR287W	31.5499	30.7602	29.3543	30.3036	30.4673	31.621	33.5773	31.2932
YGL007C-A	6.83886	6.04887	5.4395	14.405	5.73943	7.20412	5.00527	7.35747
YGL175C	3.2559	3.56004	3.37538	4.13353	3.7584	3.80818	3.02507	3.43997
YHR071W	106.659	110.063	99.7167	107.389	84.133	99.0008	107.113	109.538
YIL095W	7.06714	7.33997	7.09788	7.05414	7.80379	7.85523	7.81947	7.43417
YHR107C	50.2126	53.0483	51.601	50.0921	59.1302	51.7808	49.5945	50.3765
YOL166W-A	0	0	0	0	0	0	0	0
YLR050C	70.4203	75.4004	76.5614	73.4699	85.0906	85.8667	87.1995	90.6757
YCR010C	2.04766	1.88651	1.65555	1.58707	1.76338	0	0	0
YNL161W	16.2268	14.7933	15.7241	14.7522	15.84	13.6073	14.0556	13.3116
YOR055W	4.73916	6.46914	5.90558	6.41919	6.16289	5.98291	5.25512	6.21873
YGL063C-A	0	0	0	0	0	0	0	0
YMR306W	1.35482	1.27302	1.32442	1.07737	1.09017	1.17487	1.12787	0
YAR066W	4.46539	4.93161	4.43906	5.66367	4.12164	4.61879	4.7605	5.0525
YGL128C	16.5811	16.2743	15.3493	14.8204	16.8142	16.4086	14.6479	17.3084
YPR048W	9.64213	9.28576	8.97102	9.15014	11.4053	8.6661	8.79033	8.74449
YLR345W	19.073	18.4627	19.9968	20.1335	17.9857	20.2272	18.8693	18.7729
YPR140W	26.1205	28.2208	27.721	29.7016	30.223	27.9948	28.9594	28.1729
YKL208W	12.5365	14.7247	12.9276	13.0145	13.7053	9.23276	9.95941	9.46619
Q0045	0	0	0	0	0	0	0	0
YKL058W	196.738	181.584	189.709	213.124	208.504	197.184	184.924	203.108
YGL030W	3061.3	2961.84	2936.68	2793.08	3109.73	2722.07	2771.63	2795.26
YHR209W	12.1821	14.7977	13.2923	14.8202	15.3485	11.9516	12.7553	11.276
YJL082W	9.6013	9.24585	9.75074	9.38148	8.72584	8.86798	8.98118	8.75585
YKR017C	6.01217	5.5236	5.33899	5.51934	5.21589	5.59246	5.25558	4.88802
YER126C	100.539	101.365	107.875	106.455	121.969	105.258	111.393	105.748
YDR110W	11.5651	12.0251	12.4251	11.5926	13.0005	12.1332	11.6217	11.9026
YKR040C	8.27063	8.14864	7.29633	6.98536	7.79636	7.53622	6.97604	6.70114
YGL033W	1.80224	2.6194	2.61592	3.25443	3.98808	25.8107	25.6471	27.7593
YKL046C	35.5605	34.9905	32.2413	34.345	40.1117	33.2709	35.7021	36.148
YLR236C	6.83554	8.03647	7.80323	8.5528	8.71116	6.53864	7.8749	8.02454
YGR165W	38.7414	42.1923	38.8169	40.3064	44.3106	36.6447	36.2642	38.846
YML103C	13.3277	13.5153	14.3195	13.6531	13.7757	12.4438	12.7285	12.8061
YFL010W-A	210.953	214.544	187.12	194.879	213.915	172.529	205.784	190.362
YNL338W	0	0	0	0	0	0	0	0
YGR193C	55.4853	60.8659	57.9642	59.7267	71.6447	56.0052	57.5331	59.2544
YJL197C-A	0	0	0	0	0	0	0	0
YLR439W	41.1089	39.9299	40.9449	41.5271	47.1382	39.9455	41.2175	43.6821
YKL001C	20.8354	20.114	20.4894	18.7099	17.0638	16.7232	18.5009	14.838
YKL078W	8.61832	7.95101	8.00329	7.52395	9.18559	8.08571	7.11597	7.79198
YJL062W	9.12854	9.03292	8.83571	9.05556	9.26577	8.39729	9.04642	8.72134
YPL245W	16.4791	14.668	15.155	14.6763	16.3595	15.3829	13.1145	14.8861
YBR058C-A	446.396	468.38	471.654	513.678	562.129	519.118	512.251	580.676
YNL106C	4.97239	4.82092	4.7478	4.94574	5.22922	4.96796	4.89934	5.05373
YNL204C	3.46022	3.78344	4.08512	3.48976	3.07894	3.42079	2.8896	2.69328
YDR211W	34.3711	36.0783	35.1197	34.0288	41.4361	31.2121	30.8602	31.4399
YDL109C	3.98619	3.96274	4.14598	3.98964	3.90837	4.39732	3.9455	3.48223
YIL111W	240.996	267.484	262.377	274.276	222.277	218.304	223.46	220.617
YOR117W	71.5578	77.0162	72.7497	77.1158	97.9518	74.2624	80.1589	81.5606
YOR074C	45.575	51.4151	48.6393	50.0298	56.7908	47.1687	52.5508	51.1922
YKL223W	0	0	0	0	0	0	0	0
YPL170W	132.659	141.35	129.145	147.526	146.461	114.409	113.981	118.008
YHR072W	25.406	25.0704	25.7376	25.8015	29.2684	30.8095	30.1555	30.2369
YOR077W	9.7569	8.91284	9.37265	9.37899	10.2915	8.40232	8.36504	7.91712
YAL043C	17.6439	18.8402	18.6683	18.9695	19.8959	16.4392	16.8853	17.2308
YPL283W-A	10.6937	9.17082	10.8076	9.20997	15.2029	10.8304	9.25932	10.6768
YEL075W-A	2.17644	1.63678	1.99254	2.48679	2.91633	1.90281	1.4955	2.21369
YPL115C	8.67844	7.95669	8.36479	8.0767	8.03986	7.36183	7.50349	7.17192
YBR268W	184.334	189.209	205.549	185.121	204.012	188.714	181.096	187.231
YJR022W	19.4614	20.7905	20.5681	22.8716	28.0294	21.7895	19.8697	22.9026
YER025W	121.995	120.699	115.003	114.272	137.299	115.562	117.501	119.123
YPL226W	37.1601	34.1643	34.5122	34.2002	32.477	31.722	30.4541	30.8103
YLR348C	35.8629	37.7651	36.1399	37.8493	39.4325	49.017	52.839	48.2851
YNL320W	16.38	16.3999	14.2187	15.0991	17.6757	14.9942	16.1556	14.8341
YEL070W	0	0	0	0	0	0	0	0
YMR034C	2.37597	2.47626	2.40048	2.47882	2.82946	2.44418	2.27519	2.13212
YJL178C	60.1963	60.47	60.4789	61.9301	75.708	62.6895	67.1634	65.589
YMR310C	44.2421	41.7486	41.0501	41.9256	52.5775	41.8476	42.3035	43.6465
YKL132C	4.90655	4.44909	5.24761	3.79321	3.95155	4.91888	3.88556	3.38945
YBR286W	215.175	217.621	204.249	214.843	249.099	209.368	257.279	244.042
YKR032W	0	0	0	0	0	0	0	0
YOL163W	1.11501	0	1.16029	1.21088	1.10858	0	0	0
YDR524C-A	14.8443	11.9712	8.16273	6.69517	9.23236	9.10456	7.5083	4.6865
YGR044C	53.3399	56.7727	53.9931	56.3637	49.5055	50.3634	48.1864	47.657
YJL133C-A	87.861	92.1167	99.4584	83.0258	61.6016	66.4475	53.145	68.2126
YCR023C	13.4929	14.0552	13.0486	13.5454	13.3382	13.0815	13.0329	13.0802
YLR057W	8.41851	8.5768	7.89299	8.5612	9.3478	8.12279	7.94236	8.17833
YIL024C	8.5626	8.52137	8.92748	8.47701	10.9467	6.37255	8.52125	8.00374
YHR131W-A	11.5331	7.64209	13.4344	8.61264	12.6238	9.06367	7.71153	11.8617
YJL141C	12.7964	12.0132	14.0709	12.1083	9.23019	11.0623	9.99312	9.49876
YPR192W	6.32007	6.39424	6.49911	5.36985	4.21296	3.17285	2.63598	2.48118
YOR304W	10.0811	9.90621	10.4198	9.86206	10.0946	10.2927	9.39883	9.31112
YLR009W	165.543	159.332	169.982	157.916	173.473	174.424	152.176	143.871
YDL050C	89.9701	86.8383	89.7807	81.6339	92.8874	85.62	85.7854	76.8052
YEL048C	16.2803	12.7752	13.289	12.9366	13.0791	11.3872	10.7609	12.5233
YBR196C-A	19.8249	22.1054	20.505	15.7504	14.4986	21.0967	11.8223	17.4101
YLL024C	589.606	686.029	592.329	644.803	993.658	574.898	654.027	790.443
YOR255W	0	0	0	0	0	0	0	0
YNL141W	99.0739	98.1361	96.8548	94.4887	104.787	118.772	117.951	125.366
YDR535C	1.58542	1.5262	1.55936	2.08109	1.79461	0	0	0
YML034W	11.2347	11.1166	11.1326	11.0324	10.8778	10.0435	9.82988	9.97208
YDR202C	18.122	18.4699	19.3621	19.3039	19.4622	20.4681	19.6731	19.8064
YBL091C-A	47.3276	48.6552	44.398	51.2821	44.6379	53.9938	53.6002	54.5292
YER099C	37.0645	36.8398	35.2944	33.7449	39.8519	31.7822	33.9877	31.7319
YGL002W	41.5441	46.2651	47.7892	44.4926	47.2456	53.3483	46.6867	44.0056
YMR131C	91.6266	89.9609	87.9571	87.7169	103.535	82.381	82.6201	85.7204
YGL123C-A	0	0	0	0	0	0	0	0
YLL048C	12.4386	12.223	12.2344	12.5919	12.2198	12.1823	12.5532	12.7737
YPL150W	6.66227	6.3831	6.51676	6.5542	6.272	6.63847	6.65426	6.111
YBR113W	21.8844	17.4401	22.4762	21.1333	20.2383	19.1073	18.9454	21.8331
YCL067C	12.7627	13.5499	13.5457	12.3162	11.0017	12.8092	11.764	11.4827
YMR263W	42.1457	42.9935	43.395	44.4883	46.395	46.6765	42.5515	43.3958
YOR289W	20.2741	20.154	21.6573	20.9807	15.5256	24.2059	22.0148	21.8082
YCL025C	18.4299	17.147	18.199	15.7144	15.6525	16.8051	16.317	13.4493
YDL132W	20.1901	19.6732	20.6008	21.0401	22.1401	18.434	18.7349	19.0814
YKL186C	119.258	129.527	139.379	133.825	150.565	115.982	115.433	116.134
YCL043C	251.548	259.852	237.352	259.488	287.547	259.328	308.077	287.441
YOL100W	7.19082	7.22745	7.9102	7.7895	7.61232	7.53804	7.42644	7.09786
YML031C-A	2.74121	3.74905	3.30895	2.93558	4.49033	2.39697	3.40498	2.26768
YDR034C-A	1016.77	1005.52	930.856	961.946	837.07	1091.07	978.103	1024.79
YOR337W	9.86467	9.62794	9.64163	9.3083	9.01322	7.55304	7.30952	7.67518
YDL013W	11.2902	10.4382	11.2746	10.8223	9.82202	10.4228	9.81237	9.58951
YDR534C	1.82034	1.85416	1.45676	1.73055	1.35759	0	0	0
YLR157C	53.9839	61.5507	57.1796	55.338	57.6631	47.1169	47.397	49.2466
YGL039W	28.6631	28.5448	28.4008	28.5137	41.7763	19.5467	19.7333	19.4591
YCR012W	1676.37	1728.45	1579.39	1577.86	1839.88	1415.34	1500.94	1562.6
YOL086W-A	148.182	145.176	150.621	157.006	146.446	163.636	157.844	153.37
YHR049W	148.042	155.356	150.154	154.345	171.119	152.554	161.592	163.733
YMR113W	11.7527	11.1553	10.808	10.5965	12.9066	11.0064	11.6262	10.5863
YPL055C	25.0731	25.9132	27.3543	26.5311	30.396	25.2242	27.6247	28.3387
YBR213W	11.3895	11.9667	11.0846	11.7005	14.5424	11.7347	11.6883	13.4631
YLR226W	9.76763	9.85236	10.1591	9.5536	9.76249	8.27153	8.92902	8.64763
YCR075C	17.3938	19.2745	15.7638	16.3921	15.9932	14.4664	14.2348	14.2613
YDR392W	17.6818	18.5273	19.1747	19.5981	21.1574	18.611	18.0676	16.6567
YAL051W	6.56223	7.01781	7.1868	6.59589	6.37216	5.57619	5.558	4.98211
YPL079W	1786.87	1787.14	1679.99	1541.44	1869.71	1758.71	1772	1670.94
YDR178W	162.314	169.679	168.806	176.663	187.456	179.187	172.928	194.315
YDR121W	48.1504	52.2514	49.706	49.8382	64.8573	52.1162	52.63	55.504
YJL013C	12.2004	11.5322	13.2542	13.2148	12.729	12.744	12.2213	10.9832
YDL063C	24.5984	24.2172	22.2348	22.6593	26.6823	21.7728	20.8178	20.9733
Q0060	0	0	0	0	0	0	0	0
YJL109C	14.9396	13.927	13.9289	13.4344	12.432	12.6987	11.6546	11.638
YJR155W	6.30726	6.1576	6.40192	6.58933	4.2475	5.3671	4.73309	4.47994
YKL177W	1.56069	1.90853	1.49791	1.29663	1.82554	1.27514	1.54282	0
YDR435C	15.7544	17.0186	15.5007	17.1291	18.3377	16.2339	17.5215	17.0389
YIL012W	1.23893	1.21372	1.58581	0	1.11173	0	0	0
YDR461W	8467.22	7868.4	9791.58	8289.81	9429.65	7818.78	7598.65	8458.33
YHR111W	18.4702	19.959	17.9789	18.7843	21.1799	18.9029	19.4092	21.0179
YNL033W	4.31519	2.4835	3.36024	3.34434	4.58717	3.93205	3.06584	3.23749
YDR455C	6.49624	8.9078	5.80759	5.93804	7.81885	6.15423	7.11312	4.74678
YKL072W	6.19008	5.68937	6.10638	6.03634	6.30789	5.85662	5.67987	5.45008
YKL003C	135.534	133.623	137.705	147.976	157.072	145.366	136.769	143.569
YMR314W	214.458	226.048	211.308	230.103	270.529	200.89	216.704	227.345
YHR139C-A	4.12922	3.3444	3.07329	2.78544	4.04368	3.12276	3.49635	2.98837
YLR070C	3.6907	3.18029	3.47551	3.24495	2.74352	3.90387	3.75584	3.30846
YDL069C	8.61198	9.26346	11.4065	10.3685	10.4431	11.9989	11.9135	11.1467
YBR183W	14.98	16.3515	16.1708	14.5169	16.7282	13.8719	14.8476	12.9383
YER026C	100.9	102.177	91.6357	104.734	118.224	100.133	109.164	116.32
YOL083C-A	0	0	0	0	0	0	0	0
YDR073W	68.1218	62.4834	64.0178	63.8233	65.2476	52.3218	47.6046	49.7365
YDL017W	6.91648	6.49256	6.26812	6.3229	7.23825	6.82669	6.06389	6.40455
YCR093W	12.0044	11.3449	11.4867	10.98	10.0625	9.97747	9.99632	9.94461
YML051W	42.2414	41.4352	42.039	43.3415	42.588	41.6812	40.7035	41.3387
YLL002W	9.67102	9.64501	9.35643	9.2649	9.6897	9.27774	8.87191	8.81257
YPL068C	20.2581	17.3602	18.3032	18.2745	20.0533	13.3281	13.2513	15.5468
YIL090W	17.7276	16.1251	15.6758	14.7828	17.4643	15.1252	15.3876	14.769
YNL018C	1.26227	1.4814	1.48515	1.50996	1.92103	13.0022	15.2921	15.5004
YBR050C	1.74356	2.20004	1.88212	2.10395	2.14059	2.12483	2.23516	2.21002
YMR081C	21.9309	17.1951	20.8163	17.2461	9.86716	18.0994	16.1573	12.5401
YBL097W	5.10912	4.74191	5.08159	4.47843	4.9479	4.68642	4.32889	4.32708
YJL049W	9.42892	10.089	10.8474	10.5007	10.2986	9.97715	9.35739	8.67507
YLR334C	3.16118	3.02331	2.64413	2.51999	2.95039	3.15209	3.06648	3.24511
YMR231W	6.23836	5.95373	6.09158	5.98239	5.72522	5.84073	5.83115	5.90292
YGR107W	3.22868	2.22664	3.06393	2.20468	2.55286	2.34803	2.55273	1.68403
YBR172C	27.6913	25.1411	26.3531	25.6161	24.7785	24.3199	24.8754	22.9607
YIL021C-A	0	0	0	0	0	0	0	0
YDR260C	40.2203	44.6334	45.0642	50.1528	47.2634	44.7742	43.0153	44.2788
YKL165C	8.7666	8.62749	8.60842	8.86215	8.30281	8.48507	9.50181	8.95171
YPR175W	9.65439	9.93938	10.1821	9.54769	11.3444	9.80467	10.3981	10.0825
YOR097C	40.7098	46.4026	45.6842	46.858	45.6852	46.0797	41.6469	41.3588
YDR210W	0	0	0	0	0	0	0	0
YLR062C	747.61	741.5	717.589	749.124	672.907	770.026	812.429	711.694
YNL024C	7.78252	6.52062	5.85997	5.14789	5.46072	3.92426	4.56674	4.38748
YLR339C	521.805	518.697	477.146	509.238	498.773	506.964	540.182	524.033
YLR305C	8.40771	8.43203	8.57	8.03739	7.84678	7.30553	7.41909	7.36138
YNR024W	32.9246	32.6677	32.8816	34.1884	37.4879	33.3327	32.9228	31.7179
YDL130W-A	481.715	555.301	569.133	575.256	491.523	698.048	668.112	702.21
YPR022C	10.9541	9.55032	10.4354	9.7599	9.85607	8.66325	8.76936	8.80272
YPL161C	7.48595	8.15009	8.08445	8.12542	9.40853	7.92378	8.0237	7.73786
YLR107W	17.3024	19.2444	19.1531	17.9814	19.6849	17.5038	16.8203	17.5706
YJR135C	10.3935	10.8555	11.0409	11.0499	11.0566	11.0035	10.6666	9.87619
YLR139C	8.49458	7.94262	8.06726	7.59448	8.27025	6.74123	7.53979	6.58124
YKL085W	169.509	178.022	177.523	174.637	169.543	204.161	207.402	214.504
YGR017W	80.5642	80.8439	87.9685	91.5815	93.6058	89.0625	90.4827	86.9115
YDR322C-A	320.962	325.247	330.831	332.089	324.006	349.073	349.181	366.09
YFL021C-A	4.19531	3.168	3.64435	3.39896	2.52186	2.56241	2.66852	2.43139
YOL123W	54.31	53.6873	51.582	51.9692	62.9735	48.4226	48.3402	49.1423
YCR026C	11.738	12.7351	12.3846	12.6373	12.6455	11.7042	11.32	11.9273
YHR205W	30.8901	30.4513	29.268	28.1116	31.3499	23.9815	24.2795	24.757
YLR038C	486.344	532.43	488.56	537.468	432.624	501.469	478.224	515.526
YCR044C	24.7796	24.886	24.7189	25.6266	30.4067	25.3558	27.834	27.3581
YNL160W	284.145	259.071	259.488	245.041	117.453	210.829	208.816	208.137
YLR182W	13.6701	13.2723	13.8893	13.4737	14.4638	13.5792	13.3224	13.1079
YJL191W	320.509	264.432	280.582	233.06	196.028	262.718	247.91	202.832
YDR139C	465.307	508.224	494.955	505.698	544.889	518.752	498.88	569.458
YGL019W	80.4316	80.8976	79.3063	81.3455	91.2363	84.5312	81.9756	86.8911
YHR183W	212.778	232.896	205.112	212.564	275.162	196.354	210.234	209.295
YLR132C	9.67351	11.3062	10.8101	11.2507	14.191	9.22314	9.58674	9.22594
YLR064W	43.4494	43.3779	41.8762	43.4575	56.0833	43.6437	45.6682	49.3913
YER107W-A	36.633	38.8235	34.9725	35.2554	36.4857	31.8606	29.6146	29.6599
YER174C	45.5481	47.6605	47.7903	50.8736	48.8862	40.174	40.5579	42.1842
YDL043C	22.0728	22.5715	24.8662	24.566	25.1366	22.3091	21.4742	22.1
YFR031C	6.71124	6.38406	6.86746	6.14511	5.40417	6.36562	5.52248	5.31291
YGL231C	136.714	135.286	135.816	139.316	161.189	154.259	163.448	157.888
YOR195W	12.5378	12.9775	13.3818	13.2885	14.4865	13.9984	12.3701	12.7743
YML107C	12.7753	12.3202	11.6922	12.0361	12.4242	13.2278	11.551	11.6617
YDL093W	8.07488	7.25963	6.62178	7.25694	7.92904	7.82503	7.94642	7.59276
YNR035C	91.6935	101.635	93.0442	99.6657	112.429	94.0363	104.146	104.256
YGL027C	11.6536	11.5439	11.0693	11.1922	12.7803	11.5803	12.5277	11.3025
YNL303W	9.23382	10.9608	11.4346	6.91664	8.15363	9.98662	8.91565	6.97891
YBR208C	5.21502	5.01386	4.96789	4.79407	5.16695	6.89583	6.30471	5.84382
YBL020W	12.8779	13.8656	13.2115	13.7172	13.9446	13.03	13.3943	12.6855
YER067C-A	59.4362	48.6339	59.7808	57.3642	52.7945	112.433	90.789	85.5156
YER090C-A	0	0	0	0	0	0	0	0
YGR129W	17.4248	18.689	18.5327	20.8002	19.0778	21.7918	20.3572	22.5668
YKR060W	38.7817	36.7135	40.117	37.2465	42.8496	42.1481	42.8324	43.6134
YNR061C	44.1677	43.0374	41.1371	42.6852	50.1972	45.198	47.5797	48.0724
YJR141W	13.0264	12.0607	13.6959	12.2748	12.0554	12.2696	10.8485	11.0088
YBR148W	1.22034	1.35644	1.10704	0	1.51929	1.83507	1.87677	1.48891
YBR164C	136.347	144.617	145.383	149.947	177.96	157.644	164.859	175.634
YGR140W	8.15952	8.67331	8.38087	7.9332	8.2753	7.46643	7.33381	7.03286
YOR305W	41.5974	42.9604	43.8088	45.7962	46.0416	41.7579	44.4993	43.4277
YGL126W	39.0913	36.3747	36.2768	36.4072	35.7952	34.8112	35.6277	30.8947
YGR088W	12.9952	13.8382	14.9817	13.3782	5.06729	4.9349	5.33377	5.58931
YBR112C	31.2944	27.2703	31.0551	27.6952	27.9956	26.5824	28.6104	29.0455
YCR047C	47.9575	46.0704	49.7251	43.9281	52.9871	40.9801	42.6989	44.2107
YCR067C	11.2994	10.823	10.9238	11.1088	11.706	10.1203	11.2106	11.0695
YHR187W	22.8111	23.1567	23.2436	21.1594	25.1016	23.1616	24.0463	24.5257
YHR005C	50.5026	55.1424	52.3848	51.3212	62.6269	55.1287	56.1017	55.7985
YCL050C	172.175	191.512	190.968	199.799	240.305	194.559	208.07	215.019
YDR333C	16.3725	16.4333	16.4086	15.7798	18.2515	15.9077	16.7558	16.2331
YKL045W	21.1556	22.309	21.1451	21.6319	25.1096	20.1018	22.1732	22.4908
YIL122W	13.013	11.6615	12.5503	12.682	13.2998	13.9413	14.6609	14.5424
YNL176C	17.6805	16.0325	16.5034	16.5144	15.6638	13.317	14.899	13.9312
YBL019W	7.12524	6.94647	6.75024	6.86952	6.49484	6.69135	6.51478	6.10898
YKL043W	38.6945	36.9816	37.4904	36.6453	44.6617	65.0299	67.2435	65.3072
YPL110C	3.74066	3.69644	3.91285	3.73523	3.48364	3.56236	3.5288	3.30629
YDR527W	36.8202	34.856	37.3595	36.0981	39.8446	35.6319	34.3925	34.2448
YGL172W	33.9873	35.8164	36.1088	37.6742	43.601	36.3876	36.3203	38.1773
YER112W	111.821	110.986	122.3	121.072	136.173	116.529	109.951	118.272
YOR200W	25.381	24.7649	26.1862	24.4589	28.106	22.3033	22.9056	21.8632
YHR212C	3.91835	3.77903	4.16649	4.57226	3.28461	2.99557	3.25513	2.82425
YHR079C-A	1.25987	1.22627	1.8383	0	1.94127	16.7199	16.5716	15.0499
YPR114W	92.2439	93.0017	86.8412	90.277	103.608	92.6813	97.0132	95.0399
YKR065C	109.121	114.291	106.851	117.984	124.401	105.782	112.871	120.839
YJR054W	11.6238	12.09	11.1247	11.7894	11.8574	11.1616	11.326	11.8932
YPL050C	60.3295	55.5481	55.9528	57.4437	66.0029	56.1065	62.2392	56.3491
YGL139W	10.7492	10.1475	11.2745	9.91634	11.4879	10.1645	10.0486	10.3308
YHR010W	2719.38	2671.16	2652.67	2499.84	2345.25	2644.91	2576.49	2377.41
YBR088C	78.4953	85.6359	75.6855	76.1733	82.8619	67.3762	72.4898	67.941
YML067C	34.9508	35.5681	32.9199	31.3457	41.7327	34.4934	37.301	35.1928
YMR147W	11.1206	12.1368	12.9081	13.355	14.8183	13.9218	15.7998	14.2354
YDR020C	28.5177	27.9554	27.249	24.4469	25.6636	26.6378	24.3516	23.3184
YMR272W-B	1.24342	3.32836	5.55662	3.98177	3.62626	1.13481	3.19392	1.28246
YHL005C	1.3601	0	1.28501	0	1.51509	0	0	0
YPR158W	15.5825	19.8401	17.0875	21.7122	33.2042	22.5552	24.9874	30.4535
YIR036C	43.0816	50.0799	45.8455	47.2167	51.6395	38.1999	39.1332	44.9338
YDR030C	5.35546	5.39428	5.35515	5.05675	4.36273	5.09154	4.35843	4.49981
YPL274W	8.84248	8.12638	7.76524	7.99788	7.65118	10.7897	10.2709	10.7668
YLR437C-A	48.8863	52.4319	49.2791	47.3194	64.6719	72.3952	73.4405	76.6577
YDL067C	1873.31	2014.22	1848.21	1866.9	1856.71	2149.67	2173.6	2143.9
YMR049C	31.0561	29.1622	29.4132	28.5532	34.1872	26.4338	26.6447	26.9512
YGL258W	3.26844	2.37897	2.54657	2.27385	2.51626	1.84802	2.09848	1.32338
YBR055C	9.37159	10.3082	10.226	10.055	10.7054	10.1876	9.71833	9.56342
YJL094C	5.76058	5.71228	5.04196	5.87133	5.84052	4.97827	5.54897	5.39238
YGR225W	0	0	0	0	0	0	0	0
YMR038C	168.317	183.46	169.249	185.308	243.19	193.929	210.767	213.071
YFR033C	473.287	466.497	522.185	490.417	452.742	545.742	504.046	485.413
YMR247W-A	23.5244	24.4449	37.8217	22.1308	13.2918	16.1563	23.5888	12.3848
YMR062C	23.4001	24.7949	22.4098	22.9825	30.1819	23.0755	23.9038	23.7872
YJL023C	6.51404	7.01588	6.86131	6.77136	6.93215	6.38364	6.74554	5.5951
YCL014W	5.16155	5.04489	5.0391	4.95561	4.51938	4.46268	4.60932	4.39901
YJL166W	939.54	954.779	1066.18	1148.04	956.65	1150.05	1052.89	1129.23
YJL214W	2.59272	2.36465	2.47214	2.65984	2.41833	1.45676	1.1856	1.39549
YER097W	1.45956	1.18848	1.81973	0	0	1.38203	0	1.26654
YNL274C	19.722	24.0201	20.8113	21.9453	23.0212	29.7109	32.5053	36.521
YJL126W	13.006	13.7693	13.6123	13.667	15.5714	12.3971	12.3895	12.3444
YOR205C	14.5739	15.4886	15.3325	15.1439	14.7654	15.496	13.9718	14.3788
YNL164C	12.4629	13.5955	13.0351	12.3288	14.394	12.4294	12.5793	12.3037
YER165C-A	14.2163	12.3465	12.6668	14.1145	11.9084	12.4582	11.1043	10.9691
YJR097W	20.4198	19.3008	19.6507	21.7926	27.2905	18.7966	20.7346	21.5447
YOR192C-C	95.5108	87.1628	81.4256	85.9107	72.7951	109.763	105.917	117.034
YPR097W	9.42579	9.42604	9.67588	9.35843	9.84988	9.04796	8.94957	8.88995
YMR323W	0	0	0	0	0	0	0	0
YJR070C	164.733	161.645	160.931	160.039	197.724	117.901	118.546	113.701
YDL179W	25.2964	26.533	26.2146	24.6292	27.851	28.5086	26.8589	24.9815
YBR266C	0	0	0	0	0	0	0	0
YKR075C	37.558	32.4077	34.4136	36.2637	38.7385	32.6283	33.8319	32.4093
YDL102W	8.11582	8.32825	8.5578	8.06562	8.57771	7.95009	7.5964	7.88517
YCL058C	46.9965	46.6106	51.3439	42.3931	43.7233	45.4894	41.9614	41.7846
YJL215C	7.29187	6.75631	7.33421	7.41336	6.50435	4.30662	3.05359	2.48922
YMR234W	18.3866	17.0108	17.7301	17.5689	17.8851	20.5418	18.8446	16.6352
YLR454W	5.0733	5.46531	5.01318	5.36238	5.19625	4.37544	4.72825	5.1016
YLR212C	20.8748	19.9757	18.9563	19.7002	23.5786	18.4861	19.908	18.7537
YPL011C	20.3996	20.6314	20.4848	20.9048	23.2845	20.5986	20.0818	18.4416
YNL013C	1.27349	1.23593	2.47235	2.04285	1.30537	0	0	0
YGL014C-A	0	0	0	0	0	0	0	0
YJL105W	2.31287	2.33043	2.23886	2.46625	2.76634	2.35136	2.42492	2.53314
YDR182W	21.6614	22.2876	20.9451	21.2208	24.7579	20.1865	23.1054	21.4768
YBL071W-A	109.589	93.3516	101.713	96.9835	96.9674	107.233	97.507	99.1034
YBR269C	131.04	136.489	132.344	140.577	132.081	113.283	115.876	126.555
YLR451W	10.1439	9.49369	10.0228	9.59098	9.12061	9.31299	8.38972	7.70301
YHR089C	270.087	274.53	252.36	261.269	287.273	282.532	281.85	283.513
YGR135W	185.321	200.896	191.003	207.044	245.657	197.485	207.243	217.642
YLR162W	27.0026	46.1817	35.525	43.3806	41.1094	40.03	57.769	53.88
YER041W	6.76545	6.93558	7.189	6.89503	6.68847	7.28739	6.88344	6.59758
YDR006C	17.3322	15.9741	16.0727	15.311	14.6774	14.0331	14.7405	13.7482
YCL017C	37.5992	40.6503	37.6109	40.2767	48.5617	36.7961	40.1912	43.1437
YLR076C	643.785	605.552	681.779	590.913	608.331	606.275	593.881	586.591
YGR070W	3.96974	3.91727	3.91979	4.59857	3.66723	3.81741	3.92703	3.91854
YDR010C	3.10193	2.33279	3.12716	2.87719	1.99376	2.93823	1.91164	2.82242
YOR136W	159.739	166.481	159.659	158.561	166.158	182.254	183.956	195.262
YER074W-A	490.696	512.66	533.401	543.693	588.657	535.353	549.867	599.817
YPR081C	10.1787	11.0502	10.363	10.7969	10.8103	9.82806	10.0056	10.0307
YDR498C	23.671	24.4104	23.3517	25.0891	25.0823	23.5223	23.8264	25.3554
YJR104C	1417.14	1494.16	1394.77	1280.54	1267.97	1185.13	1229.08	1274.08
YLR147C	98.2082	102.041	105.662	98.9895	115.488	105.491	98.5663	105.878
YDL224C	24.1766	22.862	22.7024	24.3081	23.2225	19.9118	22.141	20.7953
YHR162W	797.118	812.942	771.536	816.829	895.42	790.47	787.316	802.419
YFR054C	0	0	0	1.06408	0	0	0	0
YGR229C	80.0633	81.636	82.5927	81.3253	88.1352	77.0775	78.5749	79.8415
YLR005W	21.3348	21.3564	20.3501	21.0675	23.8371	20.7719	20.3483	19.9585
YDR082W	8.50523	8.23551	8.49771	8.2738	8.00655	8.23209	7.74686	7.88553
YJL124C	265.045	295.585	298.877	312.394	340.824	299.011	292.285	299.335
YBL107W-A	37.3985	36.8973	48.5094	45.7333	32.0484	41.192	38.2953	42.1103
YDR216W	6.99634	6.69183	6.74109	6.84597	4.25627	5.83756	5.06346	6.19856
YCR068W	6.84023	6.32153	5.9191	6.52825	5.64461	7.50443	7.41337	7.74552
YGR161W-C	43.784	46.1257	48.3059	60.2359	58.9007	28.4072	29.0008	30.0003
YNL083W	9.84087	10.9509	10.0352	11.0551	12.5925	12.5114	12.1924	13.3091
YKL106W	19.8457	21.1885	21.2138	18.6432	23.3309	24.5337	23.3987	22.7026
YLR115W	9.58093	10.2229	9.90977	10.1518	11.1862	10.9106	9.63234	10.5659
YDR325W	6.24405	6.48546	6.3213	6.27315	6.51196	6.10184	5.585	5.70915
YHL050C	4.00371	6.58549	2.45846	7.12199	4.67109	4.83499	3.15442	2.49534
YGL249W	1.81444	1.90692	1.65163	1.81117	1.51047	1.59939	1.14937	1.3381
YJL053W	26.2885	29.5519	27.2953	30.5209	32.8206	29.8866	29.6029	29.9675
YDR372C	78.568	81.3918	81.5778	84.1326	84.6315	74.3672	75.2235	72.038
YGR173W	36.0566	36.7908	36.7827	36.0985	43.4029	43.2398	45.4497	44.7849
YAR042W	17.232	16.9828	17.4904	17.5278	17.7005	14.3234	14.8555	16.2387
YPL273W	168.386	183.245	179.199	187.302	219.952	170.341	173.128	178.031
YDL222C	7.03936	6.76058	7.00262	7.73211	2.2155	2.50005	3.05583	2.94477
YIL087C	60.7264	64.6706	61.9745	59.3639	57.8501	63.2239	63.1917	64.0526
YNR027W	27.7483	28.8327	27.1694	27.7493	31.9496	28.3516	26.6386	27.1977
YCR095C	15.9039	17.3673	17.1258	17.8271	19.6114	16.3443	15.7702	16.5319
YER162C	4.53796	4.56746	4.86708	4.64483	4.64449	5.01909	4.24009	4.364
YER090W	60.5243	64.5846	58.0552	62.3557	79.2256	56.9877	61.1565	63.6963
YGL215W	43.3484	39.5813	41.14	41.3797	44.038	37.1767	41.7037	42.6611
YBR016W	242.722	237.437	281.176	277.815	301.809	307.318	284.509	315.472
YFL025C	4.42885	4.63949	4.49214	4.53837	4.73677	4.37023	4.83816	4.54314
YLR208W	175.621	186.519	180.314	185.853	210.271	180.509	187.843	192.309
YHR030C	29.5099	27.9738	28.5358	27.3501	31.6287	26.6174	26.1307	25.3949
YDR395W	28.1408	28.3577	28.1976	27.8509	29.2782	25.639	26.0287	26.2446
YMR282C	10.3053	11.1668	10.4789	10.6811	11.592	9.74492	9.65777	9.45949
YMR056C	9.44521	9.77028	9.19621	7.6074	7.44408	7.35551	6.38564	6.98331
YPL203W	30.368	32.1168	28.8684	31.7182	30.8674	25.71	24.2184	25.6319
YIL041W	174.746	190.22	176.62	183.111	208.08	174.177	185.236	198.392
YDL210W	1.21651	1.45854	1.12014	1.09724	1.10355	1.02652	1.0194	1.03742
YLR149C	3.13771	3.35225	3.28838	3.92176	3.00706	3.53008	3.59637	4.19324
YGL005C	22.9769	25.7543	26.0286	26.2629	28.3192	25.6966	27.1554	27.777
YDR132C	7.60535	7.27512	7.26497	7.81124	8.76282	8.01499	8.23999	7.67719
YOR161W-B	0	0	0	0	0	0	0	0
YBR015C	36.487	34.0509	33.4474	34.5775	38.3396	33.9983	39.2029	36.9853
YER156C	96.6512	101.827	95.9506	95.0296	109.745	95.0494	97.2825	98.1242
YLL039C	52.2066	57.6024	54.1111	56.8829	61.4181	66.6346	71.2223	80.2766
YPL214C	14.5563	15.1138	13.8633	15.3764	15.5601	14.8866	14.1122	15.2851
YGL007W	4.31281	4.33319	4.67833	3.97073	4.08428	4.76219	3.72109	2.94824
YFR025C	36.0308	38.4056	37.3812	35.8965	43.3718	40.5405	40.4005	42.8272
YGL245W	156.954	160.483	149.572	161.299	196.885	152.688	164.34	166.074
YDR464W	10.8164	10.5951	11.3159	11.0643	9.9893	9.08241	8.81071	9.36949
YBR037C	29.942	34.9413	31.8035	33.9914	32.8844	28.8557	29.961	31.266
YDR154C	1529.83	1694.56	1533.23	1690.57	1658.89	1459.87	1521.33	1649.08
YAL068C	0	0	0	0	0	0	0	0
YPR059C	10.9889	8.11192	10.0625	11.059	13.1632	9.3392	8.68594	10.07
YFL063W	0	0	0	0	0	0	0	0
YGL141W	7.31773	7.37506	7.33879	7.65578	8.58172	7.20942	7.16185	7.62174
YEL014C	2.30063	2.64859	2.26801	2.90738	3.79802	3.26262	1.48728	3.26198
YGL251C	2.24466	2.0925	2.11233	2.39934	2.022	1.55945	1.48325	1.29447
YPR091C	12.9748	12.7167	12.8442	12.9438	13.6842	13.8301	13.6668	13.847
YFL013W-A	10.2717	10.6324	11.3337	10.3159	10.2268	10.8595	10.0183	10.7898
YJL116C	21.7331	19.6551	20.1571	18.185	8.83211	13.246	12.8758	12.3606
YDR341C	92.7314	96.2703	90.9922	91.1367	115.568	92.0213	92.4633	94.8919
YKL012W	15.0291	14.9011	15.4541	15.3968	16.4991	15.1923	15.1021	15.3362
YBL078C	49.0555	51.0001	57.6019	62.8523	56.698	61.5142	59.6133	67.2442
YAR035C-A	3.58396	2.08493	1.9588	1.80191	1.22273	1.80374	3.85776	2.3442
YGR234W	163.815	166.379	146.721	156.855	221.693	260.606	281.154	268.095
YPR126C	60.7052	50.0587	60.7954	52.6266	57.8175	56.8491	56.191	57.8599
YPL117C	151.669	159.124	158.823	156.776	175.92	140.451	142.731	140.409
YLR434C	2.22263	1.92626	3.10678	1.8811	2.20101	2.09756	1.8438	1.42859
YPL120W	7.96908	9.48981	9.8409	10.0887	11.0241	6.07196	7.11177	6.6411
YMR153W	29.3811	31.1642	30.7735	31.407	34.8859	30.9439	31.1359	31.2226
YGR267C	123.434	126.734	127.823	130.429	149.115	125.351	127.276	125.886
YJR003C	14.2821	13.5502	13.7331	13.2953	16.1903	14.7009	14.2968	14.3121
YHR193C	959.077	943.576	1033.95	1013.56	1188.94	986.416	1082.62	1081.13
YEL030C-A	2.9148	2.49305	4.37383	2.78862	3.8096	2.91852	3.32328	4.00904
YPL048W	276.986	298.717	280.997	286.282	309.588	284.212	295.034	309.246
YNL132W	23.462	22.0302	22.5807	21.9893	23.366	21.0374	20.2724	20.28
YOL080C	20.3351	19.2991	20.9349	19.3622	24.7611	20.8398	20.6928	21.9329
YDR444W	10.8396	11.0516	10.982	11.0784	10.5156	11.2656	10.1589	9.54359
YPL083C	13.1976	13.5391	13.3751	12.9207	13.7393	14.6185	14.1758	13.4864
YGR271C-A	38.5306	38.0203	40.9949	35.3891	44.1208	40.7564	36.86	36.7018
YDR419W	8.57463	8.61754	8.67472	8.15754	7.40012	8.38667	7.83091	7.52703
YIR009W	51.5818	51.4177	48.6821	50.5771	49.6725	56.1393	54.62	49.9505
YOR254C	35.6505	35.5311	35.0214	36.7638	43.8269	35.7901	38.8885	36.2353
YCL066W	0	0	0	0	0	0	0	0
YKR020W	39.3876	40.0375	44.6689	42.1285	45.1281	43.402	36.3848	42.7062
YIL033C	80.7669	89.5226	85.8604	88.5675	93.2648	75.7332	78.9963	82.8993
YJL115W	45.0632	43.667	48.3698	45.6033	49.6282	48.2992	48.3405	46.3991
YPR041W	162.427	167.344	158.542	163.509	198.229	174.619	178.266	182.042
YOR218C	22.4433	21.7556	23.326	24.251	22.8297	18.8693	21.6558	19.6295
YIR010W	16.4091	16.6783	16.8964	16.1291	16.5479	14.894	16.2397	14.68
YOR147W	11.2485	12.1482	10.6088	12.1356	13.3815	11.7818	12.0409	12.1437
YGL101W	68.4573	67.7935	70.0432	62.0569	65.3734	66.0894	66.325	59.3501
YNL172W	3.14567	3.23941	3.17468	3.04866	3.09115	2.96429	3.07479	2.96295
YMR031W-A	0	0	0	0	0	0	0	0
YGL053W	25.7963	26.8174	22.3439	24.789	27.8653	27.7488	28.8733	27.1919
YKL042W	21.1637	21.2593	21.3388	21.8307	24.4673	17.84	19.9859	20.8911
YGR253C	161.102	175.497	169.586	182.146	208.801	178.662	182.83	186.11
YHR159W	6.08178	6.10408	6.36953	6.88386	6.86794	6.10606	6.17173	6.54248
YJL169W	15.0748	10.0032	12.5779	11.4918	11.0281	12.5803	12.0028	12.7622
YHR199C	47.0087	47.3089	44.2152	43.2798	48.0761	44.5669	46.5084	44.282
YBR185C	28.3019	30.1499	27.3153	27.4657	34.1755	27.481	28.7604	28.2233
YKL037W	7.09129	7.57906	6.0437	5.52909	9.24335	5.69648	5.50964	7.01512
YDR423C	21.6453	21.8115	23.6828	23.5372	24.9692	23.1211	22.9021	23.8516
YJL035C	10.5025	10.918	10.3153	8.71026	9.65415	9.75787	8.73713	8.49822
YOL093W	36.9133	38.3271	38.6401	38.5325	44.5444	40.7371	40.5216	41.0977
YDR017C	13.2374	12.0026	12.7283	11.9301	10.8632	11.2798	10.0793	9.97503
YIL036W	22.1321	21.7297	23.1588	23.3902	23.1078	21.1202	20.8156	19.9229
YJR089W	6.52418	6.42595	6.42439	6.09907	5.87867	5.87135	6.2332	5.55096
YPL124W	11.406	11.9104	11.3849	11.6394	12.2976	11.8902	11.2041	12.1154
YLR354C	463.233	470.89	446.291	439.413	478.789	456.439	454.163	459.785
YJL042W	11.2464	11.2417	11.7834	11.2575	9.6975	10.4459	10.4488	10.2737
YEL053W-A	745.974	667.232	671.382	647.736	587.461	767.607	711.587	658.636
YDR005C	28.1702	29.9718	28.1784	30.9042	31.4424	28.0989	28.4952	28.8564
YJR107W	10.5511	10.4986	11.1418	9.96953	9.77462	10.6056	9.70813	9.00685
YLR422W	4.06258	3.98439	4.02098	3.84872	3.75297	3.61792	3.38991	3.57266
YDR098C	90.8352	95.1471	95.9685	99.4905	111.272	93.5221	101.049	105.657
YKR030W	39.2066	38.4468	38.7752	41.0323	42.095	41.3825	39.7212	37.7669
YPL232W	91.2695	89.3533	91.9776	89.6444	95.3927	90.4586	91.7489	92.9901
YMR001C-A	17.3975	17.7998	18.784	22.8878	22.705	18.8204	19.9789	17.4952
YCR099C	5.53193	6.42054	4.78788	6.92198	5.68182	2.87929	3.31101	3.19898
YAL019W-A	1.46654	1.55989	1.98333	1.55451	1.53535	1.66065	1.18756	0
YGL135W	1395.18	1306.27	1340.94	1247.25	1175.43	1319	1306.13	1176.63
YDR280W	38.7359	37.8859	38.008	39.9568	44.788	36.1411	37.5895	37.7738
YJL154C	18.6135	19.3918	19.0822	19.3162	20.128	16.536	16.9836	16.6985
YIL113W	8.18755	8.13244	6.79017	7.39112	5.91037	7.58786	7.74748	8.5625
YLR387C	31.8095	32.1437	31.0571	31.3899	36.9265	29.3281	30.3818	29.1786
YDR328C	179.655	178.937	170.731	178.576	211.585	174.36	183.466	193.338
YJL155C	9.86906	10.6728	9.95771	9.48527	9.89742	9.38152	8.77973	9.06531
YOR109W	15.657	14.9034	14.6659	14.7356	12.9533	13.4899	13.0192	12.0161
YLR386W	10.5824	10.3679	9.98442	10.2851	10.5353	9.62014	9.14562	9.65627
YDR185C	16.2901	14.6827	15.1064	15.0777	12.3114	14.5787	14.0401	10.5957
YHR129C	12.2482	12.3556	12.0407	12.1016	13.0758	11.173	10.7667	11.0498
YNR010W	21.8101	23.1178	23.0108	24.1885	27.0996	23.851	22.0406	24.2626
YIR007W	6.69371	6.69049	6.29162	6.78821	6.62507	6.72884	7.09654	6.98684
YPR027C	9.65894	9.57163	11.436	11.77	11.8807	10.4206	10.2565	9.36389
YJL004C	47.3276	47.9846	47.1636	49.0264	51.0887	47.8675	46.2856	44.9352
YDL042C	11.3452	11.4801	11.9918	10.2326	12.4533	10.7728	10.9966	9.94785
YGL069C	106.473	113.74	110.12	113.753	128.114	99.1123	115.574	119.34
YPL095C	14.5956	15.2363	15.6788	13.7525	12.9458	15.4826	13.1908	12.4978
YIR035C	63.4492	69.9497	64.3304	60.6909	65.2343	51.1381	49.0545	48.2281
YKL159C	26.3968	28.2023	28.2035	28.5398	31.9771	26.2524	26.0436	28.9103
YPR127W	43.412	42.0163	44.2101	42.1295	35.3097	35.7645	36.1359	37.7299
YFR037C	53.3579	55.3181	52.0902	53.5946	64.7027	54.3017	54.9772	58.0826
YKL161C	6.45623	5.90273	6.609	5.94104	5.16256	6.31788	5.13322	5.40045
YLR061W	1884.08	1763.23	1807.38	1550.24	1642.83	1781.19	1795.25	1710.7
YNL330C	34.546	34.5391	34.5616	36.015	41.5784	33.591	35.4178	37.3589
YER079C-A	29.5851	28.5261	30.0345	27.0985	37.0191	29.6265	32.7215	37.212
YHL011C	126.757	136.529	120.309	128.987	162.951	125.502	134.206	152.853
YIL114C	18.9297	21.8588	18.2632	19.6742	30.3595	16.938	18.6251	18.5899
YPL243W	42.6066	42.6853	42.6409	41.6633	48.146	42.0406	41.627	40.8244
YDR541C	16.0662	18.1784	18.5215	13.9135	19.3437	15.9011	15.8978	16.0502
YBR277C	6.0506	10.1775	6.4837	7.13264	7.95128	6.42954	8.18738	8.57352
YOR108C-A	0	0	0	0	0	0	0	0
YNL016W	146.508	145.903	143.939	144.456	161.899	140.64	138.317	147.379
YEL009C	605.55	588.206	584.4	581.484	599.167	562.814	574.658	571.001
YNL316C	18.4868	18.7552	18.1879	17.7157	20.6736	18.111	18.5007	18.4835
YNR003C	38.5286	39.8134	37.6616	38.9898	50.2617	36.5492	37.347	36.9896
YLR380W	68.6635	68.2106	65.9246	67.1388	77.6401	69.5536	73.6128	75.9087
YMR013C-A	0	0	0	0	0	0	0	0
YNL113W	157.402	156.693	155.846	157.648	178.264	160.898	157.859	158.565
YKL079W	11.0817	11.4849	11.1944	11.489	12.7619	11.1327	11.025	10.3815
YDR056C	99.3571	109.081	99.3009	101.537	117.491	108.815	109.203	117.211
YDL240W	6.59437	6.2239	6.48404	5.9173	6.21937	5.59597	5.57863	5.90286
YJR102C	20.2744	19.4315	19.197	21.9227	21.3297	18.5522	18.6526	17.9419
YKR095W-A	134.397	131.21	126.6	127.222	141.426	134.397	118.271	124.703
YPR138C	24.6331	22.8961	23.7703	23.1909	21.5411	20.6838	19.344	17.9683
YOR225W	11.7981	11.2906	10.0085	9.16255	11.4775	11.5169	10.8899	9.45605
YGL108C	37.5692	40.2907	43.2	48.009	49.2284	48.9307	45.8679	47.226
YGL221C	91.1235	93.3306	97.5542	102.67	111.94	111.781	109.992	118.148
YDR183C-A	22.8475	22.8939	24.4231	21.6334	23.1169	26.7676	23.5771	19.9396
YCR050C	33.6152	33.5195	33.357	33.1277	33.5968	31.5208	35.164	30.4532
YOR028C	7.97034	7.84154	8.77957	8.30458	7.17434	11.2131	10.9417	9.17881
YOR169C	14.9361	13.0007	13.5787	12.3954	11.7846	12.5354	11.7104	11.9799
YBR186W	2.85694	2.89237	2.77341	2.38607	2.45348	2.69271	2.23135	2.37992
YOR080W	6.11909	6.3567	6.28181	6.28722	6.55863	6.70259	6.36069	6.81256
YBL006C	98.2196	105.611	105.023	106.128	109.967	101.944	100.541	106.695
YOR235W	1.3471	0	0	1.03834	0	1.65559	1.77609	1.52644
YER036C	123.235	122.718	120.117	117.871	130.27	115.542	114.806	116.864
YLR442C	5.52639	5.34162	5.13431	5.1314	5.07266	5.23128	5.23766	5.26537
YLR024C	3.52536	3.47646	3.52227	3.5491	3.36018	3.5598	3.32261	3.44728
YLR326W	20.8534	21.4293	22.2784	20.2991	20.6804	18.5993	17.9597	17.2195
YIL013C	2.43372	2.09682	2.58311	2.14191	1.99066	2.19958	1.88585	1.95717
YLR122C	3.02831	1.52036	3.01992	3.56007	4.07234	3.42007	3.80579	3.74975
YJR015W	33.9307	33.4135	29.7033	34.061	39.3438	39.6659	43.6492	43.3871
YLR396C	7.59016	7.69909	7.86047	7.27714	7.29878	7.13669	7.55352	7.627
YER084W-A	0	0	0	0	0	0	0	0
YHL046W-A	9.09964	9.09044	7.38427	9.39417	6.90256	5.86448	6.13176	5.19575
YLR042C	46.064	38.2449	40.2782	38.9571	33.6698	53.8486	56.1541	46.9444
YEL056W	28.0494	30.0374	29.6526	28.6935	31.7252	24.8583	25.6027	24.9272
YER140W	7.38045	7.87235	7.63507	7.57193	7.50302	7.63098	7.35522	8.35733
YNL298W	10.6513	10.2992	10.2849	10.8564	10.9424	9.39475	10.6965	10.3857
YPR055W	6.62139	7.0497	6.73642	6.879	6.91546	6.66892	6.82205	6.67017
YOL126C	164.746	169.609	162.894	165.465	169.882	204.45	199.508	187.776
YPL206C	44.1365	48.777	44.1761	48.5152	56.1141	34.6499	38.5628	39.8703
YIR006C	20.2933	20.0567	20.9476	20.2788	18.8619	18.4594	19.1482	19.9135
YGL205W	1.31026	1.15191	1.25363	1.15326	0	1.05063	0	0
YGR290W	2.21503	1.85641	1.70274	2.68688	2.39732	1.96996	1.59641	2.03697
YGR022C	5.16876	5.17536	3.70669	4.6169	5.02417	4.86342	5.39462	5.57446
YOL121C	1036.87	1014.36	972.648	917.202	956.086	1002.9	995.877	934.936
YLR183C	26.4308	27.4624	26.8094	27.6967	29.871	24.3652	25.2654	25.081
YIL145C	66.6511	69.3353	67.8115	66.8038	70.9403	62.5838	63.5613	67.0776
YNL139C	7.29085	7.11727	7.47543	7.23384	6.72102	6.59303	6.44872	6.55388
YBR274W	10.6886	10.9597	10.6399	10.8397	11.9426	9.95383	9.62308	10.2433
YJL071W	6.21619	7.33556	6.29977	6.62275	7.96385	6.17157	6.64197	6.40785
YLL028W	13.7815	14.4374	13.9241	15.2591	14.1264	12.9286	13.4759	13.9466
YER091C-A	0	0	1.10503	1.96859	0	0	0	0
YGR189C	87.2529	83.0073	78.8487	83.738	81.5601	76.5833	93.4811	87.6329
YHR152W	85.0559	89.4322	93.4879	96.8954	105.226	100.141	100.908	112.876
YPL283C	3.65321	2.55325	1.50276	1.4182	1.49783	0	0	0
YJR118C	68.5256	72.3755	69.387	68.7195	80.2936	73.5426	74.8096	71.9865
YLR130C	41.4275	41.7533	40.3576	40.6805	39.8098	39.9462	39.5455	35.0422
YDR184C	27.0813	28.3918	27.9853	27.7323	34.2822	26.0526	26.2954	25.9985
YPL268W	7.65213	7.86719	7.95544	7.60351	8.18159	8.22923	8.28265	8.28391
YGR185C	211.974	229.392	214.48	214.061	259.549	226.765	233.116	236.519
YOR016C	57.713	57.929	58.5874	59.9644	62.0689	57.4481	60.5637	59.9621
YHL019W-A	10.0958	11.009	11.7	10.0644	10.2751	9.92112	10.9551	10.4394
YHR039C	35.9507	34.0281	33.5522	35.241	40.427	36.9476	39.8368	36.8507
YPL021W	0	0	0	0	0	0	0	0
YNL047C	10.4245	10.2273	10.4435	9.57978	10.3928	9.27585	8.59036	9.66642
YDR122W	13.3477	13.6926	13.5882	14.0306	13.1161	11.8976	12.0474	13.3385
YGR169C-A	188.148	181.257	237.449	201.867	185.83	227.426	193.505	193.991
YBR235W	5.95377	5.73463	5.93559	5.43968	5.27555	5.45266	5.0854	4.83851
YHR114W	19.4084	19.1195	18.3607	19.7859	21.7643	19.6689	20.4411	20.8286
YLR306W	30.3755	28.6824	27.304	28.4424	31.9123	26.9569	27.5547	27.5891
YDR054C	65.2055	70.5262	67.9745	72.8197	82.2109	70.3947	69.0288	76.1774
YOR138C	12.2569	11.9125	11.9928	12.2229	12.0549	11.53	11.7862	10.7028
YLR351C	85.2987	90.9694	83.584	90.0683	97.0478	85.2922	85.2328	87.4575
YKR077W	21.0909	20.0466	20.1332	22.1016	20.8841	17.3173	20.6056	20.1008
YMR032W	10.1811	10.7215	10.2849	9.75979	10.0348	10.3794	10.4655	10.0557
YMR228W	12.4869	14.5665	12.825	13.1158	14.5304	14.4727	14.5472	15.0014
YLR242C	12.3922	12.5206	12.395	11.555	13.7172	12.1796	11.5227	11.6004
YJR123W	2817.15	2798.42	2654.01	2649.82	2659.64	2735.67	2759.39	2662.3
YOL068C	27.8258	28.9921	29.2483	28.6062	30.3081	28.7167	27.6149	26.6611
YNL282W	23.7998	23.4924	24.0669	23.2036	23.8928	23.8025	20.9619	21.2028
YMR146C	231.724	241.543	237.311	238.74	279.667	243.644	244.293	245.428
YCR084C	68.1197	60.4676	63.8601	61.5397	61.5779	55.0651	57.0992	55.9417
YLR428C	15.9914	18.2291	15.1689	10.7931	18.4208	13.0911	16.7875	15.6043
YNL096C	887.302	841.022	887.22	828.475	797.3	879.877	829.528	750.223
YMR251W-A	9501.1	9529.29	9017.13	8889.76	6146.7	10134.1	9415.62	10873
YBR046C	28.6182	32.7453	30.587	32.8549	35.6067	38.9537	41.3735	41.5402
YER059W	16.6072	17.0023	17.5306	16.9861	17.9708	16.0273	14.9878	15.2454
YIR017W-A	1.47708	1.99535	1.79304	2.27176	2.48344	1.48565	1.2374	1.11186
YLR265C	25.1373	27.2675	27.559	26.8647	24.9603	26.4057	24.3916	23.0118
YJL046W	17.9931	19.7433	20.0038	19.3681	20.1789	20.4679	20.1473	20.285
YEL061C	9.61706	9.29846	10.2764	9.49847	9.23014	8.90109	9.00805	8.42348
YOR165W	19.8165	21.1383	20.0382	20.8379	21.7318	20.2361	19.8317	20.2975
YIL148W	3204.54	3094.29	3230.7	2936.83	3070.37	3342.4	3139.51	2972.02
YOR011W-A	1.75049	4.52549	3.26294	3.62033	3.80007	2.75021	4.05856	4.84933
YAL041W	14.6335	13.7147	14.388	14.4194	15.3855	12.5136	12.7806	12.502
YDR424C	219.096	223.624	245.283	245.892	252.653	229.106	236.34	230.902
YDR194C	36.7164	35.207	35.4053	35.7684	39.3565	40.0265	40.2968	38.2824
YGR239C	19.9378	19.8168	20.2227	18.4456	19.0045	16.6222	17.5009	16.3384
YBR108W	8.43236	8.55758	9.03812	9.0751	9.75036	8.76161	8.77751	9.04678
YAL044W-A	176.199	193.133	184.434	223.517	205.838	214.901	215.254	218.558
YOL023W	5.77349	5.69722	5.65074	6.38763	6.22364	6.28474	5.79451	5.58232
YBR076C-A	34.3266	25.7126	29.3956	30.8131	27.7904	28.5594	27.123	22.8093
YPL046C	73.1935	81.1055	69.1564	81.5267	87.0817	78.2836	78.936	85.5613
YDR141C	7.52025	7.43692	7.3177	7.41423	6.72742	6.82529	6.87516	7.13044
YDR288W	21.5432	23.0985	23.709	21.8995	20.9488	21.9551	20.2084	19.0047
YBR194W	30.1258	34.7387	35.4814	37.567	33.9278	40.0272	37.4378	35.9974
YGR201C	20.316	20.4998	20.9465	20.288	19.0521	19.3101	18.4803	17.7691
YCR090C	81.3395	83.8958	82.5635	80.0873	90.3613	86.3028	83.5983	81.3838
YLR461W	0	0	0	0	0	1.22104	0	1.33047
YER190C-B	0	0	0	0	0	0	0	0
YOL108C	32.1657	33.4611	34.4721	32.8265	39.1281	37.403	35.2679	31.2428
YJR148W	116.741	126.799	117.999	123.789	146.48	117.196	128.815	128.657
YJL123C	46.0845	46.8961	48.5581	48.0011	55.526	47.8005	48.9151	47.0104
YHR218W	2.61406	2.92483	2.05905	2.65711	2.57044	1.59098	2.7523	1.77565
YMR247C	6.78949	7.05929	7.03025	6.80519	6.77914	6.63445	6.47173	6.69491
YOL086C	3985.6	4132.34	3749.18	3684.82	4172.6	3872.67	4013.46	4010.04
YNL287W	47.2955	49.0916	47.1565	49.5401	51.0086	44.4153	44.419	47.5602
YLL064C	4.88238	4.70101	4.00585	4.80163	3.47282	2.18651	3.02315	2.78961
YCR013C	1504.9	1394.46	1376.18	1421.01	1630.95	1218.05	1297.78	1368.14
YMR152W	47.9346	50.3378	50.2586	51.9425	52.8471	49.892	51.2609	51.927
YEL051W	192.863	215.396	203.243	205.622	235.263	218.596	216.881	218.639
YNL095C	9.26681	8.39212	8.52342	7.85878	7.28046	7.75601	7.04881	6.8663
YHR021W-A	2.57326	2.62315	2.56707	2.39744	1.6623	2.05113	2.18904	2.43609
YOL028C	25.876	26.0148	27.4249	24.9774	23.0527	23.3413	23.2212	20.9728
YMR267W	35.9609	39.8827	36.7375	38.7883	41.7881	37.098	35.0912	36.6992
YJL065C	79.9811	80.1781	80.327	77.7124	75.2155	79.6246	80.2898	80.0272
YLR154C	126.463	125.737	130.447	122.338	150.353	140.357	133.928	141.685
YFL001W	17.9265	17.7921	17.4752	16.724	18.7544	16.4629	17.3233	16.2176
YMR230W	3000.56	2887.98	3028.36	2985.94	2831.85	3130.71	2909.4	2889.43
YCL073C	0	0	0	0	0	0	0	0
YIL054W	0	0	0	0	1.16431	1.12255	1.24294	0
YGR056W	9.5985	9.08799	9.17306	8.75751	8.4455	8.1943	8.48749	7.68008
YLR154W-A	1078.66	1017.31	1288.89	2897.35	1398.23	1128.27	1177.78	1564.37
YDR051C	34.0875	36.8792	37.2546	38.7789	41.2869	39.384	37.9368	38.7582
YNR060W	2.26732	2.13881	2.15918	1.86073	1.90196	1.49386	1.31003	1.43953
YDR353W	310.862	316.592	287.161	300.663	347.878	277.357	302.666	305.633
YKL089W	7.14194	6.82296	7.13422	7.30031	7.40142	6.77197	7.3462	7.12027
YBR018C	1.29702	1.40068	1.60259	1.67637	1.684	0	1.10766	0
YKL044W	15.6228	10.7175	13.159	11.843	14.8499	18.4492	21.7853	18.1977
YEL063C	20.3699	19.2417	18.8833	18.3125	19.018	18.0218	19.0815	17.0326
YHR053C	1586.41	1699.98	1652.01	1476.8	2326.97	1654.99	1846.63	1981.32
YPR010C	43.0356	39.529	40.2027	37.2793	36.7856	34.6447	32.9673	32.4631
YLR199C	40.6285	41.77	40.1945	42.0479	47.9056	41.1651	39.8071	41.3653
YDR021W	13.1526	13.8144	14.5938	14.0499	17.3374	15.2759	15.8932	15.8307
YER119C-A	3.41295	4.66137	4.83693	4.11347	2.34831	4.31721	3.04626	4.30243
YGL041C-B	1.40516	2.8177	2.15167	1.29511	0	1.38375	1.83891	0
YBR292C	7.29461	6.33306	6.25617	4.28555	6.09201	6.62643	4.73557	4.65639
YPR079W	10.7192	12.0229	11.9454	11.9317	13.5765	12.2338	13.6604	12.5321
YDL194W	3.60444	3.41461	3.86102	3.81059	4.19216	2.91746	2.83039	2.84916
YDR049W	14.0139	14.2138	14.4476	13.856	14.3441	14.9124	14.6958	14.4122
YMR039C	66.0072	70.5936	71.8836	72.825	79.6418	78.0594	73.3101	74.2341
YKL026C	12.5026	13.6026	12.6583	10.8633	9.47562	11.6994	10.7059	9.21564
YMR128W	14.3777	13.5672	14.1757	13.1684	13.6545	13.3001	12.3102	13.3818
YDR209C	178.203	191.919	185.267	185.884	210.643	172.928	172.329	182.686
YER133W-A	70.8123	65.2307	64.4635	63.3675	72.7927	54.875	47.5683	61.7972
YIL177C	0	0	0	0	0	0	0	0
YGL238W	23.0015	23.5003	22.9447	23.3071	24.3103	21.8461	21.7043	22.1317
YOR087W	8.6303	8.76144	8.08461	9.04095	10.0059	8.41257	9.49223	9.35537
YPR095C	5.36239	5.37512	5.20799	5.3509	4.8663	5.18841	4.83898	4.54858
YPL016W	5.05256	4.4934	5.20226	3.95451	3.33625	3.44512	3.01848	2.76804
YJL041W	39.507	41.1325	39.076	39.8915	43.2108	37.9197	37.8085	37.8689
YJR122W	10.26	10.6974	10.4619	10.1649	10.2897	10.1774	10.9946	10.8893
YER074W	1867.22	1832.34	1813.78	1761.57	1777.03	1849.29	1835.07	1812.61
YGL109W	23.8518	27.1403	22.0103	23.2745	23.9881	24.3326	24.2037	25.6396
YPL251W	78.8381	69.1219	72.6001	71.2137	73.4894	60.4003	62.1362	68.4375
YGL234W	152.953	141.287	139.49	125.749	134.074	125.9	121.296	109.278
YJL033W	25.5979	25.0072	24.7488	24.0283	27.224	21.9147	21.9536	22.8594
YNL339C	5.02144	7.04636	8.23674	9.34796	13.7202	8.27456	11.7474	11.3745
YBR066C	29.0393	29.2142	30.9169	30.2701	33.2092	35.6949	35.9344	30.8359
YOL133W	89.6202	87.1299	81.2589	94.1156	111.696	83.9015	87.1534	88.6085
YDR388W	109.339	115.568	112.843	119.988	134.372	116.969	116.654	127.184
YMR269W	23.9561	23.4957	24.6424	25.1801	27.1208	26.9166	24.4093	23.6604
YPL260W	29.5385	32.1741	29.5221	31.6641	36.3344	29.8744	29.7676	32.0868
YHR200W	153.984	166.163	152.43	159.336	181.858	146.49	150.999	155.661
YKL145W-A	0	0	0	0	0	0	0	0
YMR188C	64.0843	66.598	72.8144	74.3173	75.3742	67.3108	64.2767	66.5017
YGR264C	58.6398	56.3449	55.1255	53.5743	60.4094	55.2671	53.982	53.187
YHR069C	33.2427	31.4585	31.6723	29.4322	33.5549	29.5741	30.4871	29.5211
YDR233C	366.825	343.836	337.319	348.373	380.71	383.353	400.434	383.746
YBL048W	8.809	11.9061	8.3235	8.48897	6.46989	9.10805	8.54664	7.66583
YLR095C	18.9874	17.6755	18.4744	18.0645	19.2813	17.975	18.6467	18.6682
YBR196C-B	110.641	71.7547	116.503	73.6026	71.2276	70.3532	66.1557	60.9265
YDR235W	11.3555	12.5674	12.0083	12.5711	12.4691	12.1218	12.4043	11.4313
YNR063W	2.61903	2.50105	2.42006	2.56334	2.44583	2.87336	2.22281	2.53772
YOL018C	15.99	17.1457	16.5663	17.1394	18.0757	16.9257	15.6812	16.5739
YEL013W	25.9222	23.9127	23.0903	23.1428	23.8611	22.5355	21.213	21.7349
YJL091C	11.9185	12.9074	11.5261	12.0928	14.5839	11.206	13.2464	12.5348
YOR045W	1352	1362.41	1261.77	1222.33	1434.37	1366.98	1362.83	1439.99
YER087C-B	1403.7	1385.16	1368.47	1623.15	1577.07	1552.67	1557.73	1561.82
YHR041C	63.8667	63.6594	62.5799	57.4914	56.9188	59.9192	58.573	56.9783
YER056C	78.5052	67.5631	63.8392	61.8235	59.6186	60.24	61.5756	53.4288
YBR095C	13.2123	14.1814	12.963	13.0832	14.0973	13.798	13.4234	14.026
YHL049C	3.44967	2.95451	3.65241	3.45453	3.94279	3.95471	3.8362	3.17465
YDL118W	11.7282	9.77727	7.64047	9.81766	12.2932	8.58444	8.88284	8.50777
YBL011W	16.4973	17.181	16.4165	16.7855	18.8086	15.912	17.1932	16.7659
YGR293C	1.3418	1.05314	1.54817	0	0	0	0	0
YDL137W	518.115	564.9	533.387	576.159	629.206	558.48	567.622	611.051
YDL193W	21.2105	21.6342	19.6755	21.3745	25.2841	23.2955	25.2416	25.8846
YOR186W	2.03247	3.1307	1.85393	2.01216	1.59993	1.64483	1.4107	0
YMR102C	10.3141	9.78855	10.101	9.25415	7.74037	7.63458	6.89185	6.16959
YCL061C	8.50484	8.05034	8.9214	9.21101	8.39399	8.19898	8.46292	8.1047
YBL102W	75.1788	85.603	79.7426	83.3041	87.104	80.7419	90.8297	90.5088
YDR509W	9.57778	10.4735	10.2629	8.24647	6.59215	6.33975	5.11554	4.65708
YOR065W	125.238	130.607	128.831	126.478	128.898	143.804	145.921	143.368
YEL001C	183.459	187.349	181.839	196.482	245.228	206.208	230.211	228.769
YGL164C	11.5583	10.5923	11.5081	11.5358	12.9576	11.6891	11.1378	11.4557
YJL045W	1.89663	1.87305	1.8651	1.6854	1.77277	1.92921	1.81178	1.76323
YOR201C	26.4244	26.6244	26.4514	26.2606	24.0102	24.4187	24.1602	22.239
YKL006C-A	145.298	136.801	154.453	155.045	143.397	153.97	145.029	143.06
YHR028W-A	0	0	0	0	0	0	0	0
YPL173W	27.8752	28.6844	29.5491	28.5457	31.5943	27.0579	26.3942	29.288
YBL105C	14.7185	14.2235	15.4561	14.5239	13.7623	13.4172	13.3994	12.7671
YLR162W-A	37.1423	40.9031	44.8446	46.5009	36.4834	39.6054	43.711	37.9893
YKL164C	298.188	272.273	270.606	247.808	258.281	295.23	283.242	260.313
YLR462W	1.3773	0	0	1.26122	1.27553	1.26675	0	0
YPR098C	130.131	138.301	135.501	141.453	128.094	122.143	126.905	139.635
YDR490C	8.36623	9.07181	9.22499	8.9372	9.76385	7.99599	7.59255	8.37469
YDR516C	47.7877	50.364	46.9394	47.3116	63.0512	63.6054	63.8521	65.1044
YKR096W	6.96715	7.11239	7.19661	7.07644	6.31651	6.30342	6.02597	6.19269
YIL173W	2.50354	2.22414	2.14738	2.53343	2.0739	1.35997	1.06555	1.36495
YMR171C	22.0941	21.2608	21.8216	22.8871	20.9844	21.5202	21.1292	20.3705
YGR236C	3.77139	3.97689	4.40832	3.98019	1.92607	2.03075	2.16757	1.88
YML029W	8.97793	9.05943	8.25623	8.65828	8.77443	8.72861	8.82715	9.26221
YJL069C	23.113	22.2578	21.1615	20.3175	24.9209	19.3945	20.7991	20.8038
YNR037C	333.686	350.713	360.307	382.206	366.018	358.874	342.708	361.89
YEL022W	12.3274	12.488	12.5243	12.5137	12.2721	11.7261	11.1873	11.7491
YKL054C	56.6774	44.27	50.4402	41.903	41.0305	41.2024	41.4287	37.0843
YBL090W	41.5914	43.023	44.8414	46.3594	45.292	45.1917	46.2374	43.0217
YDR347W	55.5738	64.2298	58.0779	60.9012	65.3574	52.4373	58.7977	59.585
YFR032C	0	0	0	0	0	0	0	0
YJL130C	77.8066	93.0402	83.5607	96.0284	103.47	75.9185	84.2408	101.405
YMR090W	41.5389	40.1169	40.5314	38.4676	30.4355	34.6439	34.8652	35.7923
YHR042W	66.5022	62.3784	61.7923	64.466	72.4481	66.564	72.561	74.5462
YGL124C	6.83977	6.97552	6.74921	6.45136	6.02281	6.73812	5.81688	5.63754
YPL156C	14.9632	15.4485	15.6547	15.0991	17.8982	13.7716	13.2866	12.9563
YGR235C	68.7303	72.3465	70.5458	72.1228	77.5918	63.5703	63.0962	67.7784
YJR087W	103.287	105.65	112.792	124.111	137.107	116.026	104.577	117.385
YLR148W	7.24885	7.5235	6.828	7.18677	7.69102	7.38651	7.12429	7.36525
YDR445C	2.52413	2.42992	1.60477	0	1.91068	2.58189	2.10755	1.77946
YOR073W	11.7633	10.433	10.8418	11.5132	9.76461	9.98571	9.38515	8.26884
YER148W	106.322	110.177	111.442	113.997	125.287	109.352	114.979	119.239
YML124C	73.1572	77.6018	72.6034	77.0264	94.9651	76.688	78.2768	81.3162
YDR452W	23.9053	25.5559	24.7964	25.4386	27.6981	26.5979	28.0797	30.1437
YGR117C	16.9586	18.1659	16.8504	17.4669	18.8524	15.5004	14.7465	15.3744
YDL196W	3.40564	2.49581	3.18453	3.75351	1.79336	3.45507	3.55356	1.26654
YGR254W	659.673	646.885	604.91	573.091	480.951	608.123	593.368	572.391
YER188C-A	0	1.1628	0	1.16052	1.02795	0	0	0
YLR243W	37.8724	39.19	38.0684	36.9532	48.0343	37.9705	40.8623	37.6043
YMR293C	6.80468	7.52667	7.05246	6.59147	7.10367	6.95079	6.37234	6.46166
YJL218W	11.5343	11.5087	11.8594	10.7758	17.2368	3.44053	3.65155	4.35792
YDR437W	9.45558	6.73359	7.34174	7.21716	7.03012	8.875	10.6629	8.23232
YOR064C	24.2887	22.3752	23.9067	26.5946	24.338	24.4188	21.0979	21.3991
YBR138C	5.85029	5.49195	5.75577	5.89224	6.21545	5.93547	5.71164	5.95536
YCR082W	231.689	242.355	258.358	283.792	333.82	260.927	268.996	300.324
YKL147C	1.71688	2.5952	2.17774	1.63006	2.44465	1.85576	2.35357	1.79451
YAR015W	367.369	359.632	350.968	339.701	369.496	318.874	339.806	317.98
YJL057C	8.5574	8.75101	8.82813	9.27018	8.13481	10.1904	9.68685	9.01523
YDR529C	827.262	820.76	915.577	866.074	816.048	954.138	928.521	989.004
YBR178W	0	1.01016	1.05752	0	0	0	0	0
YER086W	76.044	73.3246	68.8644	69.2927	85.4922	70.9324	79.5896	72.8914
YOR003W	5.36779	5.0856	5.17656	4.95557	5.38986	5.30712	5.30017	5.00505
YOR051C	72.281	75.2442	75.1523	72.9476	90.9514	66.3718	67.9591	67.2768
YOL159C-A	33.3594	29.2867	34.3101	36.0254	30.0125	24.9704	22.7744	22.3664
YNL081C	150.217	150.423	158.533	160.301	159.77	156.55	149.968	155.393
YGL031C	1983.26	1895.84	1963.09	1890.38	1767.75	2056.47	2020.88	1867.65
YGL085W	15.6378	18.816	16.8368	17.697	20.5046	16.6463	17.3352	17.4257
YDL238C	5.18926	4.42443	4.98079	5.28626	5.19826	5.08542	4.43803	5.33153
YMR069W	2.57309	2.54221	2.50724	2.05774	2.41151	2.73237	2.64507	2.1027
YDL078C	103.971	111.218	107.247	113.773	119.028	99.9534	98.2271	104.448
YFR016C	13.9312	14.0233	14.7768	14.4977	15.0562	13.7823	13.5975	14.7636
YGR280C	78.6836	79.029	77.9912	78.458	90.9916	78.5767	72.6686	79.9006
YIL001W	9.04668	8.43462	8.55647	8.10793	8.80406	11.7412	10.8045	10.6797
YDR303C	14.8468	14.3745	14.4067	13.9671	14.1092	12.2261	12.2272	12.2506
YAL033W	50.7781	48.5912	51.7921	55.7706	55.3315	51.8368	47.0711	45.3339
YCR028C	8.41423	8.30673	8.59864	8.47381	8.331	8.75866	7.46696	7.78246
YLR218C	23.8913	26.5348	26.5839	28.9956	27.2347	24.6019	25.9022	31.9833
YKL212W	52.0211	50.4644	51.4119	49.0723	50.3043	50.8429	52.312	50.4953
YMR119W-A	22.8949	18.7734	19.537	16.782	15.8265	18.8346	17.0679	16.4989
YML105C	76.449	79.3196	77.0542	74.5931	85.6749	74.9116	77.7821	79.0212
YDR440W	10.2965	9.31538	10.3689	9.30455	10.3631	9.30124	9.31399	9.01856
YNL328C	10.5962	10.5863	9.60109	12.229	10.9936	11.6736	10.8419	10.5997
YJL151C	390.116	432.119	389.603	410.718	505.832	380.805	392.546	442.989
YJR047C	12.3257	12.982	13.5951	11.8154	11.4749	27.3628	33.6985	30.6042
YML072C	24.56	23.5199	24.5441	24.7833	23.5991	22.7298	24.563	23.7139
YIR028W	1.58089	1.56292	1.78125	1.52468	1.64727	1.30429	1.02964	1.01854
YJL138C	406.559	392.683	396.891	393.606	450.081	418.802	414.063	425.798
YOL040C	4354.74	4203.74	4454.47	4121.11	4542.31	4490.09	4379.81	4330.78
YOR351C	0	0	0	0	0	0	0	1.122
YFR051C	83.7484	86.8433	81.391	89.1877	100.251	80.9649	85.4154	89.9969
YHR038W	20.252	20.8064	23.2194	23.3228	24.2992	22.9009	23.2098	24.546
YPR054W	6.30755	6.01627	6.17511	5.97433	5.78884	5.62513	5.44294	5.44788
YDR314C	2.28802	2.10907	2.35842	2.19633	1.80466	2.72763	2.0989	1.99705
YDR467C	25.8936	27.612	23.2875	23.4408	23.1315	20.142	22.342	22.6036
YOR329C	12.183	10.1121	11.4721	10.9862	10.0893	9.29654	10.2468	9.62009
YLR028C	94.6657	96.4096	93.828	92.9641	96.0102	95.3658	92.7692	95.3166
YER045C	6.97426	6.17872	6.52447	5.87756	7.22685	5.2506	4.79983	4.9103
YFR010W-A	46.4636	48.8645	50.0891	40.3163	42.7117	53.0433	66.6952	70.7216
YPR144C	31.0634	29.5146	28.2864	28.536	33.8222	27.6684	29.1082	28.4405
YPL249C-A	6398.77	6272.53	6239.57	5731.7	6345.17	6042.96	6020.47	6443.56
YLR043C	1812.04	1926.64	1886.49	1934.56	2205.15	1823.04	1926.1	2127.59
YMR125W	27.8852	28.6152	27.0695	28.0077	29.7186	26.7635	25.5532	25.1025
YDL134C	56.4464	54.331	53.3469	55.7044	52.8532	50.6914	51.5959	51.3266
YGR121C	13.3054	13.3335	13.5672	12.9159	12.7148	13.1095	12.657	11.5674
YMR325W	0	0	0	0	0	0	0	0
YPR128C	25.6035	28.2463	24.0623	25.9246	31.6854	29.96	29.3588	30.3347
YER088W-B	1.72308	0	3.26371	1.59542	0	1.76621	3.37663	2.58403
YMR141W-A	30.8233	26.643	28.2643	18.8447	14.83	24.5997	25.6087	15.0011
YDR117C	20.7359	21.9992	21.5604	22.6518	23.9055	21.768	21.3901	22.4363
YGL043W	57.4155	56.6676	55.8522	59.9301	68.1308	63.9454	60.0293	67.5614
YGR139W	2.75525	3.82133	3.55208	2.32687	1.80989	3.48294	2.59886	2.60633
YOR156C	5.661	5.35644	5.76076	5.38671	5.45049	5.59506	5.30778	4.87311
YDL226C	81.64	91.4582	86.54	85.325	99.7261	86.032	88.7284	90.3378
YJL121C	181.614	204.789	182.308	204.094	230.509	203.642	223.643	221.152
YGL182C	1.64559	0	1.18231	1.22183	1.61779	0	0	0
YGR061C	44.3047	41.3051	42.4035	40.2732	36.1211	34.4929	33.2076	32.8921
YHR158C	10.5627	10.3836	10.7603	10.5181	9.20721	9.26378	9.42434	9.10359
YGR213C	3.385	4.34882	3.91925	3.51893	2.80899	3.17906	2.89638	3.37935
YML070W	48.3183	48.8722	47.6102	46.8808	49.4427	40.091	42.5228	44.9768
YOL038C-A	78.1623	105.407	104.589	150.697	108.848	97.6578	99.5939	135.246
YCL064C	195.74	235.293	203.11	215.596	284.578	202.405	220.766	229.892
YBR144C	0	0	1.0047	0	0	0	0	1.52644
YMR015C	25.4906	25.4659	24.9718	26.344	31.7297	26.0649	26.951	27.7467
YML071C	11.6014	11.285	11.9779	10.8066	12.9025	11.9447	11.2271	10.9874
YFR028C	29.7164	28.4842	29.4801	27.4319	32.8203	28.1165	26.6458	27.1044
YOR129C	5.65345	5.40919	5.04262	5.08523	4.96147	4.59288	4.62687	4.55557
YIL088C	31.2271	32.1848	30.7643	32.6682	37.7562	32.4175	34.4215	32.4656
YMR145C	76.9137	69.4158	70.0236	62.5054	59.7964	64.6474	67.1858	62.0208
YJL222W	2.66334	2.51789	2.95861	2.37509	2.71911	2.34903	2.66388	2.35765
YDR517W	63.7651	68.571	60.1285	64.1226	76.1097	64.6078	66.8175	67.0346
YLR178C	89.7579	95.2818	95.9303	93.7001	64.2764	90.5946	88.3959	95.1706
YDR371C-A	0	0	0	0	0	0	0	0
YNL258C	10.5703	11.2759	10.8511	11.0695	12.4553	11.4268	11.3069	11.497
YLR441C	1409.57	1355.48	1383.23	1369.71	1439.04	1448.74	1442.45	1308.44
YGR119C	49.2506	50.4722	50.9678	49.3962	54.0971	47.431	48.3651	49.2501
YJR013W	14.4056	15.1724	13.3124	13.523	15.9352	15.7902	15.4002	15.0667
YIR027C	2.725	2.68671	2.62961	2.30026	2.8732	1.85055	1.78745	1.57697
YDR246W-A	11.6195	11.9359	12.5945	15.7535	14.099	9.53226	12.7455	12.9243
YNL339W-B	0	0	0	0	0	0	0	0
YBR151W	136.747	149.347	145.353	149.974	173.676	153.816	158.859	155.035
YDL167C	25.328	24.8971	25.1462	26.035	29.8574	25.1823	25.062	25.647
YBL005W	9.90084	10.5149	9.65993	9.53756	9.8738	9.519	9.40273	9.2598
YOR377W	10.7353	10.5082	10.9864	11.3665	11.1073	13.2685	12.2426	11.5521
YDL037C	4.66645	4.64523	4.06577	3.06014	2.1767	10.5099	9.86439	8.7729
YKL193C	33.2444	35.855	34.631	36.252	40.2201	36.1251	37.1111	39.0282
YDR223W	3.51128	3.14326	3.43604	3.42055	3.07695	4.05932	3.93207	3.68274
YDL053C	125.807	120.732	129.733	121.861	120.837	125.467	115.803	114.49
YOR103C	115.174	113.445	107.57	116.284	114.095	113.786	114.652	110.248
YGR093W	14.2446	13.3376	12.6172	12.7999	13.7514	12.9883	11.9352	12.1876
YHR137W	87.2945	99.0427	89.8886	97.4741	114.477	102.345	106.972	114.106
YBR226C	3.70166	4.78579	4.61418	4.85944	3.47594	3.00391	3.45729	3.97635
YGL091C	18.5006	20.789	17.2795	18.1299	20.5554	17.4208	18.1856	19.0664
YPL141C	8.12153	8.20018	8.2182	8.05255	9.28063	6.20451	6.98038	7.3722
YGR258C	6.43719	6.49539	6.80586	6.84483	6.86596	6.18901	5.7347	5.85384
YBR141C	17.622	16.2517	15.3209	16.2326	18.2199	17.797	15.2546	17.4858
YJR091C	10.3617	9.58513	10.1948	10.1523	11.158	9.17449	10.2409	9.3375
YMR243C	67.6155	65.1457	60.5047	64.6438	77.4724	63.0614	70.9222	64.2474
YPL235W	48.9363	51.2503	45.1568	47.6678	58.4776	48.1774	48.6061	49.1226
YDL172C	14.4192	12.6281	15.9751	11.5168	13.0981	17.2967	12.051	13.2091
YNL230C	13.9987	12.7623	13.0514	13.1492	10.2822	12.8085	13.5197	11.3743
YEL028W	9.24264	9.62885	11.7046	9.96453	9.93165	9.07571	8.61745	8.21276
YAR073W	0	0	0	0	0	0	0	0
YER095W	24.8678	26.0592	23.9283	25.5946	24.4726	39.8487	39.8428	39.6863
YNL231C	70.528	75.3498	69.5742	72.0827	79.8366	66.1551	65.5165	64.2052
YPL183W-A	208.624	209.334	204.881	216.612	215.885	210.179	192.641	204.958
YDR143C	21.7968	19.3364	19.4498	18.5861	19.6355	19.3608	20.8405	18.1984
YGR207C	86.3511	90.1394	89.6366	94.1611	90.0104	88.335	86.6768	89.9841
YPL066W	30.5873	30.1226	30.7983	28.146	28.1045	28.1147	27.0046	25.5191
YOR152C	10.8526	12.7565	9.74138	11.8248	11.1638	9.25849	10.2685	11.2745
YAL027W	14.3548	14.8086	14.4958	14.0312	14.9971	15.5019	14.1347	15.1856
YHR013C	109.632	114.202	120.76	114.305	134.089	119.554	127.408	123.717
YJL080C	54.6981	53.1681	53.5703	52.7979	49.3357	47.1799	50.2993	49.5539
YOR269W	7.2074	6.71844	7.40123	6.74291	6.03937	5.49195	5.12485	5.56625
YIR038C	104.771	117.281	111.847	110.04	76.5126	83.0026	88.5487	94.4088
YFR052C-A	176.856	181.36	178.511	168.349	192.299	253.585	268.909	253.293
YOR344C	116.187	116.853	120.725	110.083	99.6099	112.636	106.234	99.3474
YPL049C	65.0575	64.3337	60.672	62.2187	67.6556	63.6391	65.1472	59.736
YML065W	9.9794	9.52112	10.6623	9.37777	9.73967	9.20358	7.81198	8.45981
YFL049W	10.9187	11.4799	11.8791	10.9318	11.5784	10.2938	9.55868	9.566
YDR062W	45.2598	44.6957	42.7299	42.9906	48.6213	43.6081	46.3198	44.6408
YLR237W	13.7733	14.4398	13.7521	13.8412	12.5577	19.6879	20.1631	20.9525
YDR327W	184.605	186.839	187.01	201.753	225.895	180.737	211.652	203.535
YMR074C	176.864	181.648	195.141	195.189	204.915	189.004	194.621	209.456
YIL121W	31.2772	29.47	28.2521	29.027	31.9348	23.8015	24.4314	24.7227
YGL048C	98.3293	105.161	102.836	106.159	128.245	103.78	107.779	114.945
YKR010C	8.64265	7.29728	8.27875	7.58857	7.2651	6.89459	6.77312	6.56418
YOR221C	31.511	35.0082	32.8511	35.0628	40.4424	31.2952	34.5218	35.4774
YOL047C	2.38591	2.80392	2.78747	2.35996	1.72397	2.95381	3.03288	2.63972
YGL203C	14.7541	14.5483	14.4478	14.284	14.2991	15.4778	14.9602	14.3231
YMR164C	5.81349	5.11098	5.82426	4.97022	5.275	6.71578	6.56971	6.89894
YGR113W	25.9244	25.5928	26.3314	27.0203	26.3838	27.3949	25.0231	27.7016
YIL171W-A	0	0	1.13569	0	1.308	0	0	0
YPR160W	20.4198	19.7985	20.5488	20.9767	13.4504	23.8936	23.3533	26.0909
YDR381W	320.856	346.692	331.048	358.925	422.035	312.3	336.294	363.37
YDR140W	38.501	39.8396	41.6618	38.7811	48.8071	40.2593	40.7138	43.365
YDL117W	9.79498	9.83833	9.74318	9.97304	9.77845	9.72507	9.071	9.00198
YGR178C	46.0574	46.6391	46.4458	45.7497	49.4443	46.3321	45.5008	45.7839
YER124C	85.2753	78.0955	84.1501	81.128	71.732	92.6296	89.6734	78.772
YGR144W	1.74788	1.63729	1.47742	1.35782	1.96595	2.31515	2.12598	2.37724
YMR252C	43.0768	41.7209	40.9061	41.6861	38.6915	35.837	33.2742	37.6624
YIL157C	88.2245	95.089	93.4645	94.2785	102.242	94.7542	92.4554	98.0031
YPL229W	27.2759	26.1296	26.0562	26.3693	30.466	25.2201	25.5499	28.3423
YGL147C	1672.94	1633.74	1596.04	1584.1	1595.74	1767.09	1703.4	1588
YJR041C	9.26859	8.48791	8.9064	8.71169	8.47741	7.97864	7.90727	7.89016
YKL028W	27.4464	29.3413	29.4694	28.8785	33.5609	29.2182	29.1758	31.8926
YNR053C	60.4324	60.3839	59.9076	55.4249	64.2444	63.449	58.6917	55.9043
YKR003W	24.664	27.0972	26.4063	26.3583	26.6617	24.4535	25.08	23.7087
YKL146W	15.5705	14.9547	14.3166	15.2859	17.0571	16.6533	17.2999	16.9955
YLR446W	6.95626	7.24088	7.33251	6.76049	6.5373	9.10919	8.06847	6.85815
YLR464W	0	0	0	0	0	0	0	0
YBL030C	397.337	389.515	374.211	378.624	415.797	407.255	460.957	452.439
YER168C	13.4191	13.9131	13.4023	13.7668	15.7109	12.8812	12.4055	13.0581
YLR355C	410.06	391.69	381.961	335.322	390.402	347.267	330.778	297.46
YIL046W	13.6063	13.2594	12.7944	12.8632	13.5015	12.5728	12.9044	12.7799
YDR479C	12.6128	11.5495	11.3953	11.0212	11.3118	11.1974	11.7834	11.1647
YGR268C	42.9079	47.0741	47.2967	51.4297	64.2281	49.3046	48.8494	57.7694
YNL134C	99.4509	108.35	107.509	104.9	104.101	119.828	117.604	132.162
YLR221C	82.5608	84.9835	88.5302	85.3941	100.155	99.4921	92.2595	91.8068
YGR220C	37.3754	39.3421	35.453	36.47	39.5637	34.2168	38.9587	40.297
YDR100W	120.898	126.116	121.456	144.869	154.064	126.559	131.8	132.111
YLR003C	52.0508	48.8081	54.1495	53.7936	59.6223	51.4478	49.6546	50.9013
YNL010W	233.74	263.199	244.847	242.066	277.045	238.362	249.658	256.036
YHL037C	0	0	0	0	0	0	0	0
YJL056C	4.40217	3.82681	3.73635	3.95159	3.99593	3.36552	3.48196	3.40589
YFR043C	15.5048	16.5697	15.9903	15.8655	18.5512	15.7127	16.7456	14.7348
YDL130W	3667.66	3562.8	3308.25	3548.51	3355.94	3516.79	3574.53	3437.86
YNL208W	285.427	310.329	285.676	284.187	295.932	323.145	358.103	379.538
YFL060C	8.16566	9.79937	9.42078	11.8692	9.36526	7.27021	7.04347	6.52374
YGR040W	17.3215	16.1547	16.1729	15.1854	15.4998	15.0378	13.9142	14.7481
YMR194W	1581.74	1515.07	1585.73	1451.76	1360.46	1667.09	1511.93	1395.94
YBR056W	32.8014	34.9078	34.0971	37.0048	32.2602	33.2891	33.4763	35.9581
YGL029W	115.861	110.401	132.926	111.906	129.147	134.359	101.509	106.506
YBR049C	21.4039	21.1033	21.3962	20.4403	20.3546	19.0932	18.7448	18.0222
YGL171W	20.821	22.624	21.1844	20.5824	26.0844	22.7329	21.8222	21.3273
YNL171C	5.03729	5.40578	6.29075	6.11905	5.21901	6.83134	5.28524	6.19594
YHR067W	16.1827	17.4719	17.6301	16.5961	16.0952	16.8068	16.7483	15.3774
YOR247W	601.043	513.144	574.155	587.274	618.142	681.339	704.358	658.158
YLR155C	53.9839	61.5507	57.1796	55.338	57.6631	47.1169	47.397	49.2466
YOR276W	370.996	400.451	420.209	399.696	466.86	416.305	415.544	424.493
YML102W	18.0036	17.1781	16.2802	17.1807	20.0379	16.6606	17.1114	18.0149
YLR154W-E	331.495	336.885	394.075	431.157	599.014	441.365	481.637	515.258
YPR163C	222.288	221.894	220.056	214.339	260.244	228.716	229.828	233.63
YDL007C-A	0	0	0	0	0	2.02785	0	1.42426
YCL021W-A	18.5359	16.7911	21.2258	17.8242	13.4327	11.689	11.2498	11.2727
YOR277C	139.786	126.585	114.764	116.83	116.194	122.464	143.621	149.068
YDL095W	47.2041	43.9958	45.6144	46.3876	45.252	43.5684	46.6673	46.4176
YDR076W	5.98743	5.36057	5.30464	5.7415	5.55937	5.86857	5.55853	5.15752
YLR287C-A	12856	13063.7	13265.1	13767.9	13132.8	14371.3	13949.4	14293.7
YOR357C	61.6971	66.5652	61.9021	62.6358	67.9411	57.8184	59.084	57.8136
YER046W-A	4.47908	3.7091	5.135	4.49046	4.72374	4.75595	3.79824	3.62757
YER187W	5.68603	4.69725	4.55568	4.32754	6.14462	5.61096	5.71298	5.02667
YLR375W	69.8253	67.9501	72.2642	68.3121	53.9272	61.2254	57.1736	54.5862
YLR416C	0	0	0	0	1.55345	1.3202	1.32345	1.32582
YGR171C	9.34825	9.18627	9.0906	9.63001	10.4326	8.49973	9.32247	8.76343
YMR209C	15.869	16.0347	14.5028	14.6005	18.8954	14.2931	14.2011	14.7973
YMR054W	13.5878	12.9698	13.4179	13.4897	14.0169	12.5016	12.9988	12.8354
YDR013W	25.0834	26.2226	24.6273	26.9618	24.3448	22.2492	22.0273	21.4145
YLR163W-A	0	0	0	0	0	0	0	0
YFR009W-A	0	0	0	0	0	0	0	0
YJL101C	20.7305	20.1113	19.1511	19.6533	21.1557	17.1408	17.1018	16.6837
YHR122W	30.4387	31.0699	30.883	31.191	37.1917	27.7828	29.3952	30.1828
YLR108C	4.35086	5.1178	4.22503	4.3702	5.24814	4.31238	4.56585	4.94528
YCR028C-A	533.763	568.997	539.678	641.98	595.315	601.887	617.253	636.772
YKR015C	2.43688	2.15199	2.37557	2.25746	2.0282	1.83701	2.25411	1.83398
YDR454C	475.61	477.602	480.251	499.697	540.564	564.593	569.345	594.344
YBR093C	8.94637	8.34275	8.17311	7.90221	8.22751	9.67513	9.91445	8.99834
YGL041W-A	60.4931	68.9871	66.6622	69.5487	78.8662	69.5524	74.8518	74.8283
YMR005W	36.4194	39.3684	36.7967	39.3089	44.1087	40.3238	39.7985	39.8455
YER076W-A	11.2978	12.5109	9.5969	11.9469	12.9814	13.59	12.195	10.8338
YDL001W	13.2716	12.5624	12.1773	11.7611	12.0033	11.2856	10.7022	10.8485
YKL137W	166.091	177.614	195.715	206.711	202.148	219.343	190.563	212.428
YIR011C	32.8315	33.4367	34.8497	32.2922	35.5876	32.3293	30.9384	30.7572
YER145C-A	42.2354	44.5211	42.3478	42.3207	41.8286	44.3341	39.8309	41.2816
YNL289W	63.8671	65.6543	65.3847	61.0661	47.7048	49.1967	48.7257	50.0274
YKL205W	10.4377	10.5305	10.2532	10.2123	10.1247	9.2337	9.19738	8.93213
YGR092W	11.3209	10.9552	11.3403	11.7298	11.7655	11.7224	11.5538	11.2281
YHR134W	16.4543	14.9775	15.6882	16.4703	15.675	18.3529	17.0845	15.8417
YPR204C-A	0	0	0	0	0	0	0	0
YPL191C	6.98611	6.01413	7.15139	7.10155	5.32041	5.94557	5.56523	5.48477
YDR465C	41.0716	42.1878	40.6029	41.7589	48.5871	40.2739	40.6072	41.8068
YHR028C	16.6743	17.4474	16.3376	17.6944	18.266	17.0968	18.9374	18.4513
YCR096C	44.355	35.6941	38.0593	43.4534	34.1342	48.4555	42.6012	36.9672
YNL084C	59.5293	63.6373	66.2008	66.1797	74.9334	66.9824	68.6217	67.0074
YDR250C	7.01928	7.00724	9.35861	11.6984	9.17691	9.48034	10.2505	9.68731
YGR233C	6.46463	5.9751	5.80347	6.1587	6.06231	6.32415	6.63957	6.20542
YKL059C	20.5794	20.837	19.755	20.8981	22.2393	23.7816	23.0598	22.9042
YMR130W	39.4162	40.6805	43.1458	45.5951	49.5156	46.8444	45.5386	45.8194
YLR257W	174.849	166.664	184.278	168.438	150.447	176.732	154.894	134.637
YLL038C	20.3074	19.333	19.329	18.3931	19.2145	18.1451	18.4203	16.7718
YML061C	10.9584	10.7182	11.0643	9.94486	10.498	10.3651	9.79278	9.5093
YKR037C	22.1609	23.0479	21.7474	21.7333	24.8632	20.561	20.3394	21.4842
YHR197W	16.5962	15.7405	15.4122	15.6455	17.2623	17.1747	17.1278	17.3683
YJL028W	0	0	0	1.12895	1.38299	1.77515	1.43446	2.76887
YDL086C-A	0	0	0	0	0	0	0	0
YIL038C	18.2193	18.9099	19.5746	19.2737	21.1107	17.3671	17.7598	19.2586
YPR176C	26.5292	27.499	25.9655	27.2829	27.5681	32.6745	32.0139	32.3065
YLL007C	4.49533	4.50852	4.8284	4.8587	4.96161	4.572	4.88942	4.65849
YLR141W	10.9285	10.4083	11.0395	10.2047	10.5328	11.6774	10.7762	9.77553
YOR208W	5.3988	5.74272	5.93729	6.05495	6.07247	5.24501	5.78338	5.51115
YMR238W	17.2735	17.7616	17.1477	15.5081	18.71	16.4732	19.3592	17.9035
YBR052C	212.133	232.912	226.901	242.433	240.842	226.827	235.079	249.918
YHL026C	13.9974	13.9842	13.2114	14.3129	12.8618	13.8075	11.6589	10.6307
YMR187C	8.42901	8.20746	8.2264	8.58345	8.48504	8.61191	8.95222	7.95689
YGR066C	2.73232	2.41511	2.85991	2.59689	2.05004	2.17944	1.74602	2.05954
YPL094C	141.913	147.615	138.546	141.259	149.572	145.776	156.017	154.862
YNL237W	7.57814	8.80263	7.92201	8.01435	6.33448	7.24331	7.01225	7.11455
YKL194C	10.4223	11.3264	9.94942	12.024	11.9899	10.1262	10.8893	10.2754
YLR204W	136.031	139.709	140.455	145.183	151.668	151.221	148.081	146.75
YOR356W	24.9687	24.9714	22.2753	25.2753	28.9326	25.7779	27.8446	27.0303
YER117W	2507.49	2398.69	2345.27	2254.52	2312.97	2477.33	2387.33	2264.98
YDR519W	194.743	207.797	210.902	224.856	229.365	219.091	216.836	237.996
YNL114C	62.2109	58.3808	54.9417	49.5404	54.2765	48.918	50.3195	51.366
YDR511W	69.0608	67.233	70.0474	72.9452	77.5058	76.628	76.1831	80.2585
YHR047C	18.7444	18.6313	18.5172	19.8525	24.32	19.9217	20.9614	21.7586
YDR234W	29.7654	30.3936	28.0934	27.7834	32.765	27.7089	27.2664	26.5037
YGL255W	8.97602	8.57294	8.65942	7.91209	7.73046	8.12201	6.67736	7.40449
YCR059C	62.3106	65.6196	61.4453	62.1954	70.2682	73.9388	73.6888	75.314
YNR012W	20.2684	19.0406	18.7839	18.3932	21.9054	18.3079	18.2214	16.5807
YJR094C	6.74711	6.29256	7.39499	6.7422	7.36812	4.29308	4.0174	4.11358
YJR159W	3.16627	3.45066	5.75416	3.9266	6.19335	4.36081	2.96381	3.99848
YGL114W	10.318	9.98406	9.64678	9.58094	9.78846	9.50043	9.35684	9.36014
YLR350W	113.203	109.165	114.673	105.102	111.996	107.642	109.062	100.178
YLR312C	2.47257	2.00526	2.29346	1.96575	1.1162	1.46142	1.18484	0
YNL109W	8.19708	7.78318	9.00044	8.94001	8.59188	7.77601	11.3701	11.5157
YMR030W	6.86709	8.06244	7.78523	7.11764	7.10648	7.65374	6.84223	7.58549
YDL008W	50.9191	50.0371	48.311	51.9871	56.92	53.9576	55.4111	56.1681
YNL101W	10.9511	9.95848	10.1018	10.0834	10.3843	9.12367	10.0425	9.35372
YGR155W	236.974	240.287	229.549	235.364	256.681	210.89	220.016	218.546
YMR182W-A	34.6217	37.2238	42.6094	43.8153	26.0188	30.0878	34.1268	38.8895
YDR015C	0	0	0	0	0	0	0	0
YAR031W	6.21097	5.15262	7.31664	6.79493	8.08554	2.71748	2.88417	2.66477
YML083C	1.10427	1.00764	1.33502	1.11139	1.1744	1.24977	1.45077	1.10035
YLR124W	4.75677	4.44009	4.46847	5.01833	4.91287	4.51112	2.8195	4.28682
YNL196C	2.03078	1.99972	1.96725	2.46275	2.64655	2.59867	2.60585	3.01965
YIR020C	14.0967	11.3908	11.5878	15.4432	10.3562	10.9898	11.0527	10.7199
YPL158C	14.2117	12.8742	13.7076	12.796	12.8162	13.4599	12.1315	11.8708
YAL029C	12.3865	12.4008	12.2798	12.2088	11.7412	10.3717	10.3645	10.0423
YIL021W	59.6894	62.9596	57.6649	57.8173	67.3376	55.9233	60.4922	60.7354
YLR063W	15.0022	14.656	14.2496	13.8939	14.8295	14.4534	13.6958	13.242
YML024W	2566.9	2606.08	2608.37	2464.76	2491.67	2495.91	2576.26	2484.77
YER066C-A	7.02621	6.12131	6.21492	7.67083	8.10902	9.53772	8.3528	10.0156
YDR041W	72.5822	82.7376	83.6493	84.8866	93.8671	72.7275	72.6647	78.8245
YJL063C	89.3543	92.7454	85.4064	90.7679	97.111	90.664	89.1227	94.5108
YNL138W-A	72.1058	85.2389	72.8786	67.9616	84.2117	77.6667	72.3299	78.5378
YDR227W	8.41659	7.9545	7.97351	8.1337	7.50385	7.76541	7.29466	7.7146
YNL296W	3.04877	3.89732	2.60223	3.21736	3.01103	2.49965	3.5471	1.7786
YER106W	0	0	0	0	0	1.38341	1.34575	1.27818
YDR530C	22.978	22.6735	24.6603	21.577	24.348	22.1381	21.8761	22.7408
YDR412W	39.2341	43.0112	46.2312	45.4614	50.5686	47.9543	42.8094	43.6691
YHR128W	187.184	197.364	185.617	197.878	249.799	211.097	225.881	230.241
YDR301W	6.41623	6.72684	6.44121	6.81089	6.60305	6.24099	5.98516	6.59295
YKL050C	1.41407	1.24912	1.57425	1.37602	1.28104	1.20208	1.13526	1.02607
YPR105C	14.3013	13.8135	13.8578	14.6168	14.8324	15.18	14.7417	14.6016
YPL135C-A	0	0	0	0	0	0	0	0
YHL024W	3.78628	3.76921	4.0596	3.93331	3.649	3.04635	2.9435	3.63625
YLR392C	6.40544	6.21673	7.23156	6.04881	6.7728	5.82723	5.88937	5.26921
YCR004C	242.429	258.206	249.912	264.141	264.408	241.962	253.058	261.521
YDR355C	4.21935	6.43714	7.6274	7.82496	8.22427	7.17516	8.08124	5.35573
YMR037C	16.6	14.8962	16.5004	16.1678	14.5425	13.5051	15.2292	14.0181
YDL011C	13.5941	14.9416	12.3778	12.7344	13.7266	12.2288	15.1406	13.7534
YIL007C	21.4439	22.6906	23.6148	23.6911	25.5483	24.947	26.1402	25.9302
YNL097C-B	134.767	98.7387	109.996	88.1224	96.7468	129.892	109.293	101.308
YNR034W-A	108.33	103.361	126.116	110.152	78.426	171.83	157.354	152.676
YBR181C	852.941	861.103	831.945	732.859	800.666	800.831	806.73	738.986
YAL047C	7.76057	7.62449	7.77794	8.05455	8.21775	7.54392	7.66991	7.73612
YHR057C	61.4172	65.3232	63.276	66.9522	73.0758	61.0328	65.7811	69.2309
YLL025W	9.03996	8.52892	11.1766	10.1334	7.37895	7.65989	6.24171	7.44728
YLL018C	180.501	190.03	182.804	182.237	216.891	178.382	187.605	192.747
YNL082W	6.31397	6.57081	6.13858	6.77082	6.99404	6.06881	6.00298	5.68812
YOR133W	275.168	283.464	265.418	268.354	308.628	253.26	266.118	288.383
YGR073C	16.4064	15.946	18.4402	18.9328	18.7804	16.914	14.6702	18.0725
YPL269W	7.89276	7.85336	8.76693	7.82271	7.33857	7.90996	7.04195	6.64016
YLR201C	46.5885	49.6073	47.4767	50.4594	53.8186	48.5157	50.1394	48.1714
YDR538W	21.7641	19.3776	18.501	21.2973	19.9812	14.2014	14.8181	13.9664
YMR264W	106.746	113.585	111.683	118.609	125.407	100.144	104.5	107.642
YJR156C	2.69271	3.23455	3.10408	2.92883	3.0296	1.84171	2.48658	1.99582
YNL073W	15.8702	16.5285	15.8172	15.1309	14.4045	15.0113	13.5115	14.2312
YCL052C	27.8272	29.0769	28.1239	29.0782	31.1547	27.8821	28.2922	27.0846
YMR225C	214.973	223.057	235.17	255.44	229.43	255.34	244.837	248.226
YBL008W	6.06943	5.79376	5.65856	5.73789	5.52338	5.8468	5.01035	5.51143
YOR020C	1270.48	1424.55	1368.9	1479.88	1751.78	1336.16	1409.96	1595.9
YIR032C	5.96053	5.7567	6.49807	6.03055	5.21603	6.50234	5.56051	5.03116
YLR206W	31.8603	28.6659	30.0523	29.2612	30.8188	27.7972	29.0999	29.42
YKL121W	5.42199	5.23332	5.3195	5.78254	5.62942	5.54838	5.65232	5.49811
YEL017W	37.5989	34.6179	35.7613	31.7586	33.3437	34.743	32.0573	28.6216
YFR015C	16.0434	13.9196	15.3901	15.6318	13.5342	16.9326	15.4909	12.6087
YPR046W	15.5761	17.134	19.122	14.6245	14.9322	17.0233	13.8828	12.9214
YDR112W	15.6134	17.7476	16.3049	15.6985	11.314	13.5704	14.2769	12.6287
YER087C-A	7.18752	7.61975	7.22634	6.47478	6.1664	7.45318	7.17868	5.50619
YGL111W	38.5941	38.3055	39.3754	38.6409	44.8246	38.6158	38.8707	39.9842
YCR034W	60.899	58.769	52.0153	56.8402	72.3518	63.9695	74.3745	69.5955
YPR005C	7.50676	7.42112	7.91868	7.58757	6.61544	6.1054	6.11312	5.60795
YDR500C	4115.7	4301.48	4112.23	3712.02	3828.65	3627.68	3774.34	3788.4
YNL115C	8.98302	9.10876	9.60397	9.84954	9.01569	7.97889	7.97618	8.04735
YBR242W	49.0201	49.388	49.304	47.5183	54.9804	51.9087	52.7205	52.4464
YBR126W-A	961.873	1113.89	972.834	958.389	966.535	1057.45	1072.66	1055.08
YBR257W	16.5902	16.9389	17.5452	17.4611	20.322	16.5091	15.4796	16.3154
YNL270C	0	0	0	0	0	0	0	0
YHR020W	63.9672	63.153	57.2706	55.7291	66.2222	58.0267	57.1098	55.4286
YBL099W	192.276	192.747	195.046	195.082	189.067	201.337	200.809	209.031
YBL056W	73.1634	75.7662	69.5643	73.8918	84.6181	71.4064	76.9596	78.0687
YKL053C-A	236.571	261.049	236.885	275.988	303.942	289.67	286.612	316.311
YMR190C	4.87658	5.00465	4.85107	5.0872	4.82155	4.42797	4.09281	4.29324
YKL052C	35.2204	35.0329	35.7266	35.169	31.0418	32.7125	32.4441	30.3679
YOL096C	12.2774	13.0677	12.6451	12.8083	14.88	12.5906	13.2386	12.6521
YNL249C	5.23174	5.51345	5.33341	4.77486	4.78572	4.95516	4.78774	4.3075
YDL048C	104.684	79.3489	93.7848	74.3617	50.9107	93.0267	86.3244	70.142
YFL038C	478.203	523.568	504.036	473.327	543.163	490.089	492.258	516.594
YOR072W-A	4.32889	2.88945	2.75474	1.54292	1.79569	2.63687	2.81687	3.3108
YDL062W	14.8904	11.7028	10.6118	10.1138	13.8356	9.96755	10.0082	10.515
YPL086C	26.7502	26.647	25.3497	25.659	32.2101	26.8669	27.575	27.6315
YDL218W	3.14783	2.71801	2.57201	2.99612	2.98054	1.99941	2.36606	2.42255
YNL112W	111.373	99.813	99.944	85.5561	95.3262	87.1042	79.3401	76.8116
YNL241C	76.0202	79.9428	76.6194	79.0445	83.1061	73.7752	75.0065	77.7503
YLR215C	16.546	16.2604	15.051	14.7849	16.6011	16.4909	16.8348	15.8642
YDR174W	163.463	156.131	164.794	155.568	149.57	149.486	138.686	142.223
YHR069C-A	13.2931	14.4474	11.6375	14.7209	17.6346	13.0581	10.1485	15.9125
YIL077C	18.5981	19.2739	20.2095	18.2763	15.6574	17.5422	15.7	15.6092
YKR049C	79.3101	91.7618	95.5261	90.8889	77.828	65.2984	65.1354	69.419
YLR466C-B	188.004	149.968	130.091	108.242	71.8486	93.3479	93.5902	110.979
YIL104C	9.74503	9.98463	8.85863	8.74113	10.0065	9.07369	9.1596	9.12915
YML007W	27.0309	26.3168	27.5902	27.0657	29.4917	24.525	24.3621	24.2673
YBR198C	24.1674	23.4467	23.472	24.5637	26.2161	21.9763	21.2296	21.6701
YPR092W	5.60779	4.32139	6.27037	3.59962	2.25068	3.39856	3.78581	2.71831
YHR082C	16.6263	16.9718	17.4777	18.7362	19.8522	15.1488	16.5374	18.6943
YHR153C	10.2004	11.4583	11.4813	12.7112	12.8621	9.73775	9.7308	10.3759
YDR170C	15.4867	15.4603	16.2503	15.4356	13.6301	12.9629	13.372	14.3368
YIL162W	21.1814	22.2345	20.4484	22.2268	27.4928	8.7011	8.27197	8.7025
YKL165C-A	6.85826	6.95491	7.08474	5.74657	6.74625	5.12348	5.28049	8.2084
YDR282C	8.1451	8.27929	8.33777	8.54808	8.06901	9.19474	8.14491	8.46531
YLR051C	66.4206	70.0043	72.6871	72.8764	81.488	74.0477	71.3057	74.5177
YER004W	98.8927	103.268	95.834	102.052	124.354	99.3074	101.995	110.338
YLR134W	4.59776	4.79751	4.92249	4.78195	4.66907	4.20289	4.11294	4.71842
YNR011C	8.27666	8.65454	8.75297	8.59308	8.72495	8.25603	8.31768	7.76704
YNL207W	32.5837	32.8316	31.0839	31.8298	37.1724	31.6596	31.817	30.5602
YCR087W	79.6597	80.4759	83.7241	84.861	96.4668	93.0569	86.337	87.6559
YKL127W	44.0633	45.7593	42.8627	40.8081	51.0028	45.1978	45.0137	45.5456
YER021W	89.4455	98.1402	92.8752	96.7264	116.711	92.863	95.515	97.4218
YOR066W	12.8016	11.6579	12.5389	11.4342	11.4164	9.34292	10.9948	9.65327
YDL009C	14.4306	8.90193	11.9413	10.6299	10.3289	10.8918	10.4349	10.0606
YBR070C	30.5965	32.1816	31.2578	30.9854	35.6803	33.2271	32.1985	30.2799
YDR290W	0	1.10306	0	0	0	0	0	0
YNL125C	12.1011	11.3249	11.5086	12.6091	11.5122	13.0913	13.5512	12.5095
YDR292C	36.5436	36.7952	35.9039	37.9199	43.0837	36.8007	35.362	37.6329
YML047W-A	0	0	0	0	0	0	0	0
YDR306C	13.5635	14.5416	14.4894	14.9032	15.9873	14.843	13.882	14.4096
YPL096C-A	184.501	197.381	182.072	175.092	170.658	199.734	179.93	177.347
YGR011W	30.4409	32.8802	35.0994	36.5143	31.523	40.7853	33.4307	37.544
YER175C	17.826	20.9888	21.0176	21.8721	21.2194	23.1999	23.6809	26.9713
YHR213W	2.06836	1.75929	1.88395	1.77218	1.74031	1.72679	1.23973	1.25125
YDL144C	37.5035	38.728	38.7952	40.692	44.8046	49.2129	48.9317	52.8649
YPR117W	4.0966	4.12872	4.24338	3.822	3.2906	3.56065	3.44846	3.67306
YML110C	145.2	159.457	156.818	168.239	180.288	153.307	166.1	178.23
YFL065C	0	0	0	1.42083	0	2.05579	0	0
YNL045W	25.7422	27.2607	26.5862	25.7636	29.2255	28.5081	28.9519	30.8062
YOL115W	12.4515	12.7026	12.7092	11.2529	12.9813	11.2086	11.3145	10.8883
YER088C	89.8195	73.0927	76.7132	67.5031	52.6615	61.505	66.1881	56.7585
YLR358C	25.0213	22.7146	23.5918	22.2111	21.3394	23.7075	22.0926	20.6176
YNL302C	1831.99	1837.23	1713.16	1682.04	1690.82	1752.84	1727.93	1719.88
YBR201W	25.9086	25.9808	25.319	27.5142	27.0087	21.8129	23.0591	21.7448
YGR179C	11.5619	10.5125	11.7664	11.2911	11.8768	11.5459	11.6429	10.5099
YLR189C	8.16929	8.53924	8.41639	9.03899	8.28788	7.62472	7.27665	7.84804
YPR086W	48.0633	46.8086	48.5945	48.4652	53.1766	51.0331	46.6961	49.7514
YCR065W	22.0764	20.1042	20.4168	20.9132	17.551	16.3965	17.5949	16.6901
YFR007W	11.6408	13.0253	12.6759	10.9785	12.3447	11.7307	11.4753	12.0395
YOR348C	1.71874	1.65329	1.72506	1.22664	0	1.05662	0	1.06031
Q0182	0	0	0	0	0	0	0	0
YKL107W	1.71529	1.88667	2.08813	2.24481	1.86102	1.52895	1.62275	1.80893
YOR352W	18.8186	21.0614	20.1597	22.4563	25.6849	18.782	18.6888	18.7811
YKL115C	2.72021	3.0198	2.97159	2.7755	2.77766	2.72225	1.84285	3.29176
YPL278C	7.96646	6.70046	6.85698	6.52536	8.20132	9.30534	8.22118	9.24229
YCR024C	8.25419	8.53035	8.92105	8.70062	8.61083	8.50535	8.13068	8.63974
YBR258C	23.8801	27.1126	31.6292	30.3078	36.254	33.4935	32.9462	34.793
YER134C	59.2793	70.3568	60.943	65.524	68.1872	52.9426	51.0781	52.8587
YOR327C	240.948	254.546	244.925	258.64	271.215	231.854	246.564	252.986
YGL260W	0	0	0	0	0	0	0	0
YEL037C	107.394	111.949	113.872	115.314	145.478	115.995	116.006	124.449
YHR103W	17.7858	17.0603	17.8999	16.9933	15.0572	16.5566	14.7103	14.0263
YHR201C	42.6673	45.6668	42.3806	45.1995	51.1604	44.9588	47.0591	44.0995
YBR094W	11.4633	11.475	11.4744	11.1292	12.5904	10.2267	10.2563	10.1532
YLR031W	6.55049	5.32211	5.18192	5.08095	3.30421	6.06893	5.68191	5.62866
YNR048W	9.82776	10.2464	9.28399	10.5805	10.069	9.71485	10.7964	9.90156
YNL138W	115.592	126.264	117.483	120.955	134.08	120.109	126.692	132.227
YPL205C	9.29229	10.0714	9.14477	8.86216	9.27986	8.91733	7.20538	8.46909
YER175W-A	38.233	32.5855	30.3293	37.771	37.9613	35.2698	33.2409	32.4021
Q0085	0	0	0	0	0	0	0	0
YOR391C	0	0	0	0	0	0	0	0
YOR050C	13.2532	14.5789	16.6414	18.4444	14.9126	13.4871	13.3222	12.4184
YNR050C	58.2942	62.5786	58.2378	60.3149	75.6213	71.5414	76.78	80.6853
YLR342W-A	33.5184	27.0384	23.3517	17.1141	22.1668	18.1485	18.1114	16.8584
YDR433W	157.87	157.938	180.136	174.873	186.092	199.88	183.405	208.718
YPL242C	7.92443	8.10032	7.95401	8.03783	7.4041	7.34565	7.16332	7.2187
YNL179C	6.71196	9.27474	9.12672	7.68303	10.3042	8.70326	8.10377	8.70281
YMR226C	199.087	219.757	195.652	196.154	236.792	212.818	216.725	239.711
YGR199W	9.42192	9.14773	9.00277	8.56133	9.37622	9.73566	9.47666	9.20729
YJL096W	94.6614	96.6157	91.6658	93.3874	99.5778	89.4243	90.0317	95.1958
YJL026W	181.659	191.536	174.003	179.295	203.06	212.505	229.654	233.165
YHR191C	38.9636	39.4069	43.6449	41.1926	42.0561	39.1178	40.0479	40.4368
YJR101W	43.5762	40.7761	40.0479	41.6201	40.2671	38.3988	37.2528	37.8235
YLR168C	29.0025	32.9573	33.0224	34.2524	32.4429	40.2538	38.0453	43.7069
YPR182W	240.449	239.974	235.556	247.334	267.83	255.557	252.389	255.619
YGR247W	23.0792	23.6991	21.0105	21.1864	26.2986	16.6074	16.0444	17.2314
YGL262W	0	0	0	0	0	0	0	0
YKL211C	41.368	44.2777	41.0095	42.9222	55.3022	40.5291	43.3395	44.03
YPL209C	4.88348	5.38467	5.89612	5.21257	5.98139	5.55622	5.43485	4.72909
YOR314W	5.95988	5.22932	4.66306	4.69189	3.94538	6.79497	5.15839	3.33906
YHL040C	8.03681	6.69097	6.70049	6.47987	5.96734	6.44629	6.12099	6.48876
YOL084W	1.00597	0	1.09923	1.11703	0	0	0	0
YDR079W	89.5956	101.805	94.8425	110.186	114.673	105.733	99.6401	103.445
YDR345C	183.874	154.235	157.78	144.058	156.362	158.325	159.188	145.654
YGL241W	7.12176	6.88012	6.89935	6.87354	6.89871	6.92935	6.48042	6.40695
YHR004C	13.2493	13.742	13.8777	13.5395	13.7262	12.5809	12.6265	12.3059
YBR283C	74.0038	72.2324	69.1565	69.9021	81.2801	68.7312	74.0886	67.7888
YGR154C	3.80254	4.29057	4.00478	3.592	4.02259	4.11115	3.52661	3.43164
YOR018W	5.50683	5.63942	5.65427	5.90874	4.91341	4.34096	4.2642	4.52515
YLR002C	25.3397	25.2501	22.6709	25.536	29.6634	22.1613	22.985	24.2137
YPL007C	11.9118	12.4171	11.8109	11.7681	12.6864	11.9145	12.0573	11.808
YPR187W	314.828	312.711	311.796	313.073	363.392	306.471	315.184	326.121
YHR017W	18.8986	18.8174	18.2684	18.9606	20.4275	19.5143	19.6872	17.4896
YNL300W	1031.11	938.761	1012.11	1048.73	865.933	936.922	917.274	889.034
YDR262W	44.031	42.1843	42.4561	43.5018	39.3436	38.5813	36.8035	35.0444
YDL126C	112.964	114.628	109.001	113.55	126.447	110.191	112.098	116.673
YMR271C	11.8538	12.6488	12.8701	13.4256	10.6155	10.2078	8.69234	10.2081
YML117W	17.9255	18.5436	19.3555	18.8565	17.3053	15.8786	16.0295	16.0859
YBL009W	14.9281	15.3566	14.1477	15.1604	16.652	14.4549	15.9307	14.2224
YNL128W	1.15865	1.42348	1.54019	1.25303	1.60433	1.48009	1.37344	1.28758
YER049W	49.0898	47.5544	47.1299	46.1773	53.0934	47.5804	45.4951	47.0616
YGR212W	5.79725	5.8501	5.33157	5.7654	5.41791	6.45875	6.44821	6.11832
YCL063W	21.7592	21.9187	21.8172	20.9988	23.4427	18.0335	19.0233	18.8706
YLR127C	6.27658	6.82794	6.34682	6.97566	6.75077	7.0135	6.59567	7.21393
YDR315C	14.065	14.9279	15.3029	16.0692	14.9416	12.2356	13.2355	13.2343
YMR055C	10.5117	11.3252	10.7649	11.7254	11.3967	12.9098	12.3989	12.3324
YBL052C	10.5732	9.578	10.2079	9.64076	8.95316	9.55464	8.73879	8.19017
YCR038C	4.61938	4.22447	3.61626	4.34483	3.83084	3.68346	3.7234	3.20368
YGL201C	9.12806	8.94291	8.99106	8.89945	9.13786	8.69439	8.51503	8.83294
YOR374W	33.0511	33.8455	32.633	29.3931	26.9128	28.2785	28.5035	30.7812
YPR063C	350.891	366.761	355.62	386.259	443.484	373.86	376.618	380.152
YJR058C	62.7898	64.1895	66.4424	74.1081	71.5351	64.2198	65.1657	64.2195
YOR034C	6.57319	5.71918	5.5064	6.18779	5.54849	5.98126	5.26263	5.40767
YGR035C	33.079	29.4085	26.863	33.6651	53.2095	40.401	40.9589	38.8036
YOL118C	17.0187	15.1567	16.851	15.8488	17.3489	11.0398	15.612	12.8942
YBL085W	16.278	14.6469	15.3191	14.9472	14.067	13.4573	14.4652	13.4233
YDR126W	6.14965	7.09478	6.86425	6.23388	8.24752	6.74069	6.72723	6.77078
YIL049W	12.9442	12.8154	13.3099	12.5096	13.741	13.508	11.6984	11.5124
YNL277W-A	3.0327	3.0307	5.62791	6.43313	1.72858	3.00016	2.95922	3.416
YEL024W	98.2293	97.2561	98.5524	100.357	92.3731	103.724	103.238	102.379
YIL014C-A	97.7997	99.8535	102.354	102.796	118.407	254.07	260.577	273.106
YBL113W-A	0	0	0	0	0	0	0	0
YDR067C	28.6729	28.6466	29.5334	29.9033	29.5491	28.4	28.4655	26.7923
YEL027W	974.633	935.358	858.932	935.966	1105.17	967.269	1069.88	1050.17
YGL116W	12.0224	12.015	12.258	10.7831	13.5203	12.199	11.2586	12.5155
YMR214W	29.6205	28.1102	27.2257	30.1873	36.5749	29.7912	35.8259	34.2783
YGR080W	46.3232	52.9959	49.3571	53.0053	57.1923	46.5084	49.6706	51.4935
YDR048C	1.81296	3.98867	1.94337	2.22443	3.72331	2.73361	2.83199	2.60244
YDL060W	23.6757	21.7012	22.41	20.6474	22.3702	20.4081	19.2755	18.9671
YKL190W	146.746	162.985	151.63	166.595	175.16	150.696	142.017	152.075
YPL126W	36.6175	34.2373	34.2206	33.4189	39.187	30.8475	31.8661	32.538
YOR012W	13.5709	14.8179	14.0739	14.331	12.1241	18.066	14.3738	15.0641
YLL006W-A	0	0	0	0	0	0	0	0
YHR192W	23.6744	27.086	25.6444	26.3184	31.9887	28.1217	30.0908	26.2677
YDR255C	6.49328	6.27143	7.2801	7.0208	6.29085	6.1533	6.07019	6.15838
YFR050C	179.782	194.191	184.261	193.66	239.985	183.836	192.781	198.081
YLR248W	35.9088	38.0811	35.2943	37.8783	40.561	34.2249	36.7168	34.6396
YDR031W	60.3227	62.5013	66.7551	69.324	59.9134	67.0061	57.5846	66.0934
YDR138W	9.04754	8.38219	8.63505	8.83805	8.90261	8.06568	8.40851	8.54617
YLR349W	9.78765	9.39584	9.3745	8.63082	8.23395	10.4048	12.0357	12.9414
YBL108W	0	0	0	0	0	0	0	0
YKL204W	28.3886	27.713	30.0916	28.5073	31.266	26.7793	27.8672	27.9704
YDR070C	145.727	138.334	171.372	143.908	30.9367	41.6098	39.2115	37.6386
YOL054W	12.8801	11.9249	12.6981	12.5014	15.1935	12.2078	12.9799	12.7139
YPL171C	1.40669	1.47042	1.16276	1.39771	1.25418	1.10816	0	1.22112
YJR017C	205.654	224.405	205.107	223.71	240.124	211.952	229.111	237.887
YPL132W	22.6319	22.5085	21.8251	22.4677	24.0968	23.0135	24.0385	23.9924
YBR275C	7.12388	6.83176	7.17037	6.75753	6.52279	6.54777	5.8663	6.03158
YOR053W	16.4242	14.5532	16.8018	14.7815	13.6287	13.501	18.3096	11.3967
YPL143W	4346.14	4114.9	4525.43	4684.63	4441.66	4625.58	4483.26	4396.24
YCR015C	10.4137	11.894	11.8394	12.5073	14.9241	10.9568	12.3606	11.9906
YOR198C	159.245	160.777	159.251	160.386	180.172	165.643	172.705	179.548
YDR399W	244.904	196.486	215.896	167.436	152.845	201.101	174.146	136.527
YKL017C	7.58418	7.28609	7.37696	6.76671	7.22887	6.7698	6.8016	6.94374
YKR064W	8.08796	7.83744	8.23889	8.27878	8.20308	8.41622	7.59175	8.1808
YIL055C	3.25505	2.95648	3.4592	2.69328	2.22462	2.35299	2.37938	1.97563
YOR287C	19.1376	19.7795	20.2255	19.508	24.1198	21.339	19.3315	19.644
YDR494W	30.2125	29.9871	34.1433	33.6457	37.972	34.6853	33.52	35.166
YER073W	54.4843	53.084	49.7788	50.1013	56.2335	46.5428	44.4915	40.2856
YNL069C	2386.33	2369.01	2343.6	2187.07	2283.16	2283.91	2287.48	2160.68
YNL111C	169.06	178.497	194.658	202.237	219.511	274.363	274.882	269.653
YCL049C	14.4116	14.3989	13.8117	14.1014	15.6897	20.3653	20.066	17.8251
YBR133C	12.4387	11.0686	11.4042	9.94772	8.54303	9.50886	8.61403	7.21421
YPR040W	24.6979	25.7434	24.7696	25.0052	30.5494	26.4634	25.8677	28.0867
YPL253C	5.89585	5.72813	5.69743	5.65413	5.24495	5.73451	5.63768	5.52958
YNL166C	35.4139	38.0533	37.5915	35.9574	38.8266	37.321	37.9741	37.6033
YPR021C	10.5156	10.7606	11.126	10.5121	9.5279	10.0796	10.0425	9.89341
YPL207W	16.8758	16.2198	16.3839	16.9901	16.8375	15.764	16.6856	16.4589
YJR068W	38.8967	40.0078	38.2596	39.7576	47.2247	37.0251	38.9697	37.3277
YER075C	8.86207	7.30963	7.94016	7.35077	6.56527	6.67192	6.9647	5.96031
YNR057C	10.5801	9.73748	9.78688	9.36421	8.56453	8.06312	8.26758	7.17234
YFR019W	8.96819	9.14133	9.59786	9.12245	8.52546	8.73647	8.40286	8.99623
YHR040W	18.9329	19.846	18.8219	18.9932	21.1037	16.5245	15.6606	17.2622
YFL042C	9.86682	10.6961	10.2334	10.8426	10.9912	9.9742	8.98015	8.98628
YMR223W	10.7623	10.2258	10.823	10.4185	11.5366	9.72671	9.67587	9.75662
YEL031W	26.1146	25.2434	24.4104	24.4165	25.7187	24.6093	24.5553	25.1556
YDR368W	110.804	118.763	115.202	121.535	127.159	128.579	137.215	145.779
YNL067W-B	0	2.69708	0	1.65121	0	2.54207	2.59427	0
YLR295C	335.317	363.167	359.061	364.263	382.967	326.294	346.459	377.709
YLR307C-A	3.18028	4.45645	3.14577	3.6802	7.22994	9.58645	10.7828	9.22265
YCR101C	3.6245	3.43488	4.51484	4.37002	4.63752	2.02135	2.04876	2.00124
YML007C-A	6.90525	11.9309	16.1622	10.3509	4.95385	9.91113	14.9875	6.51543
YMR256C	1203.29	1275.01	1206.22	1308.06	1174.23	1394.36	1345.37	1458.99
YKL192C	609.575	587.147	568.59	620.934	675.449	613.976	610.951	647.659
YFR042W	31.198	32.3128	29.6777	31.0153	35.8559	34.3752	34.4456	36.3864
YOL139C	569.957	607.345	592.87	590.456	680.261	594.055	596.479	599.567
YBR173C	241.753	239.64	247.999	271.606	317.011	259.315	285.404	291.519
YNL242W	2.94054	3.08133	2.76537	3.06915	2.84665	3.37544	3.13386	3.26992
YDR192C	14.698	15.5211	14.8808	15.56	18.9269	13.8454	15.313	15.7018
YJL140W	124.628	133.292	136.532	136.609	147.154	138.867	131.207	127.542
YBR170C	17.6333	18.3742	17.706	17.8666	20.4633	16.0864	17.3919	18.2461
YCR024C-B	779.814	726.193	679.166	738.758	661.449	723.505	688.407	643.147
YBR184W	4.07	3.90412	3.68198	4.06809	3.43716	4.36591	4.27362	4.06434
YBR203W	1.68038	1.66585	1.73059	1.79563	1.74562	1.63958	1.49433	1.49112
YFL005W	178.047	187.916	195.962	195.522	237.692	195.31	195.381	197.684
YNL292W	25.5744	27.9321	26.185	26.6736	31.9819	25.6591	26.5108	28.2575
YDR251W	18.3064	17.9444	18.5636	18.5213	17.2989	15.9093	16.7072	16.5253
YPL201C	0	0	0	0	0	0	0	0
YIR013C	1.66475	1.82696	1.29084	1.22614	1.0647	0	0	1.11081
YHR063W-A	75.2396	69.1118	71.793	70.6011	81.9156	87.8674	76.8233	75.6468
YLR284C	7.97738	9.97299	8.58716	8.83072	8.84102	8.5327	6.99641	7.89197
YNL266W	30.5524	32.3987	34.556	29.6101	37.6659	38.2837	30.2741	32.2033
YIL043C	252.56	267.832	257.138	271.482	314.158	300.738	321.302	340.949
YBR249C	156.567	155.852	152.345	138.73	158.496	137.075	135.53	123.227
YAR060C	3.91835	3.77903	4.16649	4.57226	3.28461	2.99557	3.25513	2.82425
YMR251W	1.58525	1.32792	1.34686	1.81047	1.12864	0	0	0
YBR265W	71.0479	74.947	66.8405	69.5294	74.558	67.8182	72.4941	67.4051
YGL071W	13.2459	12.8174	12.7602	12.5181	12.8706	11.7195	12.6094	11.6869
YGL144C	4.57577	4.98859	4.74574	4.18523	4.11739	4.6165	3.85052	4.44174
YPL188W	18.8966	19.1772	19.2738	18.6386	23.0036	18.3176	19.1809	19.4936
YGL023C	23.0791	23.3767	22.7624	24.2547	26.394	21.849	22.5805	22.5062
YIL071W-A	9.33892	12.1245	12.8021	11.0079	9.88789	12.2869	10.3517	10.6378
YIL130W	15.2748	14.8775	14.9757	14.8113	14.1693	12.9563	13.1837	13.0639
YER023C-A	0	0	0	0	0	0	0	0
Q0050	0	0	0	0	0	0	0	0
YFL017W-A	212.87	205.556	213.275	203.379	235.081	208.013	196.887	218.292
YJR024C	72.8526	77.9313	75.5163	82.5481	85.1488	69.4894	68.7897	73.6783
YLL019C	9.87621	9.55299	9.75402	9.52714	8.51594	7.79217	7.63077	8.06535
YNL339W-A	10.6937	9.17082	10.8076	9.20997	15.2029	10.8304	9.25932	10.6768
YLR138W	9.91486	9.69363	9.89698	9.56793	9.66049	9.69041	10.2348	9.38982
YNR066C	2.27553	2.43337	2.09761	2.3975	2.24836	2.40384	2.24902	2.20314
YHR178W	4.96975	5.06073	4.95399	5.12535	5.65317	5.34361	5.37711	5.02049
YJR151C	2.08691	1.92299	1.89344	1.78579	1.47935	1.24733	1.17025	1.20479
YGR015C	12.203	12.1859	11.5132	12.2791	12.937	12.3477	11.7787	11.6777
YGR138C	69.9939	62.7122	64.33	54.7515	33.9138	75.2589	61.87	50.6218
YKL162C	3.92158	4.28756	5.24663	4.46652	4.5871	3.94454	3.87679	3.3076
YBL079W	14.5963	14.1881	14.1999	13.7704	13.4223	12.1726	12.5118	12.5869
YER046W	13.4173	12.4002	13.7942	12.5086	12.821	11.0631	12.8046	10.8695
YMR042W	29.5815	31.6649	31.749	30.8129	37.1149	35.3994	34.55	30.1384
YDL185W	79.5592	76.8937	77.4957	77.1911	73.5293	71.8262	75.0996	77.0282
YJR032W	32.4068	32.7418	35.0572	36.5786	40.9494	33.9484	34.3736	34.6788
YDL158C	30.182	34.9036	30.096	30.6909	39.3222	30.5645	36.575	28.9484
YBR104W	20.8979	20.9589	19.9781	19.7083	22.6859	19.2989	19.6142	19.071
YFL031W	309.376	292.139	292.292	315.464	244.678	319.761	286.824	290.454
YHL033C	536.243	461.129	479.848	392.306	347.957	577.946	528.09	451.315
YAL067W-A	0	0	0	0	1.10409	0	0	0
YHR066W	30.1298	28.9324	29.5133	29.546	37.5735	26.6666	26.706	29.3363
YCR085W	3.7735	3.08468	2.06776	2.12202	1.86234	3.07571	2.66925	1.68358
YKL156W	3298.61	3114.39	3275.81	3118.68	2609.82	3147.32	2845.47	2633.86
YDR241W	31.4829	29.429	34.6585	35.0257	33.5456	40.615	37.0036	35.4066
YHR029C	21.0474	22.79	21.6639	21.01	28.5409	26.4273	26.2055	28.5108
YIL138C	182.068	187.669	199.585	207.296	214.731	256.9	238.451	238.861
YOL055C	7.95696	6.92982	7.68268	7.21838	7.47021	7.21675	6.67459	6.78658
YGL236C	8.79452	7.64583	7.85792	7.54446	6.5146	6.86487	6.14016	5.67808
YAL049C	65.1862	75.3662	68.9476	70.9107	76.9002	60.5738	62.964	64.3592
YNR009W	35.9535	32.9034	34.856	33.3966	31.2471	28.4719	28.6299	29.0538
YBR048W	2154.3	2080.22	2099.54	2132.2	2121.26	2146.06	2178.48	2132.07
YER102W	1343.45	1314.03	1327.72	1268.83	1252.84	1339.71	1304.68	1196.13
YJL177W	1352.65	1303.98	1336.9	1264.49	1308.1	1382.15	1322.26	1300.61
YDR146C	19.6859	18.4203	19.4115	17.8845	19.0916	18.8569	18.3652	19.2194
YIL154C	50.0725	48.8633	49.8084	53.4682	57.287	49.56	49.3596	51.9607
YJL131C	13.3648	14.7159	14.7489	14.9233	15.7752	15.1836	15.4642	15.1344
YKL056C	1898.72	1959.26	1872.81	1948.55	2169.86	1969.25	2047.75	2136.85
YPL069C	14.8587	15.7437	15.7214	15.4752	17.8966	15.6384	16.0727	15.3009
YHR073C-B	0	0	0	0	0	0	0	0
YOR180C	6.1889	6.09759	6.41367	7.32374	4.89287	5.35304	4.72947	4.04623
YMR078C	13.3266	12.8591	13.4812	13.6887	13.1876	12.6284	12.5663	12.0052
YDL202W	47.8787	50.9511	49.4169	51.5825	57.4781	49.75	53.3022	53.5969
YBR032W	4.25837	3.13246	3.13553	2.55026	2.15753	2.3649	3.31581	2.64517
YBR273C	23.0617	25.6758	24.1915	26.833	28.0392	22.7554	22.4626	25.3224
YER005W	16.2934	16.474	16.4991	16.4442	17.1891	16.5682	15.7356	16.4147
YDL192W	688.888	700.453	691.685	726.003	747.486	765.876	738.393	725.643
YLR281C	9.50656	6.70108	9.03476	8.68893	8.21396	10.4728	10.1153	9.90872
YOR394C-A	4.06908	5.16778	2.12015	3.70596	1.72013	2.23725	2.26189	1.72047
YDR308C	93.5955	103.858	110.686	111.654	115.411	112.602	114.086	110.439
YDR484W	8.34625	8.32132	7.86516	8.48817	8.92319	8.3066	8.39006	7.74471
YLR385C	7.92031	7.98795	9.28891	5.78067	7.68551	5.04781	4.90454	6.0052
YML120C	36.6692	37.9008	36.2338	37.4978	35.5041	36.5628	37.3193	36.6729
YEL073C	16.9623	16.4438	16.7888	15.5172	15.0579	18.193	17.7782	17.3665
YDL178W	27.4192	30.1031	26.8992	27.7835	34.3243	31.6126	34.1103	32.9869
YLR136C	10.713	12.0132	12.3956	12.9938	13.1895	12.6056	13.6701	13.8778
YNL100W	60.7146	59.9241	60.216	59.8339	59.2989	61.7407	58.7672	60.9533
YKR008W	22.6937	23.3558	22.7342	22.1326	23.6772	22.6611	21.9926	21.6008
YML118W	2.37064	2.36149	2.42812	2.30072	2.06422	2.4891	2.19582	2.19129
YDR106W	1.09366	0	1.29475	0	1.06302	0	0	0
YLR406C	1578.4	1433.41	1550.71	1382.29	1377.32	1586.71	1466.03	1342.15
YDR330W	18.8865	20.5052	19.5444	19.8073	21.8326	18.6608	18.863	20.8414
YOR279C	9.0734	9.08153	9.34715	9.08648	10.083	10.329	9.86415	10.4526
YIL125W	28.2426	27.6732	27.9597	28.5437	26.581	27.1724	26.3022	29.4848
YEL032C-A	0	0	0	0	0	0	0	0
YER167W	11.3171	11.439	11.8189	11.5039	10.5099	9.83136	10.7616	9.80056
YML031W	18.2563	18.1575	16.4685	17.5591	19.7667	17.0226	18.5863	17.722
YDR179W-A	11.1705	10.0471	10.477	11.0096	10.2568	12.0627	11.453	10.2622
YOL008W	29.4746	33.1078	29.1654	30.146	36.1652	29.7493	31.689	33.9043
YBR278W	21.9051	21.2116	23.4697	22.7612	19.2934	22.6804	23.884	21.6398
YNL326C	12.8401	14.1289	12.3253	12.1691	13.5865	13.5	14.0987	12.9553
YDR213W	5.72288	5.88688	5.91982	5.72724	6.08187	6.20364	6.28342	6.54568
YMR087W	7.68045	8.78834	8.54536	7.68894	7.41639	6.96654	7.29002	6.75983
YOR111W	22.8207	19.9635	21.7868	22.5403	22.6347	20.6709	21.6872	21.37
YGL257C	21.3499	20.549	20.6257	22.5108	24.16	19.6783	21.4782	20.2342
YMR220W	39.0608	43.4399	41.9636	41.7489	42.5781	40.2192	41.9717	41.648
YBR154C	138.595	145.298	139.671	141.992	162.471	150.061	152.973	149.169
YBR191W-A	60.8733	65.5203	68.3352	64.9847	49.2177	48.5198	42.0843	46.7969
YIR017C	5.2307	4.98072	6.46157	6.15931	6.73684	5.05427	5.04051	6.275
YHL028W	25.828	24.0202	27.3059	24.0727	22.7107	21.9542	25.6292	22.0378
YOR015W	29.0662	32.8873	34.6708	31.1166	33.1222	30.5292	34.4483	32.4555
YFR012W-A	12.8229	8.84066	4.98621	10.2036	10.331	6.78035	9.10049	9.45961
YHL050W-A	0	1.27942	0	0	0	0	0	0
YGR060W	178.457	180.424	159.035	168.111	212.732	205.872	229.145	233.436
YGL206C	13.9032	13.8451	13.6305	13.4799	13.1366	11.9937	12.4084	13.2216
YOR321W	7.00494	6.91676	6.25941	7.03543	7.93131	6.71399	7.37356	6.83287
YHR081W	57.8712	61.4791	65.4508	63.2112	78.9661	74.1406	61.6342	62.7219
YDR281C	24.9214	21.4908	17.7078	19.5987	21.5166	36.6778	37.6784	35.617
YER083C	81.0028	87.7062	77.9821	87.3961	105.639	87.6883	91.8987	93.8972
YPL030W	16.2211	17.5334	15.1365	15.854	16.6111	15.3325	15.4034	14.5794
YHR071C-A	14.4252	14.6396	17.1672	16.1973	14.8524	21.0183	17.9507	18.9881
YPR162C	12.2839	12.5858	12.4437	12.0334	13.8706	12.8837	12.2575	11.3529
YPL283W-B	0	0	0	0	0	0	0	0
YMR138W	18.2014	20.3072	19.4272	19.9738	23.7104	16.8921	16.4761	20.0752
YNL215W	22.6885	21.9813	22.4281	25.6265	25.1069	22.3229	23.8019	23.2931
YMR053C	1.46878	1.65611	1.54414	1.82041	1.54233	1.47786	1.35665	1.41853
YMR122W-A	3961.33	3914.61	3653.2	4073.46	3215.33	4757.29	4526.2	4490.3
YLR118C	67.0364	75.181	71.9064	74.2691	80.6237	75.9464	77.4961	79.1769
YEL030W	4.82104	4.80428	4.90924	4.72221	4.38405	4.53301	4.35212	3.97076
YFR038W	10.5362	10.6613	10.4768	10.8363	11.4077	9.12387	8.93649	9.84656
YMR041C	11.0586	13.2076	12.3145	11.316	12.2977	17.7446	15.8825	16.5348
YGR058W	22.1573	22.0939	20.9936	20.5149	23.3356	20.7455	20.7328	22.2489
YER153C	14.087	14.8959	14.2501	13.2525	11.7146	11.6113	10.6795	10.7961
YGL195W	16.8588	16.1735	16.3061	15.3117	14.4606	14.4739	14.2608	14.5075
YER137W-A	5.45444	6.44538	4.04813	4.18043	5.25378	6.91401	8.22017	5.84768
YNL225C	6.2883	5.87977	6.66884	5.77588	6.66907	6.20327	6.22473	5.32293
YPR074W-A	0	1.10506	0	0	0	0	0	0
YMR029C	17.1884	18.5655	17.7293	19.2906	20.1772	17.2672	17.5966	18.6737
YMR092C	37.0328	40.1987	36.8827	39.1106	43.4296	34.3832	35.917	38.0182
YER113C	10.8105	10.0419	10.4196	10.1013	10.766	10.7172	10.9246	10.7982
YIL052C	2397.93	2236.34	2333.19	2283.46	2372.7	2421.11	2348.72	2281.1
YHL038C	8.28997	8.59974	8.4347	9.07968	10.5604	7.8337	8.5724	8.41918
YGL192W	11.1588	10.3499	10.4088	9.72579	9.34022	9.81619	10.392	9.24653
YIL078W	168.66	175.323	164.947	166.008	201.553	171.814	174.31	176.838
YLR036C	30.6237	32.8798	34.4483	37.5857	46.3004	36.6787	39.324	39.0741
YOL057W	33.3979	36.794	33.4224	35.8116	39.1184	31.9784	33.5451	35.0891
YPL104W	9.66137	9.58448	9.2296	10.0017	10.439	18.6905	19.6779	20.4779
YFR020W	13.5549	11.8071	11.8865	12.8538	12.8643	15.9827	14.4374	12.9581
YLL009C	500.84	515.63	561.09	580.839	555.158	614.486	556.798	674.916
YNR044W	15.2034	12.1696	13.4931	12.8376	16.5145	16.7202	18.6905	18.4504
YLL035W	12.3528	12.1455	12.4812	12.1746	13.5417	11.7484	11.5483	11.075
YOL157C	1.62174	1.97214	1.94229	1.96101	2.29827	0	0	0
YBL045C	155.143	161.84	163.564	159.709	159.328	165.156	165.831	168.032
YKL101W	20.1982	18.8894	20.192	19.0462	16.0821	15.6851	15.496	14.865
YMR291W	15.4602	13.4931	15.7761	12.5144	9.13938	14.9987	13.4563	11.169
YLR426W	15.4604	17.2126	16.8622	15.6343	15.8931	15.3186	15.7677	15.4619
YOR347C	10.5639	12.0534	10.1539	12.6703	14.319	16.0117	16.3557	18.1843
YOR143C	22.0303	22.133	24.1174	23.6158	23.8031	22.928	21.408	22.4368
YGR259C	18.3665	21.3011	19.825	18.8007	30.0207	67.8817	77.3115	58.775
YMR023C	4.60588	4.5666	4.2453	4.47578	4.10222	4.39145	3.74679	3.78327
YLL049W	39.0577	39.7013	37.5593	36.6632	34.77	40.757	39.788	37.2675
YBL029W	15.756	15.3503	15.2736	14.5109	16.1369	19.9901	19.9167	18.4289
YNR059W	7.79973	7.1756	6.95947	6.81651	6.41106	5.81786	5.92951	5.04638
YGR071C	7.37993	7.0357	6.86722	6.81355	6.4283	6.66333	6.34509	5.78151
YOL058W	18.5592	17.2181	18.2232	15.6827	15.9235	15.6884	14.2521	15.2886
YEL015W	29.8275	29.4742	30.7938	29.7179	33.7928	27.3763	28.0648	27.3142
YDR279W	20.5976	20.273	20.2888	20.8817	23.7974	18.8075	20.5837	19.7343
YNL235C	5.02612	6.37298	4.27363	5.22939	7.15954	3.85639	6.13062	3.63122
YKR035C	55.7735	59.9508	57.7382	61.1549	63.1447	56.4962	60.1629	63.1786
YKR081C	70.1	68.4731	71.3614	70.0567	83.5843	70.239	66.6089	71.2709
YBR221C	231.609	246.284	230.484	240.726	280.439	244.914	249.343	261.042
YJR143C	29.2418	29.2061	27.5934	28.4329	30.6601	28.5944	30.655	30.1446
YPR078C	0	0	0	0	0	0	0	0
YDL173W	75.6096	82.9036	79.5572	81.9336	93.2918	76.3634	80.515	82.8912
YBR123C	8.75568	9.53495	8.7139	8.66682	8.89401	9.60885	9.16168	8.79611
YJR073C	122.06	134.626	123.305	138.338	108.973	65.2244	69.7283	75.0648
YOR362C	150.034	155.83	150.226	156.502	192.861	159.088	161.04	168.846
YOR249C	5.62837	5.74657	6.47297	6.53539	6.42693	7.06148	6.59031	6.63387
YKL185W	29.2325	26.4542	27.331	24.3296	23.9768	28.0296	30.2164	26.4413
YIL091C	17.0966	16.4835	16.5988	16.4822	17.5719	15.5311	14.8015	14.7779
YFL040W	1.69444	1.49641	1.3659	1.52815	1.56054	1.79901	1.90385	1.51348
YKL080W	197.46	213.676	205.224	214.118	242.089	213.33	218.978	225.655
YLR087C	3.21449	3.09888	3.16685	3.08126	2.7861	2.71	2.72898	2.89119
YIL073C	2.69245	2.94069	2.80777	2.71632	2.72417	2.68445	2.26093	2.39568
YIL034C	156.113	169.205	163.753	178.439	189.061	175.767	181.236	179.85
YDR522C	1.13786	1.27648	0	0	1.11919	0	0	0
YKL093W	11.4103	12.1944	12.0198	11.073	10.3627	11.1646	10.4569	11.4464
YDR400W	26.9801	27.5861	26.3423	28.554	30.0118	27.6803	27.1104	28.6038
YJL211C	14.3633	16.0387	13.6561	13.6858	12.2308	13.4871	12.7782	13.9738
YAR008W	22.2799	22.6435	22.1847	22.9222	24.9199	21.4291	20.9323	21.8727
YJL225C	13.1106	10.512	12.2683	12.1437	12.0333	5.97827	5.78328	8.18663
YFR010W	47.0891	50.8206	50.3821	49.9978	62.8384	48.7947	49.028	51.4662
YMR258C	9.60636	9.75824	8.9174	9.61873	10.1026	9.1116	9.06512	8.44039
YOR013W	14.6819	13.0252	14.5316	14.4764	13.5303	17.756	16.9448	15.1615
YCR045C	11.3636	10.8092	9.92684	10.2161	9.51451	9.84075	9.09813	8.71352
YJL007C	1.88595	1.44146	1.0047	0	0	1.78295	2.02981	1.78085
YDL141W	17.3707	17.3201	16.8803	16.8531	19.1258	16.235	15.115	16.0604
YIR041W	0	0	0	0	0	0	0	0
YHR008C	352.991	372.521	371.885	395.453	378.507	368.079	383.874	417.275
YJL122W	120.475	120.987	121.809	119.262	122.742	124.237	114.078	113.228
YKL152C	4002.94	4293.61	4095.36	4178.05	4639.67	3795.22	4015.73	4088.51
YLR137W	9.78491	9.1195	10.229	9.1554	9.92733	9.59861	8.22021	8.10217
YOR123C	38.1848	40.7455	40.8402	40.4294	43.9295	41.78	39.9393	37.6823
YHR032W	19.2625	17.6499	17.3251	17.5699	19.4454	17.0711	16.7939	17.2625
YDL105W	10.0129	10.8326	11.2841	10.3671	13.058	9.97298	10.5661	10.12
YPL096W	14.4852	15.8572	16.4304	15.7675	18.3686	14.4339	14.7011	14.8609
YOL052C-A	875.804	883.179	947.26	892.6	247.6	407.955	360.957	434.84
YDR318W	11.9354	11.7637	12.3964	12.0217	12.6703	12.4513	12.1707	11.9607
YIL037C	2.19079	1.85867	2.18363	2.03591	2.12395	4.16949	3.83329	3.07568
YDR481C	17.5578	18.7579	17.8069	18.1327	21.3388	20.2785	21.653	20.7431
YIL142W	85.4228	86.7795	82.5269	80.9532	101.532	81.2937	85.3209	85.3343
YJL198W	13.2233	12.4637	12.9987	12.1878	11.461	11.6642	11.2385	10.9154
YER130C	52.1903	44.8398	48.2366	42.9666	35.5724	42.22	37.9797	36.4025
YNL222W	19.9219	23.9067	24.1001	23.2152	27.3304	21.1979	20.7639	21.2843
YNL260C	26.7607	28.1286	30.447	31.856	30.3676	32.7542	31.5372	34.3262
YNL156C	42.4151	45.632	44.0819	45.8272	47.8939	49.3106	47.5597	48.6975
YKL197C	5.51573	5.3212	5.59303	5.65729	4.90957	5.17192	4.71662	5.03372
YOR390W	10.5466	10.6298	10.6213	11.1874	11.4774	8.7576	9.69041	9.94101
YER138W-A	201.706	175.47	308.227	216.092	156.414	200.053	138.855	150.805
Q0120	0	0	0	0	0	0	0	0
YFL034C-A	201.36	146.384	182.538	134.141	95.8222	178.431	135.992	90.5434
YFR012W	2.8849	2.6899	3.07912	2.64584	3.3091	2.72498	2.35053	1.89261
YGL083W	9.85944	9.62474	9.75477	10.1117	10.34	10.1233	10.111	9.56636
YML084W	0	0	0	0	0	0	0	0
YOL077C	129.934	131.554	131.281	127.782	145.632	130.217	131.402	128.265
YOR291W	5.71099	5.51314	5.33901	5.88143	5.50723	5.48573	5.23096	5.40353
YMR304C-A	14.7333	18.5242	17.5411	16.0604	14.3297	14.6454	21.3348	15.5214
YNL279W	2.7878	2.66829	2.55887	2.57985	3.34806	3.18856	3.09898	2.93868
YNL281W	256.279	311.562	285.328	349.479	434.119	291.307	312.962	348.745
YLR420W	212.554	234.624	220.716	226.675	276.924	226.192	239.397	243.887
YGL198W	69.6278	73.2716	64.1659	71.8325	85.2994	68.2434	75.9168	76.4291
YCR061W	4.91939	5.32066	5.36373	5.17155	4.69254	6.6296	6.1406	6.35266
YPR145C-A	10.2204	12.9658	19.2068	14.6256	12.6093	23.123	19.0794	16.6884
YMR185W	6.38413	6.60594	6.0898	6.15149	6.21916	4.92078	5.13706	5.41449
YMR278W	17.0132	18.9189	16.3987	19.5982	20.896	23.0349	23.8161	24.8635
YML111W	13.8841	13.2998	13.749	13.1524	13.4042	12.4158	12.4576	12.312
YCR040W	0	0	0	0	0	0	0	0
YJL125C	31.4931	31.3479	29.7701	31.3812	36.3524	31.3209	30.0651	28.3639
YGL218W	10.6644	10.824	9.90486	11.7129	12.9956	9.81117	8.97615	11.6687
YPR052C	796.411	753.85	808.855	789.618	848.991	860.382	786.502	791.765
YDR390C	27.9713	28.9734	27.8511	29.2588	34.6822	27.7	28.0999	27.9874
[truncated: 4,601 more rows]
