# Supplementary material for: A prion accelerates proliferation at the expense of lifespan
Source: eLife. 2021 Sep 21;10:e60917. doi: 10.7554/eLife.60917 (PMC8455135; doi:10.7554/eLife.60917)
Supplement: Supplementary file 5. — See .csv file. [file elife-60917-supp5.csv]

chromosome	start	end	sequence	score	strand	pvalue	orf type	orf strand	orf name
chrI	34583	34600	CCCTGTTCAACTCTCCG	1403	-	3.30E-06	gene	+	YAL061W
chrI	35860	35877	AGGTGTTCAATCCCTCC	1503	+	2.54E-06	gene	+	YAL060W
chrI	139229	139246	CTGGGTTCAATTCCCAG	2124	+	5.55E-09	tRNA	+	tP(UGG)A
chrI	166314	166331	ATCGGTTCGATTCCGGT	1868	+	2.72E-07	tRNA	+	tA(UGC)A
chrI	182529	182546	GCAGGTTCGAGTCCTGC	-8243	-	8.92E-06	tRNA	-	tS(AGA)A
chrII	9641	9658	GCGAGTTCGAACCTCGC	2012	+	4.53E-08	tRNA	+	tL(UAA)B1
chrII	36463	36480	CTGTGTTCGATCCACAG	-8146	+	6.03E-06	tRNA	+	tF(GAA)B
chrII	81433	81450	ACCAGTTCAATACCGGC	1643	+	1.44E-06	gene	-	YBL076C
chrII	88937	88954	CCGGTTTCAATTCTTAG	-8209	+	7.60E-06	gene	-	YBL072C
chrII	90995	91012	GTGGGTTTGAACCCTGT	-8215	+	7.81E-06	gene	+	YBL069W
chrII	114896	114913	GCCAGTTCTATCCTCAC	1517	-	2.42E-06	gene	+	YBL056W
chrII	197542	197559	AGCGGTTCGATCCCGCT	1616	+	1.64E-06	tRNA	+	tI(AAU)B
chrII	197636	197653	CCCGGTTCGATTCCGGG	1949	-	1.09E-07	tRNA	-	tG(GCC)B
chrII	227131	227148	GCAGGTTCGAGTCCTGC	-8243	+	8.92E-06	tRNA	+	tS(AGA)B
chrII	259174	259191	CGATGTTCTACACCTAC	819	+	4.74E-06	gene	-	YBR012C
chrII	266425	266442	ATCGGTTCAAATCCGAT	1701	+	1.04E-06	tRNA	+	tT(AGU)B
chrII	279054	279071	CTGAGTTCAATTCTAGC	-8114	+	5.55E-06	gene	+	YBR020W
chrII	326799	326816	CCGAGTTCGAACCTCGG	2119	-	6.24E-09	tRNA	-	tV(UAC)B
chrII	347661	347678	GCGAGTTCGAACCTCGC	2012	+	4.53E-08	tRNA	+	tL(UAA)B2
chrII	350873	350890	CCCGGTTCGAATCCGGG	1897	+	2.02E-07	tRNA	+	tQ(UUG)B
chrII	389520	389537	ATAAGTTCTACACTGCT	1083	+	4.60E-06	ARS	.	ARS213
chrII	405924	405941	ATGGGTTCGACCCCCAT	1849	+	3.29E-07	tRNA	+	tR(UCU)B
chrII	406006	406023	CGGGGTTCAATTCCCCG	1949	+	1.09E-07	tRNA	+	tD(GUC)B
chrII	455900	455917	TGGGGTTCGAATCTTGC	-8260	-	9.74E-06	gene	+	YBR108W
chrII	501335	501352	CTAGGTTCGATACTCTT	-8185	+	6.89E-06	gene	-	YBR132C
chrII	514130	514147	GCGAGTTCGAATCATCT	-8230	-	8.38E-06	gene	-	YBR138C
chrII	541762	541779	AGAAGTTCAAATCCTGG	1635	+	1.50E-06	gene	-	YBR150C
chrII	643014	643031	CTTAGTTCGATCCTGAG	-8181	-	6.79E-06	tRNA	-	tC(GCA)B
chrII	645213	645230	CGGGGTTCGACTCCCCG	1732	+	8.43E-07	tRNA	+	tE(UUC)B
chrII	657546	657563	ATGCGTTCAAAACTCAG	-8170	-	6.52E-06	gene	-	YBR216C
chrIII	82469	82486	CGGGGTTCGACTCCCCG	1732	-	8.43E-07	tRNA	-	tE(UUC)C
chrIII	95085	95102	ACGAGTTCAATCCATAC	-8261	-	9.79E-06	gene	-	YCL016C
chrIII	102211	102228	GTGGTTTCAATTCCGCG	-8247	+	9.10E-06	gene	-	YCL011C
chrIII	123584	123601	CCGGGTTCGAGTCCCGG	-7831	-	4.75E-06	tRNA	-	tP(AGG)C
chrIII	127764	127781	GTGAGTTCAACCCTCAC	1635	+	1.50E-06	tRNA	+	tN(GUU)C
chrIII	142708	142725	CCCGGTTCGATTCCGGG	1949	-	1.09E-07	tRNA	-	tG(GCC)C
chrIII	151291	151308	AGGGGTTCGAGCCCCCT	-8164	-	6.38E-06	tRNA	-	tK(CUU)C
chrIII	168308	168325	CCCGGTTCGAATCCGGG	1897	-	2.02E-07	tRNA	-	tQ(UUG)C
chrIII	181350	181367	CTAAGTTCAATTCCAAT	-8244	+	8.97E-06	gene	+	YCR032W
chrIII	228017	228034	GCTGGTTCAAATCCTGC	-8210	+	7.63E-06	tRNA	+	tS(CGA)C
chrIII	236211	236228	GCCAGTTCAATTCCTCG	1700	-	1.04E-06	gene	-	YCR067C
chrIII	280133	280150	CTGTGTTCAAATCACGG	-8177	-	6.69E-06	gene	+	YCR093W
chrIII	295531	295548	ATCGGTTCAAATCCGAT	1701	+	1.04E-06	tRNA	+	tT(AGU)C
chrIV	83593	83610	CCCGGTTCGATTCCGGG	1949	+	1.09E-07	tRNA	+	tG(GCC)D1
chrIV	91925	91942	ACAAGTTCAACTCTGAT	1479	+	2.73E-06	gene	+	YDL206W
chrIV	106120	106137	ACAAGTTCGATTCTCTT	-8108	+	5.48E-06	gene	-	YDL197C
chrIV	225726	225743	ATGCGTTCGAAACTCAT	-8148	+	6.06E-06	gene	+	YDL132W
chrIV	252250	252267	ACGAATTCAATACCCAG	-8191	+	7.06E-06	gene	+	YDL116W
chrIV	255750	255767	GCAAGTTCAAATCCGAG	1764	-	6.72E-07	gene	+	YDL114W
chrIV	282772	282789	ACCGGTTCCATCCCTGG	-8211	-	7.67E-06	gene	-	YDL100C
chrIV	302109	302126	GCAGGTTCGACTCCGCT	1575	+	1.96E-06	gene	+	YDL086W
chrIV	303437	303454	GTGGGTTCGATTCTTTG	-8037	-	4.97E-06	gene	+	YDL085W
chrIV	359647	359664	AGGGGTTCGAGCCCCCT	-8164	+	6.38E-06	tRNA	+	tK(UUU)D
chrIV	377961	377978	ACGAGTTCAAATCCTCG	1872	+	2.62E-07	gene	-	YDL042C
chrIV	434271	434288	ATCGGTTCAAATCCGAT	1701	-	1.04E-06	tRNA	-	tT(AGU)D
chrIV	437828	437845	GCAGGTTCGAGTCCTGC	-8243	+	8.92E-06	tRNA	+	tS(AGA)D1
chrIV	460336	460353	CTCAGTTCAAACCCTCT	1568	-	2.02E-06	gene	-	YDR006C
chrIV	466225	466242	ATGGGTTCGATGCCCAT	-7934	+	4.77E-06	gene	+	YDR011W
chrIV	488804	488821	CCGAGTTCGAACCTCGG	2119	-	6.24E-09	tRNA	-	tV(UAC)D
chrIV	495439	495456	ATAAGTTCAATTCTCTT	-8205	+	7.46E-06	gene	-	YDR027C
chrIV	519801	519818	GCGAGTTCGAACCTCGC	2012	+	4.53E-08	tRNA	+	tL(UAA)D
chrIV	521018	521035	CCCGGTTCGAATCCGGG	1897	+	2.02E-07	tRNA	+	tQ(UUG)D1
chrIV	540140	540157	CGGGGTTCGTATCCCAG	-8203	-	7.39E-06	gene	+	YDR041W
chrIV	568928	568945	ATGGGTTCGACCCCCAT	1849	+	3.29E-07	tRNA	+	tR(UCU)D
chrIV	569010	569027	CGGGGTTCAATTCCCCG	1949	+	1.09E-07	tRNA	+	tD(GUC)D
chrIV	619976	619993	CCAGGTTCAAGTCCTGG	-8192	-	7.08E-06	tRNA	-	tR(ACG)D
chrIV	645160	645177	CCCGGTTCGAATCCGGG	1897	-	2.02E-07	tRNA	-	tQ(UUG)D2
chrIV	657939	657956	CGCAGTTCTACTCTGAT	1049	+	4.64E-06	gene	-	YDR102C
chrIV	668014	668031	AGCGGTTCGATCCCGCT	1616	-	1.64E-06	tRNA	-	tI(AAU)D
chrIV	669532	669549	GCGGGTTCAATTGTTGC	-8257	-	9.58E-06	gene	-	YDR107C
chrIV	749633	749650	AGAAGTTCAATACCCAG	1669	+	1.26E-06	gene	-	YDR146C
chrIV	792702	792719	GTAAGTTCAAATCCGAT	1689	-	1.11E-06	gene	-	YDR169C
chrIV	802738	802755	CCCGGTTCGAATCCGGG	1897	-	2.02E-07	tRNA	-	tQ(UUG)D3
chrIV	884468	884485	GTGGGTTCAAACCCCAC	1947	+	1.12E-07	tRNA	+	tI(UAU)D
chrIV	932833	932850	GTGGGTTCAATTTCGGT	-8178	+	6.72E-06	gene	+	YDR234W
chrIV	980981	980998	GCAGGTTCGAGTCCTGC	-8243	-	8.92E-06	tRNA	-	tS(AGA)D2
chrIV	992877	992894	CCCGGTTCGATTCCGGG	1949	+	1.09E-07	tRNA	+	tG(GCC)D2
chrIV	1017214	1017231	CGGGGTTCGACTCCCCG	1732	-	8.43E-07	gene	-	YDR278C
chrIV	1017214	1017231	CGGGGTTCGACTCCCCG	1732	-	8.43E-07	tRNA	-	tE(CUC)D
chrIV	1075479	1075496	CCGAGTTCGATCCTCGG	2171	-	1.49E-09	tRNA	-	tV(CAC)D
chrIV	1079652	1079669	GTGATTTCGAATCCCGC	-8174	+	6.62E-06	gene	-	YDR309C
chrIV	1095377	1095394	CTGTGTTCGATCCACAG	-8146	-	6.03E-06	tRNA	-	tF(GAA)D
chrIV	1150849	1150866	GCAGGTTCGAATCCTGT	1876	-	2.51E-07	tRNA	-	tX(XXX)D
chrIV	1155580	1155597	ACCAGTTCTAACCTTAG	1429	+	3.11E-06	gene	-	YDR342C
chrIV	1160972	1160989	ACCAGTTCTAACCTTAG	1429	+	3.11E-06	gene	-	YDR343C
chrIV	1164321	1164338	ACCAGTTCTAACCTTAG	1429	+	3.11E-06	gene	-	YDR345C
chrIV	1175876	1175893	GAGAGTTCGAACCTCCC	-8187	+	6.95E-06	tRNA	+	tM(CAU)D
chrIV	1201797	1201814	AGGGGTTCGAGCCCCCT	-8164	+	6.38E-06	tRNA	+	tK(CUU)D1
chrIV	1257015	1257032	CCGGGTTCGATTCCCGG	2280	-	6.34E-12	tRNA	-	tG(CCC)D
chrIV	1276786	1276803	GCGGGTTCAAACCCACC	-8168	-	6.47E-06	gene	-	YDR404C
chrIV	1295044	1295061	ACGGGTTTGATTCTGAT	-8170	+	6.52E-06	gene	+	YDR412W
chrIV	1295044	1295061	ACGGGTTTGATTCTGAT	-8170	+	6.52E-06	gene	-	YDR413C
chrIV	1305687	1305704	GCAGGTTCGAGTCCTGC	-8243	+	8.92E-06	tRNA	+	tS(AGA)D3
chrIV	1352473	1352490	AGGGGTTCGAGCCCCCT	-8164	-	6.38E-06	gene	-	YDR445C
chrIV	1352473	1352490	AGGGGTTCGAGCCCCCT	-8164	-	6.38E-06	tRNA	-	tK(CUU)D2
chrIV	1378688	1378705	AGATGTTCAACCCTGAT	1152	+	4.46E-06	gene	+	YDR457W
chrIV	1444973	1444990	ATGGGTTCGAATCTGAT	1937	-	1.27E-07	gene	-	YDR497C
chrIV	1481498	1481515	ATTGGTTCGATTCTTCT	-8216	-	7.84E-06	gene	-	YDR520C
chrV	40122	40139	CCATGTTCAATTCTTGC	1597	+	1.79E-06	gene	-	YEL060C
chrV	61897	61914	CCCGGTTCGATTCCGGG	1949	-	1.09E-07	tRNA	-	tG(GCC)E
chrV	86660	86677	GCAGGTTCGAGTCCTGC	-8243	+	8.92E-06	tRNA	+	tS(AGA)E
chrV	121054	121071	ATGAGTTGGATTCCGAT	-8228	+	8.31E-06	gene	-	YEL019C
chrV	131089	131106	CCCGGTTCGAATCCGGG	1897	-	2.02E-07	tRNA	-	tQ(UUG)E2
chrV	135432	135449	AGGGGTTCGAGCCCCCT	-8164	-	6.38E-06	tRNA	-	tK(CUU)E1
chrV	138712	138729	ATGGGTTCGACCCCCAT	1849	+	3.29E-07	tRNA	+	tR(UCU)E
chrV	158566	158583	GCGGGTTCAAACCTTTG	-8122	-	5.66E-06	gene	-	YER003C
chrV	177145	177162	CGGGGTTCGACTCCCCG	1732	+	8.43E-07	tRNA	+	tE(UUC)E1
chrV	250332	250349	CCCGGTTCGAATCCGGG	1897	+	2.02E-07	tRNA	+	tQ(UUG)E1
chrV	274770	274787	ATCGGTTCAATACCCTT	-8259	-	9.69E-06	gene	+	YER060W
chrV	288450	288467	GCTGGTTCAAATCCTGC	-8210	-	7.63E-06	tRNA	-	tS(UGA)E
chrV	312030	312047	ATCGGTTCGATTCCGGT	1868	-	2.72E-07	tRNA	-	tA(UGC)E
chrV	331685	331702	AGAGGTTCTAACCTTCC	1222	-	4.26E-06	gene	+	YER087W
chrV	354980	354997	CGGGGTTCGACTCCCCG	1732	+	8.43E-07	tRNA	+	tE(UUC)E2
chrV	363270	363287	CCGGTTTCAATTCTTAG	-8209	-	7.60E-06	gene	+	YER102W
chrV	417267	417284	CCATGTTCAAAACTCCT	1543	-	2.22E-06	gene	+	YER129W
chrV	432730	432747	ATGTGTTCTACTCCTGT	1327	+	3.77E-06	gene	+	YER133W
chrV	432730	432747	ATGTGTTCTACTCCTGT	1327	+	3.77E-06	intron	+	YER133W
chrV	435759	435776	AGGGGTTCGAGCCCCCT	-8164	-	6.38E-06	tRNA	-	tK(CUU)E2
chrV	438748	438765	CCCAGTTCGATCCTGGG	1840	+	3.57E-07	tRNA	+	tV(AAC)E1
chrV	443209	443226	AGCGGTTCGATCCCGCT	1616	-	1.64E-06	tRNA	-	tI(AAU)E1
chrV	469505	469522	CCCAGTTCGATCCTGGG	1840	+	3.57E-07	tRNA	+	tV(AAC)E2
chrV	487338	487355	CGGGGTTCGACTCCCCG	1732	-	8.43E-07	tRNA	-	tE(UUC)E3
chrV	492359	492376	CCAGGTTCAAGTCCTGG	-8192	-	7.08E-06	tRNA	-	tR(ACG)E
chrV	551292	551309	AGCGGTTCGATCCCGCT	1616	-	1.64E-06	tRNA	-	tI(AAU)E2
chrVI	72676	72693	GTGGATTCGATACTTGG	-8244	+	8.97E-06	gene	-	YFL033C
chrVI	101453	101470	CTGGGTTCAATTCCCAG	2124	+	5.55E-09	tRNA	+	tP(UGG)F
chrVI	136324	136341	ACAAGTTCTAAACCTCT	1359	+	3.59E-06	gene	-	YFL003C
chrVI	137493	137510	GTGAGTTCAACCCTCAC	1635	-	1.50E-06	tRNA	-	tN(GUU)F
chrVI	157923	157940	CTGTGTTCGATCCACAG	-8146	-	6.03E-06	tRNA	-	tF(GAA)F
chrVI	162273	162290	CCCGGTTCGATTCCGGG	1949	+	1.09E-07	tRNA	+	tG(GCC)F1
chrVI	180981	180998	CCCGGTTCGATTCCGGG	1949	-	1.09E-07	tRNA	-	tG(GCC)F2
chrVI	186999	187016	ATGTGTTCAAATCCCTC	-8249	-	9.20E-06	gene	+	YFR019W
chrVI	191520	191537	GCAGGTTCGAATCCTGT	1876	-	2.51E-07	tRNA	-	tS(GCU)F
chrVI	226695	226712	AGGGGTTCGAGCCCCCT	-8164	-	6.38E-06	tRNA	-	tK(CUU)F
chrVI	238659	238676	ACGGGTTCAAATATGGT	-8219	+	7.95E-06	gene	+	YFR042W
chrVII	36926	36943	CGGAGTTCCATTCCGGG	-8173	-	6.60E-06	gene	+	YGL247W
chrVII	41623	41640	CCGACTTCAATTCTCCT	-8204	-	7.43E-06	gene	+	YGL244W
chrVII	73836	73853	CCCAGTTCGATCCTGGG	1840	-	3.57E-07	tRNA	-	tV(AAC)G3
chrVII	115558	115575	AGGGGTTCGAGCCCCCT	-8164	+	6.38E-06	tRNA	+	tK(UUU)G1
chrVII	122316	122333	AGGGGTTCGAGCCCCCT	-8164	+	6.38E-06	tRNA	+	tK(CUU)G1
chrVII	144956	144973	GTGGGTTAAAATCTCAG	-8178	+	6.72E-06	gene	+	YGL191W
chrVII	185721	185738	AGGGGTTCGAGCCCCCT	-8164	-	6.38E-06	tRNA	-	tK(CUU)G2
chrVII	194463	194480	CCGGGTTCAAAAGCCAG	-8183	-	6.84E-06	gene	-	YGL163C
chrVII	203552	203569	ATAAGTTCAAATCTGAT	1659	+	1.32E-06	gene	+	YGL159W
chrVII	287357	287374	GCAGGTTCAATTCCTGT	1872	-	2.62E-07	tRNA	-	tW(CCA)G1
chrVII	316972	316989	ATAAGTTCTATCCCGCC	1411	+	3.24E-06	snoRNA	+	snR82
chrVII	328629	328646	CGGGGTTCGACTCCCCG	1732	+	8.43E-07	tRNA	+	tE(UUC)G1
chrVII	342642	342659	CGGAGTTCGATTCATGG	-8200	+	7.30E-06	gene	-	YGL091C
chrVII	396151	396168	ACCTGTTCTATACTCCT	1325	+	3.78E-06	gene	-	YGL056C
chrVII	401534	401551	CGGGGTTCGACTCCCCG	1732	-	8.43E-07	tRNA	-	tE(UUC)G2
chrVII	405516	405533	ATGGGTTCGACCCCCAT	1849	+	3.29E-07	tRNA	+	tR(UCU)G1
chrVII	412301	412318	CCCAGTTCGATCCTGGG	1840	-	3.57E-07	tRNA	-	tV(AAC)G1
chrVII	440723	440740	CTGTGTTCGATCCACAG	-8146	-	6.03E-06	tRNA	-	tF(GAA)G
chrVII	490472	490489	AGGAGTTCGTTCCCCAT	-8263	-	9.90E-06	gene	-	YGL005C
chrVII	531656	531673	CGGGGTTCAATTCCCCG	1949	+	1.09E-07	tRNA	+	tD(GUC)G1
chrVII	541896	541913	CGGGGTTCGACTCCCCG	1732	+	8.43E-07	tRNA	+	tE(UUC)G3
chrVII	544584	544601	CGGGGTTCAATTCCCCG	1949	-	1.09E-07	tRNA	-	tD(GUC)G2
chrVII	561669	561686	GCAGGTTCGAGTCCTGC	-8243	-	8.92E-06	tRNA	-	tS(AGA)G
chrVII	623309	623326	ACGAGGTCGATACCTGT	-8247	+	9.10E-06	gene	-	YGR067C
chrVII	688189	688206	CCCGGTTCAAAACTGAT	1615	-	1.65E-06	gene	+	YGR099W
chrVII	700731	700748	GCGGGTTCAAACCCCGC	2047	+	2.53E-08	tRNA	+	tL(GAG)G
chrVII	700960	700977	AGGGGTTCGAGCCCCCT	-8164	-	6.38E-06	tRNA	-	tK(UUU)G2
chrVII	707115	707132	CTTAGTTCGATCCTGAG	-8181	-	6.79E-06	tRNA	-	tC(GCA)G
chrVII	708188	708205	TCAAGTTCGAATCCTGG	-8179	-	6.74E-06	LTR_retrotransposon	+	YGRWTy3-1
chrVII	708188	708205	TCAAGTTCGAATCCTGG	-8179	-	6.74E-06	transposable_element_gene	+	YGR109W-A
chrVII	708188	708205	TCAAGTTCGAATCCTGG	-8179	-	6.74E-06	transposable_element_gene	+	YGR109W-B
chrVII	731185	731202	GTGAGTTCAACCCTCAC	1635	+	1.50E-06	tRNA	+	tN(GUU)G
chrVII	736386	736403	ATGGGTTCGACCCCCAT	1849	+	3.29E-07	tRNA	+	tR(UCU)G3
chrVII	739170	739187	AGCGGTTCGATCCCGCT	1616	+	1.64E-06	tRNA	+	tI(AAU)G
chrVII	743254	743271	ATAAGTTCGATGCTCAC	-8253	+	9.39E-06	gene	+	YGR125W
chrVII	743383	743400	GTGACTTCAATTCCTGT	-8255	-	9.48E-06	gene	+	YGR125W
chrVII	779662	779679	ACGGGTTCGATTCTCGT	2203	+	4.45E-10	tRNA	+	tG(UCC)G
chrVII	794464	794481	ATCGGTTCGATTCCGGT	1868	+	2.72E-07	tRNA	+	tA(UGC)G
chrVII	803071	803088	CTGGGTTCAAATCTTCA	-8225	+	8.19E-06	gene	+	YGR157W
chrVII	823530	823547	CCCAGTTCGATCCTGGG	1840	+	3.57E-07	tRNA	+	tV(AAC)G2
chrVII	828730	828747	ATGGGTTCGACCCCCAT	1849	-	3.29E-07	gene	+	YGR164W
chrVII	828730	828747	ATGGGTTCGACCCCCAT	1849	-	3.29E-07	tRNA	-	tR(UCU)G2
chrVII	845694	845711	CCCGGTTCGATTCCGGG	1949	+	1.09E-07	tRNA	+	tG(GCC)G1
chrVII	876441	876458	AGGGGTTCGAGCCCCCT	-8164	+	6.38E-06	tRNA	+	tK(CUU)G3
chrVII	878717	878734	GCAGGTTCAATTCCTGT	1872	-	2.62E-07	tRNA	-	tW(CCA)G2
chrVII	930960	930977	CCCGGTTCGATTCCGGG	1949	-	1.09E-07	tRNA	-	tG(GCC)G2
chrVII	1003344	1003361	ACGGGTTCAATTCTCCT	2044	-	2.65E-08	gene	-	YGR255C
chrVII	1067508	1067525	AGAAGTTCAAAACCGAG	1503	+	2.54E-06	gene	-	YGR287C
chrVIII	20887	20904	ACGAGTTGAATCCTGAG	-8264	-	9.95E-06	gene	-	YHL040C
chrVIII	61295	61312	GTGAATTCGAATCTGGT	-8265	+	1.00E-05	gene	-	YHL023C
chrVIII	85305	85322	CCCAGTTCGATCCTGGG	1840	-	3.57E-07	tRNA	-	tV(AAC)H
chrVIII	116114	116131	ATCGGTTCAAATCCGAT	1701	-	1.04E-06	tRNA	-	tT(AGU)H
chrVIII	133033	133050	GCAGGTTCGAGTCCTGC	-8243	-	8.92E-06	tRNA	-	tS(AGA)H
chrVIII	134367	134384	CCCGGTTCGAATCCGGG	1897	+	2.02E-07	tRNA	+	tQ(UUG)H
chrVIII	156443	156460	AGCAGTTCAATTCTTCC	1404	-	3.29E-06	gene	+	YHR023W
chrVIII	165753	165770	CTAGGTTCAATTCCCTG	-8074	+	5.17E-06	gene	-	YHR028C
chrVIII	237855	237872	CTGTGTTCGATCCACAG	-8146	-	6.03E-06	tRNA	-	tF(GAA)H1
chrVIII	288445	288462	ACCAGTTCTAACCTTAG	1429	+	3.11E-06	gene	-	YHR092C
chrVIII	315457	315474	GTAAGTTCAACACCTGG	1442	+	3.02E-06	gene	-	YHR101C
chrVIII	358485	358502	CTGTGTTCGATCCACAG	-8146	-	6.03E-06	tRNA	-	tF(GAA)H2
chrVIII	369283	369300	CCGGGTTTGATTCTGGC	-8165	+	6.40E-06	gene	-	YHR132C
chrVIII	388900	388917	CTGGGTTCAATTCCCAG	2124	-	5.55E-09	tRNA	-	tP(UGG)H
chrVIII	392374	392391	AGAAGTTCGAACCTTAC	1483	-	2.70E-06	ARS	.	ARS818
chrVIII	419593	419610	GGATGTTCTAAACCTGT	1146	+	4.48E-06	gene	-	YHR160C
chrVIII	467036	467053	GCTAGTTCAATTCTGGC	-8226	+	8.23E-06	gene	+	YHR180W-A
chrVIII	467036	467053	GCTAGTTCAATTCTGGC	-8226	+	8.23E-06	gene	-	YHR180C-B
chrVIII	467036	467053	GCTAGTTCAATTCTGGC	-8226	+	8.23E-06	tRNA	+	tT(UGU)H
chrVIII	475169	475186	CTGAGTTCAATCCAGCG	-8223	-	8.10E-06	gene	-	YHR185C
chrVIII	475713	475730	CCGAGTTCGATCCTCGG	2171	-	1.49E-09	tRNA	-	tV(CAC)H
chrVIII	505024	505041	GTCAGTTCTAACCTTAC	1287	+	3.98E-06	gene	-	YHR203C
chrIX	17070	17087	AGAAGTTCAAAACCGAG	1503	+	2.54E-06	gene	-	YIL172C
chrIX	61265	61282	GTGGGATCGAATCCTAG	-8222	+	8.07E-06	gene	-	YIL150C
chrIX	100108	100125	CCCAGTTCAAATCCTCC	1567	-	2.03E-06	gene	-	YIL132C
chrIX	175078	175095	ATCGGTTCAAATCCGAT	1701	+	1.04E-06	tRNA	+	tT(AGU)I1
chrIX	175078	175095	ATCGGTTCAAATCCGAT	1701	+	1.04E-06	ARS	.	ARS912
chrIX	183447	183464	AGCGGTTCGATCCCGCT	1616	-	1.64E-06	tRNA	-	tI(AAU)I1
chrIX	197638	197655	CGGGGTTCGACTCCCCG	1732	+	8.43E-07	tRNA	+	tE(CUC)I
chrIX	206213	206230	TCAAGTTCGAATCCTGG	-8179	-	6.74E-06	LTR_retrotransposon	+	YILWTy3-1
chrIX	206213	206230	TCAAGTTCGAATCCTGG	-8179	-	6.74E-06	gene	+	YIL082W
chrIX	206213	206230	TCAAGTTCGAATCCTGG	-8179	-	6.74E-06	transposable_element_gene	+	YIL082W-A
chrIX	206213	206230	TCAAGTTCGAATCCTGG	-8179	-	6.74E-06	pseudogene	+	YIL080W
chrIX	210713	210730	AGCGGTTCGATCCCGCT	1616	+	1.64E-06	tRNA	+	tI(AAU)I2
chrIX	248906	248923	GCTGGTTCAAATCCTGC	-8210	+	7.63E-06	tRNA	+	tS(UGA)I
chrIX	300235	300252	AGGGGTTCGAGCCCCCT	-8164	-	6.38E-06	tRNA	-	tK(CUU)I
chrIX	319639	319656	ACGGGTTGGAATCCCAC	-8131	-	5.79E-06	gene	-	YIL017C
chrIX	324310	324327	CGGGGTTCAATTCCCCG	1949	-	1.09E-07	tRNA	-	tD(GUC)I1
chrIX	325795	325812	ATCGGTTCAAATCCGAT	1701	+	1.04E-06	tRNA	+	tT(AGU)I2
chrIX	336356	336373	CGGGGTTCAATTCCCCG	1949	-	1.09E-07	tRNA	-	tD(GUC)I2
chrIX	366872	366889	CTCAGTTCAAAACTGCT	1476	-	2.75E-06	gene	-	YIR006C
chrIX	370463	370480	CGGGGTTCGACTCCCCG	1732	+	8.43E-07	tRNA	+	tE(UUC)I
chrX	17053	17070	AGAAGTTCAAAACCGAG	1503	+	2.54E-06	gene	-	YJL221C
chrX	20375	20392	TCAAGTTCGATTCCCGC	-8084	-	5.25E-06	gene	+	YJL219W
chrX	32669	32686	CCGTGTTCGATACCCTT	-8130	-	5.78E-06	gene	+	YJL213W
chrX	57188	57205	CCGTGTTCAAATCCTCT	1707	+	1.00E-06	gene	-	YJL200C
chrX	59107	59124	ATCGGTTCAAATCCGAT	1701	-	1.04E-06	tRNA	-	tT(AGU)J
chrX	105072	105089	ATGCGTTCAATTCCTCT	-8200	-	7.30E-06	gene	+	YJL167W
chrX	115946	115963	CGGGGTTCGACTCCCCG	1732	-	8.43E-07	tRNA	-	tE(UUC)J
chrX	127924	127941	AAGAGTTCAATTCTTAC	-8259	-	9.69E-06	gene	-	YJL156C
chrX	155647	155664	ACATGTTCAACACCGGT	1342	-	3.69E-06	gene	-	YJL137C
chrX	155953	155970	ATGAGTTTAAACCTCAG	-8243	-	8.92E-06	gene	-	YJL137C
chrX	176790	176807	ACCTGTTCTATTCTTGG	1421	+	3.17E-06	gene	-	YJL129C
chrX	185617	185634	CTGAGATCAAATCCCAT	-8216	-	7.84E-06	gene	-	YJL125C
chrX	204781	204798	CGGGGTTCAATTCCCCG	1949	+	1.09E-07	ARS	.	ARS1008
chrX	204781	204798	CGGGGTTCAATTCCCCG	1949	+	1.09E-07	tRNA	+	tD(GUC)J1
chrX	233986	234003	CCAGGTTCGAGTCCTGG	-8136	+	5.87E-06	tRNA	+	tR(ACG)J
chrX	247301	247318	ATGAGTTCGAATCAGAC	-8257	-	9.58E-06	gene	+	YJL095W
chrX	273208	273225	GTGAGTTAAAATCCCAT	-8229	-	8.34E-06	gene	+	YJL085W
chrX	355420	355437	ATGGGTTCGACCCCCAT	1849	+	3.29E-07	tRNA	+	tR(UCU)J1
chrX	355502	355519	CGGGGTTCAATTCCCCG	1949	+	1.09E-07	tRNA	+	tD(GUC)J2
chrX	374431	374448	CGGGGTTCAATTCCCCG	1949	-	1.09E-07	tRNA	-	tD(GUC)J3
chrX	374513	374530	ATGGGTTCGACCCCCAT	1849	-	3.29E-07	tRNA	-	tR(UCU)J2
chrX	378408	378425	CCCAGTTCGATCCTGGG	1840	+	3.57E-07	tRNA	+	tV(AAC)J
chrX	391050	391067	GAGAGTTCGAACCTCCC	-8187	-	6.95E-06	tRNA	-	tM(CAU)J1
chrX	396733	396750	CCCGGTTCGATTCCGGG	1949	-	1.09E-07	tRNA	-	tG(GCC)J1
chrX	415013	415030	AGGGGTTCGAGCCCCCT	-8164	+	6.38E-06	tRNA	+	tK(CUU)J
chrX	415938	415955	GCAGGTTCAATTCCTGT	1872	-	2.62E-07	tRNA	-	tW(CCA)J
chrX	422984	423001	GAGAGTTCGAACCTCCC	-8187	+	6.95E-06	gene	-	YJL007C
chrX	422984	423001	GAGAGTTCGAACCTCCC	-8187	+	6.95E-06	tRNA	+	tM(CAU)J2
chrX	424439	424456	GCGAGTTCGAACCTCGC	2012	-	4.53E-08	tRNA	-	tL(UAA)J
chrX	524019	524036	GCAGGTTCGAGTCCTGC	-8243	-	8.92E-06	tRNA	-	tS(AGA)J
chrX	531873	531890	CCCGGTTCGATTCCGGG	1949	+	1.09E-07	tRNA	+	tG(GCC)J2
chrX	538601	538618	GCGGGTTCGAGTCCCGT	-7878	+	4.75E-06	tRNA	+	tR(CCU)J
chrX	541554	541571	CGGGGTTCAATTCCCCG	1949	+	1.09E-07	tRNA	+	tD(GUC)J4
chrX	693304	693321	GTGGGTTCGATTCTTTG	-8037	+	4.97E-06	gene	-	YJR140C
chrX	702575	702592	GTCGGTTCTAACCTTAC	1341	+	3.70E-06	gene	-	YJR145C
chrX	726502	726519	CGCAGTTCTATTCTTAG	1333	+	3.74E-06	gene	+	YJR154W
chrXI	29659	29676	ACATGTTCTAACCTCCC	1340	+	3.70E-06	gene	-	YKL215C
chrXI	46742	46759	GTGGGTTCAATTCCCAC	2017	-	4.18E-08	tRNA	-	tT(CGU)K
chrXI	74672	74689	GTGAGTTCAACCCTCAC	1635	+	1.50E-06	tRNA	+	tN(GUU)K
chrXI	77438	77455	ACGGGTTCGTTTCTTAT	-8193	+	7.11E-06	gene	-	YKL194C
chrXI	84266	84283	GCGAGTTCGAACCTCGC	2012	+	4.53E-08	tRNA	+	tL(UAA)K
chrXI	95243	95260	CCAAGTTCCATTCCCCG	-8158	+	6.25E-06	gene	+	YKL185W
chrXI	130016	130033	ATGAGTTCGAACCTAGG	-8040	+	4.98E-06	gene	+	YKL171W
chrXI	141025	141042	CGGGGTTCGACTCCCCG	1732	-	8.43E-07	tRNA	-	tE(UUC)K
chrXI	162494	162511	ATGGGTTCGACCCCCAT	1849	-	3.29E-07	tRNA	-	tR(UCU)K
chrXI	203046	203063	AGGGGTTCGAGCCCCCT	-8164	+	6.38E-06	tRNA	+	tK(CUU)K
chrXI	273001	273018	GGGAGTTCAACTCTCGT	1641	-	1.45E-06	gene	+	YKL090W
chrXI	302998	303015	GCAGGTTCAATTCCTGT	1872	+	2.62E-07	tRNA	+	tW(CCA)K
chrXI	308151	308168	CCCAGTTCGATCCTGGG	1840	-	3.57E-07	tRNA	-	tV(AAC)K1
chrXI	379728	379745	CCCAGTTCGATCCTGGG	1840	+	3.57E-07	tRNA	+	tV(AAC)K2
chrXI	446073	446090	CCAAGTTCGATTCTCAT	1928	-	1.41E-07	gene	+	YKR003W
chrXI	470342	470359	GTGTGTTCAATTCCGTG	-8224	-	8.14E-06	gene	+	YKR016W
chrXI	491015	491032	CCAGGTTCAAGTCCTGG	-8192	+	7.08E-06	tRNA	+	tR(ACG)K
chrXI	502323	502340	ATGAGTTCAATGCCCAC	-8104	+	5.43E-06	gene	-	YKR031C
chrXI	513339	513356	CGGGGTTCAATTCCCCG	1949	-	1.09E-07	tRNA	-	tD(GUC)K
chrXI	515132	515149	CTGAGTTAGAAACTCAG	-8259	-	9.69E-06	gene	+	YKR039W
chrXI	569294	569311	CCGGGTTCTATTCTCTT	-8151	+	6.12E-06	gene	+	YKR067W
chrXI	579035	579052	AGGGGTTCGAGCCCCCT	-8164	+	6.38E-06	tRNA	+	tK(UUU)K
chrXI	582907	582924	ATGACTTCAATTCTTGG	-8251	+	9.30E-06	gene	+	YKR076W
chrXI	634029	634046	GGATGTTCAAATCTGGC	1383	+	3.43E-06	gene	-	YKR098C
chrXII	92625	92642	CTGGGTTCAATTCCCAG	2124	+	5.55E-09	tRNA	+	tP(UGG)L
chrXII	117381	117398	CCGGGTTCAAACCATCT	-8237	-	8.66E-06	gene	+	YLL015W
chrXII	135006	135023	CCAGGTTCGATACTGTT	-8258	+	9.63E-06	gene	-	YLL007C
chrXII	167951	167968	GCAGGTTCGAGTCCTGC	-8243	-	8.92E-06	tRNA	-	tS(AGA)L
chrXII	214890	214907	ATCGGTTCGATTCCGGT	1868	-	2.72E-07	tRNA	-	tA(UGC)L
chrXII	325552	325569	CCGGGTTCAATTCTCTT	-7936	-	4.77E-06	gene	+	YLR092W
chrXII	357329	357346	ATAAGTTCAAACCTTCC	1514	+	2.45E-06	gene	-	YLR106C
chrXII	374402	374419	CCAGGTTCAAGTCCTGG	-8192	+	7.08E-06	tRNA	+	tR(ACG)L
chrXII	412098	412115	ATGGCTTCAAACCCCAT	-8186	-	6.92E-06	gene	+	YLR134W
chrXII	422921	422938	TCCAGTTCGATTCTCCT	-8213	-	7.74E-06	gene	-	YLR139C
chrXII	427178	427195	CGGGGTTCAATTCCCCG	1949	+	1.09E-07	tRNA	+	tD(GUC)L1
chrXII	448657	448674	CCCGGTTCGAATCCGGG	1897	-	2.02E-07	tRNA	-	tQ(UUG)L
chrXII	544905	544922	CTGAGTTCAAATCCCAT	1984	-	6.78E-08	gene	+	YLR196W
chrXII	605307	605324	GTGGGTTCAATCCCCAC	1999	-	5.41E-08	tRNA	-	tI(UAU)L
chrXII	625386	625403	AGGTGTTCTATTCTTGG	1466	+	2.83E-06	gene	-	YLR244C
chrXII	687866	687883	CCCAGTTCGATCCTGGG	1840	-	3.57E-07	tRNA	-	tV(AAC)L
chrXII	734850	734867	AGCGGTTCGATCCCGCT	1616	+	1.64E-06	tRNA	+	tI(AAU)L1
chrXII	777502	777519	GCGGGTTCAAACATGGT	-8244	-	8.97E-06	gene	-	YLR321C
chrXII	784428	784445	GCAGGTTCGAATCCTGT	1876	+	2.51E-07	tRNA	+	tS(GCU)L
chrXII	793964	793981	CGGGGTTCAATTCCCCG	1949	+	1.09E-07	tRNA	+	tD(GUC)L2
chrXII	797224	797241	CGGGGTTCGACTCCCCG	1732	+	8.43E-07	tRNA	+	tE(UUC)L
chrXII	814837	814854	CGGTGTTCTATTCTTCT	1335	+	3.73E-06	gene	+	YLR342W
chrXII	818655	818672	CCGGGTTCGAGTCCCGG	-7831	+	4.75E-06	tRNA	+	tR(CCG)L
chrXII	824862	824879	ATGAGTTCAATGCCCGT	-7985	-	4.82E-06	gene	-	YLR347C
chrXII	824862	824879	ATGAGTTCAATGCCCGT	-7985	-	4.82E-06	gene	+	YLR347W-A
chrXII	842897	842914	CCAGGTTCTAATCTTGT	1581	-	1.91E-06	gene	+	YLR357W
chrXII	875446	875463	AGGGGTTCGAGCCCCCT	-8164	+	6.38E-06	tRNA	+	tK(UUU)L
chrXII	886863	886880	ACGAGTTCGAAACTCCG	1932	+	1.35E-07	gene	+	YLR383W
chrXII	901072	901089	CAGGGTTCAAACCTGGC	-8187	+	6.95E-06	gene	-	YLR389C
chrXII	931234	931251	CTTGGTTCAATTCTGGG	-8106	+	5.46E-06	gene	-	YLR406C
chrXII	962979	962996	GCGAGTTCGAACCTCGC	2012	-	4.53E-08	tRNA	-	tL(UAA)L
chrXII	975990	976007	GTGAGTTCAACCCTCAC	1635	-	1.50E-06	tRNA	-	tN(GUU)L
chrXII	1015289	1015306	CCGACTTCGAACCTCAT	-8174	+	6.62E-06	gene	+	YLR439W
chrXII	1036156	1036173	CCCAGTTCTATTCCTAG	1542	-	2.22E-06	gene	+	YLR451W
chrXII	1052078	1052095	AGCGGTTCGATCCCGCT	1616	-	1.64E-06	tRNA	-	tI(AAU)L2
chrXIII	45672	45689	AGCAGTTCAATTCCGAT	1568	+	2.02E-06	gene	+	YML112W
chrXIII	82356	82373	ACATGTTCGAAACTTAG	1534	+	2.29E-06	gene	-	YML094C-A
chrXIII	82356	82373	ACATGTTCGAAACTTAG	1534	+	2.29E-06	gene	+	YML094W
chrXIII	82356	82373	ACATGTTCGAAACTTAG	1534	+	2.29E-06	intron	+	YML094W
chrXIII	131832	131849	ATGGGTTCGACCCCCAT	1849	-	3.29E-07	tRNA	-	tR(UCU)M2
chrXIII	183905	183922	CCCGGTTCGATTCCGGG	1949	-	1.09E-07	ARS	.	ARS1308
chrXIII	183905	183922	CCCGGTTCGATTCCGGG	1949	-	1.09E-07	tRNA	-	tG(GCC)M
chrXIII	196075	196092	CTGGGTTCAATTCCCAG	2124	-	5.55E-09	tRNA	-	tP(UGG)M
chrXIII	245004	245021	ACGAGTTGGAACCTTGG	-8224	+	8.14E-06	gene	+	YML013W
chrXIII	259165	259182	GCAGGTTCGAGTCCTGC	-8243	-	8.92E-06	tRNA	-	tS(AGA)M
chrXIII	290847	290864	CGGGGTTCGACTCCCCG	1732	+	8.43E-07	tRNA	+	tE(UUC)M
chrXIII	291935	291952	CTAAGTTCGATCCTTCT	1688	+	1.12E-06	gene	+	YMR012W
chrXIII	335824	335841	GAGAGTTCGATTCCCAT	-7976	-	4.81E-06	gene	+	YMR032W
chrXIII	352345	352362	CTGTGTTCGATCCACAG	-8146	+	6.03E-06	tRNA	+	tF(GAA)M
chrXIII	372452	372469	CCCAGTTCGATCCTGGG	1840	-	3.57E-07	tRNA	-	tV(AAC)M1
chrXIII	379310	379327	GCAGGTTCAATTCCTGT	1872	-	2.62E-07	tRNA	-	tW(CCA)M
chrXIII	405272	405289	ACGGTTTCAAATCCCAG	-8093	-	5.33E-06	gene	-	YMR067C
chrXIII	409736	409753	ATATGTTCAATCCTGCT	1512	+	2.46E-06	gene	+	YMR070W
chrXIII	419474	419491	CTGAGTTCGATTCTGTT	-8089	-	5.29E-06	gene	-	YMR076C
chrXIII	420595	420612	CCCAGTTCGATCCTGGG	1840	-	3.57E-07	tRNA	-	tV(AAC)M2
chrXIII	437086	437103	CCGAGTTCAATGCTTGT	-8112	-	5.53E-06	gene	+	YMR084W
chrXIII	441584	441601	ATCGGTTCGATTCACAT	-8194	-	7.14E-06	gene	+	YMR086W
chrXIII	443018	443035	ACCGGTTCAAACCCTGT	1760	-	6.94E-07	gene	+	YMR087W
chrXIII	463600	463617	CGGGGTTCAATTCCCCG	1949	+	1.09E-07	tRNA	+	tD(GUC)M
chrXIII	480628	480645	AGGGGTTCGAGCCCCCT	-8164	-	6.38E-06	tRNA	-	tK(CUU)M
chrXIII	568152	568169	ATGAGTTCAATGCCGCG	-8168	-	6.47E-06	gene	-	YMR154C
chrXIII	572890	572907	GAGAGTTCGAACCTCCC	-8187	-	6.95E-06	tRNA	-	tM(CAU)M
chrXIII	586643	586660	CCCAGTTCGATCCTGGG	1840	-	3.57E-07	tRNA	-	tV(AAC)M3
chrXIII	747899	747916	ATGGGTTCGACCCCCAT	1849	-	3.29E-07	tRNA	-	tR(UCU)M1
chrXIII	792614	792631	TCGAGTTCTAATCTCAG	-8241	-	8.83E-06	gene	-	YMR261C
chrXIII	808253	808270	CCCAGTTCGAATCCGGG	1843	-	3.48E-07	tRNA	-	tQ(CUG)M
chrXIII	811492	811509	CCCGGTTCAATTCACAG	-8169	-	6.50E-06	gene	-	YMR273C
chrXIII	844270	844287	AAAGGTTCGATTCCTGT	-8161	+	6.31E-06	gene	-	YMR287C
chrXIV	96248	96265	ACGGGTTCGATTCTCGT	2203	-	4.45E-10	gene	+	YNL285W
chrXIV	96248	96265	ACGGGTTCGATTCTCGT	2203	-	4.45E-10	tRNA	-	tG(UCC)N
chrXIV	96248	96265	ACGGGTTCGATTCTCGT	2203	-	4.45E-10	ARS	.	ARS1409
chrXIV	102764	102781	GTGAGTTCAACCCTCAC	1635	+	1.50E-06	tRNA	+	tN(GUU)N1
chrXIV	104852	104869	ATCGGTTCAAATCCGAT	1701	+	1.04E-06	tRNA	+	tT(AGU)N1
chrXIV	141564	141581	CGCAGTTCAACTCCGAC	1241	+	4.18E-06	gene	+	YNL267W
chrXIV	151724	151741	GGATGTTCAACCCTTGG	1215	-	4.29E-06	gene	+	YNL262W
chrXIV	281370	281387	AGAAGTTCAACCCTCGC	1402	+	3.31E-06	gene	+	YNL191W
chrXIV	368283	368300	GTAAGTTCAAATCTGCT	1608	+	1.70E-06	gene	+	YNL138W
chrXIV	374934	374951	CTGTGTTCGATCCACAG	-8146	+	6.03E-06	tRNA	+	tF(GAA)N
chrXIV	410374	410391	ACGAGTTCAATTCTAAG	-8044	-	4.99E-06	gene	-	YNL115C
chrXIV	430519	430536	GTGAGTTTGAATCTGGT	-8265	+	1.00E-05	gene	+	YNL102W
chrXIV	519106	519123	CGGGGTTCAATTCCCCG	1949	-	1.09E-07	tRNA	-	tD(GUC)N
chrXIV	547171	547188	CTGGGTTCAATTCCCAG	2124	+	5.55E-09	tRNA	+	tP(UGG)N1
chrXIV	547171	547188	CTGGGTTCAATTCCCAG	2124	+	5.55E-09	gene	+	YNL042W-B
chrXIV	560700	560717	ATCGGTTCAAATCCGAT	1701	-	1.04E-06	tRNA	-	tT(AGU)N2
chrXIV	568192	568209	CTGGGTTCAATTCCCAG	2124	+	5.55E-09	tRNA	+	tP(UGG)N2
chrXIV	569874	569891	AGCGGTTCGATCCCGCT	1616	-	1.64E-06	tRNA	-	tI(AAU)N1
chrXIV	571564	571581	AGCTGTTCAATACCTGC	1311	+	3.86E-06	gene	+	YNL034W
chrXIV	600669	600686	AGCTGTTCAATACCTGC	1311	-	3.86E-06	gene	-	YNL018C
chrXIV	602360	602377	AGCGGTTCGATCCCGCT	1616	+	1.64E-06	gene	-	YNL017C
chrXIV	602360	602377	AGCGGTTCGATCCCGCT	1616	+	1.64E-06	tRNA	+	tI(AAU)N2
chrXIV	631853	631870	CCGGGTTCGAGTCCCGG	-7831	-	4.75E-06	tRNA	-	tP(AGG)N
chrXIV	632647	632664	GTGAGTTCAACCCTCAC	1635	+	1.50E-06	tRNA	+	tN(GUU)N2
chrXIV	684170	684187	CTGGCTTCAATACTCAG	-8209	-	7.60E-06	gene	-	YNR031C
chrXIV	721402	721419	ACGTGTTCGACTCTGAC	1506	+	2.51E-06	gene	-	YNR053C
chrXIV	726141	726158	GCGAGTTCGAACCTCGC	2012	-	4.53E-08	tRNA	-	tL(UAA)N
chrXIV	752936	752953	ACGGGTTCAATTTTCAT	-8112	+	5.53E-06	gene	-	YNR065C
chrXV	22811	22828	AGAAGTTCAAAACCGAG	1503	+	2.54E-06	gene	-	YOL157C
chrXV	110969	110986	ACGGGTTCGATTCTCGT	2203	-	4.45E-10	tRNA	-	tG(UCC)O
chrXV	113849	113866	ATCGGTTCAAATCCGAT	1701	+	1.04E-06	tRNA	+	tT(AGU)O1
chrXV	113849	113866	ATCGGTTCAAATCCGAT	1701	+	1.04E-06	ARS	.	ARS1509
chrXV	140105	140122	GTGAGTTCAATACGGGT	-8245	-	9.01E-06	gene	-	YOL095C
chrXV	208218	208235	CCGTGTTCAAATCCTTG	-8245	+	9.01E-06	gene	-	YOL063C
chrXV	226618	226635	CCCGGTTCGATTCCGGG	1949	-	1.09E-07	tRNA	-	tG(GCC)O1
chrXV	228379	228396	GTGAGTTCAACCCTCAC	1635	+	1.50E-06	tRNA	+	tN(GUU)O1
chrXV	274748	274765	GCAGGTTCGAATCCTGT	1876	+	2.51E-07	tRNA	+	tS(GCU)O
chrXV	275774	275791	ACCGGTTCTATTCCCCC	1589	+	1.85E-06	gene	+	YOL025W
chrXV	282209	282226	CCCGGTTCGATTCCGGG	1949	+	1.09E-07	tRNA	+	tG(GCC)O2
chrXV	301173	301190	CTGGGTTCAATTCCCAG	2124	+	5.55E-09	gene	+	YOL013W-A
chrXV	301173	301190	CTGGGTTCAATTCCCAG	2124	+	5.55E-09	tRNA	+	tP(UGG)O1
chrXV	340306	340323	CCAGGTTCAAGTCCTGG	-8192	-	7.08E-06	tRNA	-	tR(ACG)O
chrXV	352336	352353	ACAAGTTCAACACCGAT	1420	-	3.17E-06	gene	+	YOR011W
chrXV	354048	354065	ATCGGTTCAAATCCGAT	1701	-	1.04E-06	tRNA	-	tT(AGU)O2
chrXV	369498	369515	AGCAGTTCAACACCTCT	1132	+	4.51E-06	gene	+	YOR019W
chrXV	438713	438730	AGGGGTTCGAGCCCCCT	-8164	+	6.38E-06	tRNA	+	tK(UUU)O
chrXV	464526	464543	CTGGGTTCAATTCCCAG	2124	+	5.55E-09	tRNA	+	tP(UGG)O2
chrXV	464526	464543	CTGGGTTCAATTCCCAG	2124	+	5.55E-09	gene	+	YOR072W-B
chrXV	484691	484708	ATCAGTTCTACCCTTCG	1123	+	4.53E-06	gene	-	YOR086C
chrXV	487487	487504	GTGAGTTCAACCCTCAC	1635	+	1.50E-06	tRNA	+	tN(GUU)O2
chrXV	491367	491384	CTGGGTTTGATCCTGAT	-8223	+	8.10E-06	gene	-	YOR090C
chrXV	572004	572021	CGGGGTTCAATTCCCCG	1949	+	1.09E-07	tRNA	+	tD(GUC)O
chrXV	594361	594378	CCGGGTTCGATTCCCGG	2280	-	6.34E-12	tRNA	-	tG(CCC)O
chrXV	658299	658316	CTGGGTTCAATACCAAT	-8118	+	5.61E-06	gene	+	YOR173W
chrXV	663819	663836	CCCAGTTCGATCCTGGG	1840	-	3.57E-07	tRNA	-	tV(AAC)O
chrXV	854194	854211	ATCGGTTCGATTCCGGT	1868	-	2.72E-07	tRNA	-	tA(UGC)O
chrXV	881899	881916	ATATGTTCTAATCTTCC	1180	+	4.39E-06	gene	+	YOR301W
chrXV	976468	976485	GAGAGTTCGAACCTCCC	-8187	+	6.95E-06	tRNA	+	tM(CAU)O2
chrXV	980762	980779	CTGGGTTCAATTCCCAG	2124	+	5.55E-09	tRNA	+	tP(UGG)O3
chrXV	1012293	1012310	ATGAGTACAATTCTCAT	-8207	+	7.54E-06	gene	+	YOR359W
chrXVI	56176	56193	GCAGGTTCAATTCCTGT	1872	-	2.62E-07	tRNA	-	tW(CCA)P
chrXVI	111626	111643	ATGGTTTCAATTCTGGG	-8174	-	6.62E-06	gene	+	YPL231W
chrXVI	117628	117645	CGAAGTTCAATCCTTAT	1545	+	2.20E-06	gene	+	YPL229W
chrXVI	137079	137096	AGCTGTTCTACCCCCAT	1039	-	4.65E-06	gene	+	YPL219W
chrXVI	210199	210216	CGGGGTTCGACTCCCCG	1732	-	8.43E-07	tRNA	-	tE(UUC)P
chrXVI	320406	320423	GGAAGTTCAAAACTCAT	1539	-	2.25E-06	gene	-	YPL122C
chrXVI	325272	325289	TGGGGTTCGAATCCCAT	-8085	+	5.26E-06	gene	-	YPL119C
chrXVI	391106	391123	GGCTGTTCAAACCTTGT	1353	-	3.63E-06	gene	+	YPL085W
chrXVI	435900	435917	CTTAGTTCGATCCTGAG	-8181	-	6.79E-06	tRNA	-	tC(GCA)P1
chrXVI	450048	450065	CCAGGTTCAATTCCCTG	-8033	+	4.95E-06	gene	-	YPL058C
chrXVI	560205	560222	CTGTGTTCGATCCACAG	-8146	-	6.03E-06	tRNA	-	tF(GAA)P1
chrXVI	572314	572331	CCCGGTTCGATTCCGGG	1949	+	1.09E-07	tRNA	+	tG(GCC)P1
chrXVI	582109	582126	AGGGGTTCGAGCCCCCT	-8164	+	6.38E-06	tRNA	+	tK(CUU)P
chrXVI	622547	622564	CTGTGTTCGATCCACAG	-8146	-	6.03E-06	tRNA	-	tF(GAA)P2
chrXVI	689621	689638	GCTGGTTCAAATCCTGC	-8210	+	7.63E-06	tRNA	+	tS(UGA)P
chrXVI	769214	769231	AGGGGTTCGAGCCCCCT	-8164	-	6.38E-06	tRNA	-	tK(UUU)P
chrXVI	775772	775789	CTTAGTTCGATCCTGAG	-8181	-	6.79E-06	tRNA	-	tC(GCA)P2
chrXVI	794981	794998	CGGAGTTCAAACCTCTT	-8232	-	8.46E-06	gene	+	YPR132W
chrXVI	810724	810741	GTGAGTTCAACCCTCAC	1635	+	1.50E-06	tRNA	+	tN(GUU)P
chrXVI	815384	815401	CTAGGTTCAAATCCCCC	1766	+	6.62E-07	gene	+	YPR140W
chrXVI	819577	819594	AGCGGTTCGATCCCGCT	1616	+	1.64E-06	tRNA	+	tI(AAU)P1
chrXVI	860424	860441	CCCGGTTCGATTCCGGG	1949	+	1.09E-07	tRNA	+	tG(GCC)P2
chrXVI	880303	880320	AGCGGTTCGATCCCGCT	1616	-	1.64E-06	tRNA	-	tI(AAU)P2
chrII	419929	419946	GTATGTTCTACCCCCCT	1168	+	4.43E-06	NA	NA	NA
chrII	727275	727292	CCAAGTTCTAATCTCAT	1605	+	1.72E-06	NA	NA	NA
chrII	800303	800320	CCGTGTTCTAATCTTCT	1455	+	2.92E-06	NA	NA	NA
chrIII	5251	5268	ATGAGTTCAATTTTCGC	-8208	+	7.57E-06	NA	NA	NA
chrIV	292421	292438	ACCGGTTCAATCCTAAT	-8259	-	9.69E-06	NA	NA	NA
chrIV	1103505	1103522	ATGGATTCGATACCTGG	-8200	+	7.30E-06	NA	NA	NA
chrIV	1522126	1522143	CTGTGTTCCATTCTCAT	-8195	-	7.16E-06	NA	NA	NA
chrV	39649	39666	ATAAGTTCTACACCCGC	1277	+	4.03E-06	NA	NA	NA
chrVI	173936	173953	ATGGTTTCAATTCTCGT	-8094	-	5.34E-06	NA	NA	NA
chrVII	654154	654171	GGAGGTTCTATCCCCAT	1545	-	2.20E-06	NA	NA	NA
chrVII	703273	703290	ACGGGTTTGATCCTTCT	-8255	+	9.48E-06	NA	NA	NA
chrVII	843739	843756	CTGGGTTTAAATCTCAT	-8199	-	7.27E-06	NA	NA	NA
chrVIII	422514	422531	CTCAGTTCGATACTTGG	1698	-	1.06E-06	NA	NA	NA
chrX	90405	90422	CTCGGTTCGACCCTGAG	1521	+	2.39E-06	NA	NA	NA
chrXI	352959	352976	ACGGGTGCAAAACCGGG	-8244	+	8.97E-06	NA	NA	NA
chrXII	792264	792281	AAGAGTTCAAAACTCGC	-8211	-	7.67E-06	NA	NA	NA
chrXIII	146411	146428	CTAAGTTCAAATCTGCT	1621	-	1.61E-06	NA	NA	NA
chrXIII	798016	798033	ACGGGTTCGTTTCTTCT	-8237	+	8.66E-06	NA	NA	NA
chrXV	733863	733880	CTAGGTCCGATCCCCAG	-8206	+	7.49E-06	NA	NA	NA
chrXV	757679	757696	TTGAGTTCGATACTCAG	-8055	+	5.05E-06	NA	NA	NA
chrXV	989491	989508	CGCGGTTCAAATCTTGT	1575	-	1.96E-06	NA	NA	NA
chrXVI	645637	645654	CCGAGATCGATTCCGCG	-8191	+	7.06E-06	NA	NA	NA
chrXVI	829162	829179	AGGGGTCCGAATCTCGG	-8187	+	6.95E-06	NA	NA	NA
